# Supplementary material for: A bacterial regulatory uORF senses multiple classes of ribosome-targeting antibiotics
Source: eLife. 2025 May 29;13:RP101217. doi: 10.7554/eLife.101217 (PMC12121999; doi:10.7554/eLife.101217)
Supplement: Supplementary file 1. [file elife-101217-supp1.xlsx]

## Sheet: 1A
Table S1. List of 23S rRNA mutants isolated in the genetic selection for factors that repress topAI.
Gene	Nucleotide change
rrlC	ΔT1917
rrlA	ΔG1911
rrlA	G2253T

## Sheet: 1B
Table S2. Luciferase reporter assay data for pGB202 in strain GB1, with different antibiotic treatments.
Antibiotic	Concentration (μg/ml)	RLUs/OD600
None	0	1.74064
None	0	4.11946
None	0	4.64396
Tetracycline	0.1	41.876
Tetracycline	0.1	17.0758
Tetracycline	0.1	15.2471
Tetracycline	0.2	439.341
Tetracycline	0.2	326.531
Tetracycline	0.2	153.556
Tetracycline	0.5	2212.28
Tetracycline	0.5	1816.47
Tetracycline	0.5	1906.32
Tetracycline	1	1093.5
Tetracycline	1	822.368
Tetracycline	1	1325.88
Tetracycline	2	562.623
Tetracycline	2	502.924
Tetracycline	2	454.172
Spectinomycin	10	2.23414
Spectinomycin	10	7.75595
Spectinomycin	10	4.64876
Spectinomycin	20	8.40708
Spectinomycin	20	3.18471
Spectinomycin	20	8.75386
Spectinomycin	45	31.5068
Spectinomycin	45	30.0218
Spectinomycin	45	21.0748
Spectinomycin	90	126.066
Spectinomycin	90	148.455
Spectinomycin	90	65.3105
Spectinomycin	120	198.558
Spectinomycin	120	212.994
Spectinomycin	120	160.656
Retapamulin	0.5	8.07196
Retapamulin	0.5	7.58342
Retapamulin	0.5	11.4971
Retapamulin	2	198.2
Retapamulin	2	127.153
Retapamulin	2	123.434
Retapamulin	4	412.042
Retapamulin	4	182.945
Retapamulin	4	307.79
Retapamulin	8	597.194
Retapamulin	8	334.341
Retapamulin	8	295.722
Retapamulin	16	641.304
Retapamulin	16	152.778
Retapamulin	16	268.229
Erythromycin	1	5.12582
Erythromycin	1	3.5824
Erythromycin	1	4.94071
Erythromycin	10	99.8062
Erythromycin	10	7.56757
Erythromycin	10	4.70219
Erythromycin	50	36.4146
Erythromycin	50	9.81461
Erythromycin	50	21.0706
Erythromycin	100	37.6648
Erythromycin	100	6.63717
Erythromycin	100	25.1116
Erythromycin	150	42.5121
Erythromycin	150	8.51305
Erythromycin	150	18.9437
Tylosin	50	1.69779
Tylosin	50	5.91398
Tylosin	50	7.17213
Tylosin	200	4.26621
Tylosin	200	127.374
Tylosin	200	186.084
Tylosin	400	94.2584
Tylosin	400	171.495
Tylosin	400	129.545
Tylosin	600	126.673
Tylosin	600	91.8367
Tylosin	600	89.7868
Tylosin	800	37.3206
Tylosin	800	65.4384
Tylosin	800	70.5202
Chloramphenicol	0.1	2.35849
Chloramphenicol	0.1	2.68528
Chloramphenicol	0.1	3.97614
Chloramphenicol	0.2	2.94118
Chloramphenicol	0.2	2.76549
Chloramphenicol	0.2	4.59184
Chloramphenicol	1	2.58532
Chloramphenicol	1	5.14874
Chloramphenicol	1	4.97238
Chloramphenicol	5	2.21239
Chloramphenicol	5	7.76583
Chloramphenicol	5	4.04157
Chloramphenicol	15	3.37079
Chloramphenicol	15	3.0525
Chloramphenicol	15	2.91715
Kasugamycin	1	4.07166
Kasugamycin	1	5.02793
Kasugamycin	1	3.14465
Kasugamycin	10	5.65428
Kasugamycin	10	3.51053
Kasugamycin	10	3.68421
Kasugamycin	25	3.09837
Kasugamycin	25	4.67775
Kasugamycin	25	2.10084
Kasugamycin	50	3.4965
Kasugamycin	50	3.50701
Kasugamycin	50	5.06586
Kasugamycin	100	2.73651
Kasugamycin	100	3.14465
Kasugamycin	100	4.14508
Gentamycin	0.1	3.44037
Gentamycin	0.1	2.53293
Gentamycin	0.1	4.42913
Gentamycin	0.5	2.7027
Gentamycin	0.5	4.04858
Gentamycin	0.5	7.01403
Gentamycin	1	1.60901
Gentamycin	1	4.06918
Gentamycin	1	3.60453
Gentamycin	2	3.5497
Gentamycin	2	6.06395
Gentamycin	2	3.22581
Gentamycin	5	5.52209
Gentamycin	5	5.16648
Gentamycin	5	4.03226
Amikacin	1	3.27715
Amikacin	1	4.1841
Amikacin	1	3.98633
Amikacin	10	5.62324
Amikacin	10	4.08998
Amikacin	10	4.84914
Amikacin	25	2.7959
Amikacin	25	3.61197
Amikacin	25	4.11523
Amikacin	50	5.20833
Amikacin	50	4.10256
Amikacin	50	3.83772
Amikacin	100	4.41176
Amikacin	100	4.92881
Amikacin	100	2.09205
Streptomycin	1	2.78552
Streptomycin	1	3.53893
Streptomycin	1	4.64876
Streptomycin	10	3.74883
Streptomycin	10	3.0581
Streptomycin	10	2.04708
Streptomycin	25	4.21743
Streptomycin	25	3.6157
Streptomycin	25	4.21053
Streptomycin	50	5.47809
Streptomycin	50	3.02725
Streptomycin	50	3.64583
Streptomycin	100	4.71254
Streptomycin	100	5.52486
Streptomycin	100	5.31915
Apramycin	1	4.83092
Apramycin	1	4.66321
Apramycin	1	2.48262
Apramycin	10	3.91389
Apramycin	10	3.56415
Apramycin	10	3.38164
Apramycin	25	2.45098
Apramycin	25	3.16122
Apramycin	25	2.5025
Apramycin	50	3.69198
Apramycin	50	6.17978
Apramycin	50	4.10678
Apramycin	100	3.84615
Apramycin	100	3.55872
Apramycin	100	3.72737
Hygromycin	1	1.61031
Hygromycin	1	5.37634
Hygromycin	1	2.44618
Hygromycin	10	2.40192
Hygromycin	10	4.1365
Hygromycin	10	3.46878
Hygromycin	25	3.27065
Hygromycin	25	3.13152
Hygromycin	25	2.99401
Hygromycin	50	4.41306
Hygromycin	50	4.24628
Hygromycin	50	3.91007
Hygromycin	100	5.00455
Hygromycin	100	7.8329
Hygromycin	100	6.24291

## Sheet: 1C
Table S3. SHAPE-Seq reactivity scores (ρ).
		Untreated			Tetracycline
Position	Nucleotide	Replicate 1	Replicate 2	Replicate 3	Replicate 1	Replicate 2
1	G	4.80525	7.11563	4.67494	6.84492	6.91319
2	T	7.4193	5.5667	2.89652	7.65787	4.88903
3	A	4.54257	5.96696	6.41285	6.46938	5.8423
4	A	3.80146	6.02279	5.16568	4.95361	4.52316
5	A	2.99448	4.91234	4.63461	3.60433	3.25084
6	T	3.01063	4.4019	4.27392	3.35865	2.90748
7	A	0.677706	1.01623	2.1993	0.990789	1.07856
8	C	0.206821	0.118456	1.19208	0.28552	0.426042
9	C	0	1.0934	9.09401	1.41796	1.99388
10	T	2.41903	2.28109	3.67469	2.20549	1.87603
11	T	4.03687	4.23797	4.93171	3.79832	2.9803
12	T	0.463528	0.470632	0.360198	0.772888	0.363383
13	C	1.28385	0.651742	1.18661	1.20059	0.713326
14	A	2.07958	2.81255	2.61179	2.12068	1.45043
15	A	0.143271	0.101614	0.877943	0.507553	0.649009
16	C	1.10751	1.5876	1.76721	1.62113	1.366
17	T	0.324835	0.333394	0.353032	0.764204	0.250651
18	C	1.37314	0.75363	0.983614	1.40724	0.612215
19	A	1.68543	1.64987	1.99706	3.21948	2.12292
20	A	0.423099	0.657094	0.971021	1.03631	0.968756
21	C	0.223972	0.424213	0.599876	1.13598	0.875898
22	C	0.317769	0.498402	0.681433	1.04013	0.795154
23	C	0.152825	0.245913	0.177453	0.577035	0.373158
24	G	0.944404	0.973806	0.921929	0.410883	0.206242
25	A	0.014341	0.169464	0.230579	0.068094	0.036552
26	G	0.15312	0.347925	0.119289	0.113747	0.06441
27	G	3.4826	4.67987	6.38367	1.38979	1.9729
28	C	3.30762	4.07806	4.62666	2.15309	2.0198
29	T	3.70464	3.66567	3.32461	2.70342	2.30345
30	T	5.12435	6.54739	6.76643	3.2652	2.72578
31	T	0.360377	0.743368	0.498975	0.271902	0.275341
32	G	2.95937	3.43905	2.62339	1.15075	1.12024
33	A	1.02969	0.883888	1.47397	0.352891	0.504676
34	T	0.060384	0.477102	0.495165	0.147248	0.105409
35	G	0.809085	0.761532	0.830426	0.212457	0.445497
36	C	0.627223	0.918327	0.684122	1.03212	0.794114
37	T	0.106475	0.327873	0.363038	0.293233	0.245685
38	G	0.215613	0.269912	0.287989	0.281922	0.19276
39	G	1.32029	1.6057	0.987686	1.1875	0.973679
40	A	0.218521	0.30671	0.157491	0.26615	0.1751
41	G	0.78651	0.926476	0.524667	2.40349	1.24331
42	A	3.7643	3.43327	5.106	4.0037	3.02931
43	A	1.73385	1.88224	3.05485	2.43701	2.56339
44	T	0.822128	1.10402	1.32422	0.957495	0.986305
45	G	5.62016	4.82472	4.31321	6.24134	4.71874
46	T	2.38137	2.4527	2.53132	2.86148	2.25058
47	A	2.90352	2.62462	3.04154	4.60159	4.04221
48	A	3.8041	3.89317	4.29695	5.00765	5.18165
49	T	0.415014	0.584854	0.754981	0.565735	0.689202
50	C	1.70465	1.0125	0.744565	1.03695	0.755795
51	A	1.48344	1.18398	1.61293	2.05813	2.39938
52	T	0.622813	0.94772	1.05617	0.789565	0.877852
53	C	0.266267	0.596579	0.692085	0.520614	0.551535
54	C	0.516667	1.91756	1.05388	0.671576	0.851874
55	G	0.033453	0.195858	0	0.399119	0.29868
56	A	0.737253	0	0.4794	0.379257	0.680598
57	T	0.152717	0.676498	0.748028	0.358033	0.421234
58	A	0.501855	0.558405	0.316258	0.424565	0.506758
59	A	0.859415	0.75755	0.937502	0.604225	1.01767
60	T	0.114578	0.236964	0.477021	0.102195	0.18698
61	C	0.067737	0.011292	0.191391	0.059326	0.099578
62	A	0.075487	0	0.114868	0.051554	0.061951
63	G	0.64893	0.462479	0.839836	0.338022	0.437121
64	T	1.73808	2.7861	3.30908	1.1543	1.86244
65	T	0.460434	0.387395	0.483948	0.270369	0.420272
66	C	0.368222	0.720957	0.775164	0.339608	0.535487
67	C	0.15842	0.500488	0.442271	0.2022	0.287455
68	C	0.065307	0.14246	0.136191	0.077415	0.079561
69	C	0	0.079015	0.03953	0.029646	0.009058
70	G	0.224631	0	0	0.139474	0.107037
71	A	0.077447	0	0.253524	0.072356	0.090328
72	C	0	0	0.025061	0.015766	0.009373
73	C	0.04568	0.090139	0.052144	0.067702	0.062317
74	T	0.423525	0.6387	1.1152	0.378106	0.353589
75	T	2.75368	4.27581	4.27459	2.70025	3.4789
76	T	2.10829	2.78284	1.73609	2.31886	1.91906
77	T	0.939203	1.40598	1.86448	0.795315	1.2716
78	C	0.335285	0.581927	0.723414	0.53285	0.695628
79	A	0	0	0	0.006696	0.004034
80	G	0.031459	0	0	0	0.035777
81	G	0.245303	0	0	0.096648	0.185599
82	C	0	0	0	0.004146	0.01509
83	C	0	0	0	0.010337	0.02176
84	G	0	0	0	0	0.002252
85	G	0.458908	0	0	0.322647	0.126106
86	A	0.366436	0.158418	0.062797	0.256562	0.379095
87	C	0	0.270809	0.20944	0.104656	0.178111
88	T	0	0	0.212827	0.041932	0.038326
89	G	0.021961	0	0	0.190729	0.046488
90	A	0.555382	0	0	0.244138	0.267872
91	T	0.118847	0.08888	0.246527	0.245815	0.239193
92	T	0.178141	0.019482	0.513422	0.274364	0.057093
93	A	0.426721	0	0	0.308669	0.583991
94	T	0.050078	0.102167	0.183173	0.118656	0.039394
95	C	0.249204	0.349909	0.341906	0.392531	0.396216
96	A	2.48812	2.41487	1.55589	3.27143	4.34735
97	A	0.655236	0.649223	0.785758	0.747649	1.45742
98	T	0.317387	0.464661	0.427847	0.40892	0.677214
99	G	0.199497	0	0	0.167027	0.165802
100	C	0.053197	0.093018	0.194663	0.133438	0.129585
101	G	1.01182	0.515605	0.691226	0.77222	1.11911
102	C	0.360281	0.400166	0.693629	0.369122	0.571586
103	C	0	0	0	0.328811	0.389701
104	G	1.34257	0.119877	0	1.94169	1.48057
105	A	1.07727	1.69363	0	0	0.527528
106	A	2.01977	1.21323	2.25403	1.727	1.96232
107	A	3.0301	2.52629	7.40118	2.8556	3.89743
108	T	0.690506	1.37663	1.57969	0.821839	1.33503
109	C	0.23803	0.382054	0.184826	0.38982	0.468568
110	G	1.80816	1.96565	0.374553	1.91	2.2182
111	A	3.69526	4.87706	2.61637	3.4536	4.24672
112	A	1.44233	1.22976	0.723375	1.41838	2.00175
113	T	0.382618	0.579586	0.486437	0.374024	0.470601
114	G	0.128342	0	0	0.064082	0.109755
115	C	0	0	0	0.006173	0.011014
116	G	0	0	0	0.03528	0
117	G	0.656061	0	0	0.42356	0.149869
118	A	0.103127	0.143006	0.156375	0.0656	0.086206
119	C	0.165676	0.232548	0.268715	0.232534	0.213576
120	A	0.202037	0	0	0.144704	0.272577
121	C	0	0.073909	0.032241	0.029028	0.026666
122	C	0.142285	0.148006	0.180674	0.167625	0.224756
123	G	0.835896	0.902626	0.049704	0.951303	1.0921
124	C	0.174913	0.485412	0.238613	0.243528	0.321834
125	G	1.68957	2.92751	0	1.55635	2.13034
126	G	1.19564	0.346193	0	1.11822	1.39105
127	T	1.03601	1.12941	0.788183	0.932563	0.78523
128	G	0.303266	0	0	0.102599	0.031787
129	T	0.05406	0	0	0.059159	0
130	G	0.717029	0	0	0.325923	0.102664
131	T	0.254492	0.221243	0.274615	0.24308	0.033592
132	T	0.196447	0.078432	0.175298	0.133082	0.08517
133	T	0.079786	0	0.010344	0.078675	0.09124
134	G	0.121262	0	0	0.074094	0.054034
135	C	0.298129	0.218181	1.54637	0.200041	0
136	A	0.118556	0	0	0.16096	0.177556
137	C	0.058786	0	0	0.146366	0.076021
138	G	0.598079	0	0	0.448065	0.172694
139	T	0.191098	0	0	0.324834	0.099037
140	T	0.200703	0.128579	0	0.391151	0.169749
141	T	0.149001	0.201913	0.206921	0.272157	0.269914
142	T	0.129508	0.111461	0.076064	0.147054	0.135379
143	G	0.147619	0	0	0.179458	0.068816
144	C	2.32445	0.029011	0.147728	0.366369	0.366488
145	A	0.146422	0	0	0.232122	0.209473
146	C	2.02693	0	0	0.505416	0.413695
147	A	0.392313	0	0	0.770879	0.64882
148	T	0.111545	0.16434	0.021656	0.216439	0.267155
149	G	0.247212	0	0	1.10687	0.374354
150	A	0.990321	0	0	0.618949	0.46243
151	T	0.220386	0.108287	0.810245	0.166671	0.214624
152	G	2.1874	0	0	0.469571	0
153	A	1.14808	0	0	1.30136	0.988042
154	T	0	0.321461	0.149609	1.56316	1.632
155	T	1.15731	0.539779	1.55198	2.02936	2.11229
156	A	1.24802	1.21488	0	2.27121	2.7638
157	A	2.70555	2.60436	0.829312	2.87846	3.09593
158	A	2.42488	0.538384	0	2.3521	2.15613
159	T	2.05337	1.03825	0.515767	1.03707	1.04507
160	A	0.245622	0.685571	0	0.195245	0.398012
161	G	0.920814	0.674581	0	0.543741	0.522077
162	G	0.620365	0	0	0.617714	0.082252
163	T	0.323835	0.353064	0.467723	0.841843	1.02918
164	T	0.073417	0.111852	0.054319	0.296487	0.328164
165	C	0	0	0	0.170357	0
166	T	0	0	0	1.46905	0.765197
167	T	0.126654	0.169635	0.207352	0.503407	0.781786
168	C	0.511712	0.081486	0	0.213943	0.268695
169	A	0.159698	0.135198	0	0.417318	0.502858
170	G	0.439696	0	0	0.836825	0.871552
171	T	1.52536	0.100487	4.52611	0	1.2066
172	A	0.672177	0	0	0.879043	1.12455
173	T	0.153082	0.232277	0.03948	0.090949	0.253983
174	G	2.45857	2.81691	0	0.603526	1.42224
175	A	4.79678	6.57939	1.08056	0.401196	3.587
176	A	1.6359	0.703564	0	1.02937	1.33897
177	T	0.743193	0.897646	0.604233	0.832941	0.991423
178	T	0.810433	1.18077	0.883713	0.706573	1.24033
179	T	3.97464	3.46358	2.09844	1.36814	2.41468
180	A	0.969332	0.334097	0.036268	0.637883	0.857209
181	T	0.161625	0.139126	0.113225	0.117098	0.156956
182	C	0.185493	0.15159	0.183264	0.117718	0.223315
183	C	0	0.111175	0.053817	0.030559	0.080743
184	C	0	0.031738	0.002144	0.002933	0.018553
185	G	0.082189	0	0	0.046731	0.020923
186	T	0	0	0	0	0
187	C	0.015581	0	0.000552	1.38e-05	0.001556
188	A	0	0.003963	0	0	0.003618
189	G	0.001498	0.002845	0	7.89e-06	0.001298
190	G	0	0.001705	0	0.00145	0.00466
191	A	0.001509	0.005237	0.001612	0.000636	0.001291
192	A	0.000604	0.000373	0.00052	0.000169	0
193	C	0.001208	0.000373	0	0.000129	0
194	A	0	0.000373	0	0.001185	0.000375
195	A	0	0	0	0	0
196	C	0	0	0	0	0
197	A	0	0	0	0	0
198	T	0	0	0	0	0
199	A	0	0	0	0	0
200	C	0	0	0	0	0
201	C	0	0	0	0	0
202	T	0	0	0	0	0
203	T	0	0	0	0	0
204	A	0	0	0	0	0
205	C	0	0	0	0	0
206	A	0.863651	0.863651	0.863651	0.863651	0.863651

## Sheet: 1D
Table S4. Normalized Ribo-seq coverage for genes comparing growth with tetracycline treatment vs no antibiotic.
Region Starta	Region Enda	Strand	Name	Synonym	Product	No antibiotic expressionb	Tetracycline expressionb	qValue		Footnotes
4534023	4533826	-	yjhX	b4566	UPF0386 family protein	2	628	2.48723e-07		a The first and last 30 nt of each gene was excluded
4467655	4470291	+	mgtA	b4242	magnesium transporter	1	179	2.7921e-25		b Expression values are normalized by region length and by the upper quartile of gene expression
29681	30769	+	carA	b0032	carbamoyl phosphate synthetase small subunit, glutamine amidotransferase	1	144	0.00248936
3086021	3085950	-	yqgB	b2939	uncharacterized protein	2	280	1
4533153	4532467	-	yjhP	b4306	putative methyltransferase	15	2013	2.27161e-52
1049714	1049469	-	gfcA	b0987	O-antigen capsule production threonine-rich inner membrane protein	1	123	0.0755119
4533754	4533269	-	yjhQ	b4307	putative acetyltransferase	22	2370	2.68295e-34
4278509	4279798	+	yjcD	b4064	inner membrane putative guanine permease	1	81	1
3896579	3895302	-	purP	b3714	adenine permease, high affinity; adenine:H+ symporter	2	124	0.0729036
3438619	3438461	-	arfA	b4550	alternate ribosome-rescue factor A	47	2661	0.00156187
332401	333429	+	yahA	b0315	c-di-GMP-specific phosphodiesterase	1	55	1
1051145	1050993	-	cspH	b0989	stress protein, member of the CspA-family	4	184	1
1977814	1977296	-	flhC	b1891	flagellar class II regulon transcriptional activator, with FlhD	1	45	1
3853227	3853148	-	istR	b4616	-	16	699	1
1641885	1642037	+	cspF	b1558	Qin prophage; cold shock protein	2	86	1
852567	851044	-	ybiP	b0815	putative EptAB family phosphoethanolamine transferase, inner membrane protein	1	40	1
1619150	1619524	+	marR	b1530	transcriptional repressor of multiple antibiotic resistance	1	38	1
2663472	2664215	+	suhB	b2533	inositol monophosphatase	12	453	0.108709
3609247	3609852	+	yhhQ	b3471	DUF165 family inner membrane protein	1	37	1
1978167	1977877	-	flhD	b1892	flagellar class II regulon transcriptional activator, with FlhC	2	73	1
3194835	3194753	-	sibD	b4447	-	4	141	1
578863	578630	-	borD	b0557	DLP12 prophage; putative lipoprotein	23	807	0.261836
3332705	3331800	-	yhbE	b3184	EamA family inner membrane putative transporter	3	105	1
1260773	1259154	-	dauA	b1206	C4-dicarboxylic acid transporter	4	139	1
3853952	3855076	+	emrD	b3673	multidrug efflux system protein	8	265	0.382056
2087032	2085734	-	plaP	b2014	putrescine importer, low affinity	2	66	1
3850696	3850166	-	uhpA	b3669	response regulator in two-component regulatory system wtih UhpB	3	95	1
2620130	2618901	-	uraA	b2497	uracil permease	1	31	1
1266954	1267286	+	ychQ	b1213	SIRB family inner membrane protein	1	30	1
2745888	2745400	-	rimM	b2608	16S rRNA processing protein	66	1863	0.0613739
2621227	2622204	+	purM	b2499	phosphoribosylaminoimidazole synthetase	8	224	1
1517419	1517532	+	ydcX	b1445	DUF2566 family protein	1	27	1
2758674	2758826	+	alpA	b2624	CP4-57 prophage; DNA-binding transcriptional activator	1	27	1
3410310	3411215	+	dusB	b3260	tRNA-dihydrouridine synthase B	4	107	1
122122	122826	+	pdhR	b0113	pyruvate dehydrogenase complex repressor; autorepressor	20	522	1
3986462	3986608	+	glmZ	b4456	-	4	101	1
10464	9958	-	satP	b0010	succinate-acetate transporter	1	25	1
947259	948629	+	ycaM	b0899	putative transporter	1	25	1
4551266	4549983	-	gntP	b4321	fructuronate transporter	1	25	1
2745309	2744602	-	trmD	b2607	tRNA m(1)G37 methyltransferase, SAM-dependent	51	1266	0.210874
1995848	1996012	+	yecF	b1915	DUF2594 family protein	19	458	1
2872460	2871810	-	ispD	b2747	4-diphosphocytidyl-2C-methyl-D-erythritol synthase	4	95	1
1146824	1147285	+	yceD	b1088	DUF177 family protein	141	3341	1
2929606	2930913	+	sdaB	b2797	L-serine dehydratase 2	15	355	1
16930	16781	-	mokC	b0018	regulatory protein for HokC, overlaps CDS of hokC	1	22	1
77651	78769	+	setA	b0070	broad specificity sugar efflux system	1	22	1
583711	584400	+	appY	b0564	global transcriptional activator; DLP12 prophage	2	44	1
1905718	1906224	+	mntP	b1821	putative Mn(2+) efflux pump, mntR-regulated	2	44	1
16873	16781	-	hokC	b4412	toxic membrane protein, small	1	22	1
1051877	1052047	+	ymcE	b0991	cold shock gene	1	21	1
3089785	3090222	+	yggI	b2944	Zn-dependent metalloprotease-related protein	1	21	1
4472503	4472429	-	pyrL	b4246	pyrBI operon leader peptide	1	21	1
1547139	1546318	-	yddG	b1473	aromatic amino acid exporter	1	20	1
3298108	3297128	-	yraQ	b3151	putative inner membrane permease	2	40	1
3274877	3273603	-	garP	b3127	putative (D)-galactarate transporter	11	219	1
1705797	1706318	+	rsxA	b1627	SoxR iron-sulfur cluster reduction factor component; inner membrane protein of electron transport complex	4	79	1
3161116	3158957	-	ygiQ	b4469	Radical SAM superfamily protein	4	77	1
345434	345619	+	yahM	b0327	uncharacterized protein	1	19	1
2440090	2438972	-	yfcJ	b2322	putative arabinose efflux transporter	1	19	1
2928259	2929488	+	sdaC	b2796	putative serine transporter	43	809	1
3818904	3819461	+	yicG	b3646	UPF0126 family inner membrane protein	10	186	1
3453240	3452989	-	rpsJ	b3321	30S ribosomal subunit protein S10	1055	19475	0.00036753
1710858	1711493	+	rsxE	b1632	SoxR iron-sulfur cluster reduction factor component; electron transport inner membrane NADH-quinone reductase	4	73	1
160082	159216	-	gluQ	b0144	glutamyl-Q tRNA(Asp) synthetase	3	54	1
1699385	1700917	+	malX	b1621	fused maltose and glucose-specific PTS enzymes: IIB component, IIC component	1	18	1
1894835	1896136	+	pabB	b1812	aminodeoxychorismate synthase, subunit I	1	18	1
4150235	4148562	-	eptC	b3955	LPS heptose I phosphoethanolamine transferase	2	36	1
2025283	2025257	-	dsrA	b1954	-	13	231	1
2071345	2071488	+	isrC	b4435	-	2	35	1
1679587	1680909	+	ydgI	b1605	putative arginine/ornithine antiporter transporter	1	17	1
4543758	4544237	+	fimI	b4315	fimbrial protein involved in type 1 pilus biosynthesis	4	68	1
3307903	3307883	-	yrbN	b4685	uncharacterized protein	8	135	1
1706378	1706896	+	rsxB	b1628	SoxR iron-sulfur cluster reduction factor component; putative iron-sulfur protein	3	50	1
1706949	1709111	+	rsxC	b1629	SoxR iron-sulfur cluster reduction factor component; putative membrane-associated NADH oxidoreductase of electron transport complex	4	66	1
3452896	3452327	-	rplC	b3320	50S ribosomal subunit protein L3	1127	18554	0.322459
3522901	3525393	+	mrcA	b3396	fused penicillin-binding protein 1a: murein transglycosylase/murein transpeptidase	3	49	1
1878803	1878841	+	yoaK	b4676	inner membrane-associated protein	43	702	1
775183	775815	+	tolQ	b0737	membrane spanning protein in TolA-TolQ-TolR complex	13	212	1
2008307	2009452	+	yedE	b1929	UPF0394 family sulfur transport domain-containing inner membrane protein	16	259	1
724949	724437	-	kdpC	b0696	potassium translocating ATPase, subunit C	1	16	1
552564	551557	-	purK	b0522	N5-carboxyaminoimidazole ribonucleotide synthase	5	79	1
3331724	3330612	-	obgE	b3183	GTPase involved in cell partioning and DNA repair	46	707	1
4425550	4425804	+	priB	b4201	primosomal protein N	90	1382	1
2704033	2703413	-	rnc	b2567	RNase III	30	453	1
293888	293250	-	yagL	b0278	CP4-6 prophage; DNA-binding protein	1	15	1
321638	322297	+	ykgE	b0306	cysteine-rich LutA family protein; putative electron transport chain YkgEFG component	38	570	1
3204559	3204251	-	folB	b3058	bifunctional dihydroneopterin aldolase/dihydroneopterin triphosphate 2'-epimerase	12	180	1
4361904	4360426	-	cadC	b4133	cadBA operon transcriptional activator	1	15	1
3444067	3442796	-	secY	b3300	preprotein translocase membrane subunit	269	4029	0.0755119
2468244	2469104	+	gtrB	b2351	CPS-53 (KpLE1) prophage; bactoprenol glucosyl transferase	48	716	1
3411301	3411537	+	fis	b3261	global DNA-binding transcriptional dual regulator	39	581	1
4180026	4180463	+	rplJ	b3985	50S ribosomal subunit protein L10	2155	31833	0.151338
3925603	3923774	-	mnmG	b3741	5-methylaminomethyl-2-thiouridine modification at tRNA U34	17	247	1
2237723	2236773	-	mglC	b2148	methyl-galactoside transporter subunit	2	29	1
3448538	3448344	-	rpsQ	b3311	30S ribosomal subunit protein S17	1831	26283	0.151338
3307830	3306001	-	deaD	b3162	ATP-dependent RNA helicase	180	2580	0.10118
883703	884875	+	mdfA	b0842	multidrug efflux system protein	3	43	1
189742	189817	+	tff	b4414	-	176	2502	1
3448729	3448598	-	rpmC	b3312	50S ribosomal subunit protein L29	1733	24631	0.0560769
1710234	1710794	+	rsxG	b1631	SoxR iron-sulfur cluster reduction factor component; putative membrane protein of electron transport complex	5	71	1
1704979	1705134	+	cnu	b1625	nucleoid-associated oriC-binding protein; H-NS and StpA stabilizing factor	10	140	1
2230654	2230992	+	yohJ	b2141	UPF0299 family inner membrane protein	10	139	1
1930911	1932029	+	purT	b1849	phosphoribosylglycinamide formyltransferase 2	4	55	1
3446854	3446609	-	rpsN	b3307	30S ribosomal subunit protein S14	2170	29733	0.877444
601989	603305	+	pheP	b0576	phenylalanine transporter	3	41	1
2311504	2310509	-	apbE	b2214	putative thiamine-synthetic flavin transferase lipoprotein	2	27	1
3452256	3451711	-	rplD	b3319	50S ribosomal subunit protein L4	1210	16319	1
4049929	4049977	+	spf	b3864	-	18	241	1
1743487	1744800	+	mdtK	b1663	multidrug efflux system transporter	17	227	1
1127869	1129344	+	murJ	b1069	putative peptidoglycan lipid II flippase	4	53	1
4053727	4053677	-	yshB	b4686	uncharacterized protein	299	3911	1
1147651	1148661	+	plsX	b1090	putative phosphate acyltransferase	22	287	1
1197502	1196897	-	ymfD	b1137	e14 prophage; putative SAM-dependent methyltransferase	4	52	1
3447737	3447483	-	rplX	b3309	50S ribosomal subunit protein L24	1631	20723	1
1645244	1645149	-	hokD	b1562	Qin prophage; small toxic polypeptide	3	38	1
4545126	4547702	+	fimD	b4317	fimbrial usher outer membrane porin protein; FimCD chaperone-usher	3	38	1
256007	256405	+	gpt	b0238	xanthine phosphoribosyltransferase; xanthine-guanine phosphoribosyltransferase	32	400	1
2924083	2923814	-	yqcC	b2792	DUF446 family protein	10	124	1
3211137	3212822	+	dnaG	b3066	DNA primase	5	62	1
3407405	3407587	+	yhdT	b3257	DUF997 family putative inner membrane protein	3	37	1
159096	157759	-	pcnB	b0143	poly(A) polymerase	14	171	1
3449853	3449212	-	rpsC	b3314	30S ribosomal subunit protein S3	1498	18295	0.714113
1613221	1612355	-	glsB	b1524	glutaminase 2	5	61	1
1880729	1880151	-	leuE	b1798	leucine efflux protein	7	85	1
3448119	3447808	-	rplN	b3310	50S ribosomal subunit protein L14	1826	22166	1
3608966	3608781	-	tusA	b3470	mnm(5)-s(2)U34-tRNA 2-thiolation sulfurtransferase	20	242	1
883358	882822	-	ybjG	b0841	undecaprenyl pyrophosphate phosphatase	11	133	1
1335321	1335428	+	yciX	b4523	uncharacterized protein	21	253	1
3442441	3442145	-	rpsM	b3298	30S ribosomal subunit protein S13	2279	27351	1
447675	446845	-	cyoE	b0428	protoheme IX farnesyltransferase	43	516	1
1100326	1100757	+	ycdZ	b1036	DUF1097 family inner membrane protein	4	48	1
3439479	3439171	-	yhdN	b3293	DUF1992 family protein	5	60	1
2653885	2654128	+	ryfA	b4440	-	2	24	1
2799194	2799583	+	alaE	b2670	alanine exporter, alanine-inducible, stress-responsive	26	311	1
3442068	3441739	-	rpsK	b3297	30S ribosomal subunit protein S11	1536	18360	1
3451654	3451412	-	rplW	b3318	50S ribosomal subunit protein L23	914	10884	0.325523
3449139	3448789	-	rplP	b3313	50S ribosomal subunit protein L16	1440	17098	1
2469161	2470432	+	gtrS	b2352	serotype-specific glucosyl transferase, CPS-53 (KpLE1) prophage	14	165	1
2467885	2468187	+	gtrA	b2350	CPS-53 (KpLE1) prophage; bactoprenol-linked glucose translocase (flippase)	9	106	1
322368	323735	+	ykgF	b0307	ferridoxin-like LutB family protein; putative electron transport chain YkgEFG component	32	376	1
2268884	2269537	+	lpxT	b2174	lipid A 1-diphosphate synthase; undecaprenyl pyrophosphate:lipid A 1-phosphate phosphotransferase	4	47	1
4608215	4608601	+	rimI	b4373	ribosomal-protein-S18-alanine N-acetyltransferase	8	94	1
986952	985924	-	ompF	b0929	outer membrane porin 1a (Ia;b;F)	66	772	1
2985877	2987046	+	yqeG	b2845	putative transporter	9	105	1
3446515	3446183	-	rpsH	b3306	30S ribosomal subunit protein S8	1640	19055	1
4609444	4610973	+	prfC	b4375	peptide chain release factor RF-3	39	450	1
878005	876740	-	rimO	b0835	ribosomal protein S12 methylthiotransferase; radical SAM superfamily	6	69	1
3451334	3450573	-	rplB	b3317	50S ribosomal subunit protein L2	1308	14994	0.903052
553070	552621	-	purE	b0523	N5-carboxyaminoimidazole ribonucleotide mutase	9	103	1
653892	654512	+	citB	b0620	response regulator in two-component regulatory system with CitA	3	34	1
1312216	1311878	-	yciA	b1253	acyl-CoA esterase	9	102	1
4528007	4528036	+	ryjB	b4624	-	3	34	1
426167	427234	+	tgt	b0406	tRNA-guanine transglycosylase	41	458	1
3450496	3450278	-	rpsS	b3316	30S ribosomal subunit protein S19	1054	11667	0.646079
2230355	2229468	-	dusC	b2140	tRNA-dihydrouridine synthase C	1	11	1
2239259	2237799	-	mglA	b2149	fused methyl-galactoside transporter subunits of ABC superfamily: ATP-binding components	3	33	1
4404416	4404553	+	yjeT	b4176	DUF2065 family protein	3	33	1
1509316	1509432	+	hicA	b4532	mRNA interferase toxin of the HicAB toxin-antitoxin system	4	44	1
1007874	1009922	+	rlmL	b0948	fused 23S rRNA m(2)G2445 and m(7)G2069 methyltransferase, SAM-dependent	19	207	1
3805086	3804211	-	waaS	b3629	lipopolysaccharide core biosynthesis protein	8	87	1
2153339	2153421	+	sibA	b4436	-	30	326	1
2698789	2699577	+	yfhH	b2561	putative DNA-binding transcriptional regulator	9	97	1
1335154	1335258	+	ymiA	b4522	uncharacterized protein	21	226	1
4163240	4162200	-	trmA	b3965	tRNA m(5)U54 methyltransferase, SAM-dependent; tmRNA m(5)U341 methyltransferase	14	150	1
830902	832206	+	rhlE	b0797	ATP-dependent RNA helicase	8	85	1
3922410	3922090	-	atpI	b3739	ATP synthase, membrane-bound accessory factor	12	127	1
1009994	1011841	+	uup	b0949	putative transporter subunit of ABC superfamily: ATP-binding component	29	305	1
587951	587121	-	ybcH	b0567	PRK09936 family protein	2	21	1
2142918	2142337	-	udk	b2066	uridine/cytidine kinase	23	236	1
1887961	1886894	-	rnd	b1804	ribonuclease D	8	82	1
1908518	1908291	-	yebO	b1825	putative inner membrane protein	37	376	1
3447408	3446929	-	rplE	b3308	50S ribosomal subunit protein L5	2666	27009	0.404607
3450203	3449931	-	rplV	b3315	50S ribosomal subunit protein L22	936	9481	1
425041	426051	+	queA	b0405	S-adenosylmethionine:tRNA ribosyltransferase-isomerase	13	131	1
21048	20845	-	rpsT	b0023	30S ribosomal subunit protein S20	1613	16241	1
507234	507257	+	chiX	b4585	-	161	1620	1
157702	157283	-	folK	b0142	2-amino-4-hydroxy-6-hydroxymethyldihyropteridine pyrophosphokinase	9	90	1
1004798	1005748	+	pyrD	b0945	dihydro-orotate oxidase, FMN-linked	5	50	1
1044646	1044260	-	etp	b0982	Protein-tyrosine-phosphatase, role in O-antigen capsule formation; dephosphorylates Etk-P	2	20	1
1087816	1086551	-	pgaC	b1022	biofilm PGA synthase PgaCD, catalytic subunit; poly-beta-1,6-N-acetyl-D-glucosamine synthase; c-di-GMP-stimulated activity and dimerization	1	10	1
1989711	1990862	+	tyrP	b1907	tyrosine transporter	4	40	1
4348714	4347434	-	dcuB	b4123	C4-dicarboxylate transporter, anaerobic; DcuS co-sensor	1	10	1
2372587	2372862	+	arnE	b4544	undecaprenyl phosphate-alpha-L-ara4N exporter; flippase ArnEF subunit	1	10	1
2942726	2942871	+	gcvB	b4443	-	211	2104	1
1342688	1342954	+	yciH	b1282	initiation factor function partial mimic, SUI1 family	10	99	1
2248502	2247093	-	lysP	b2156	lysine transporter	36	355	1
2699693	2699893	+	yfhL	b2562	putative 4Fe-4S cluster-containing protein	21	206	1
4178477	4178845	+	rplK	b3983	50S ribosomal subunit protein L11	1740	17061	1
441579	442967	+	thiI	b0423	tRNA s(4)U8 sulfurtransferase	14	137	1
1705280	1705660	+	ydgK	b1626	DUF2569 family inner membrane protein	15	146	1
2430208	2428751	-	purF	b2312	amidophosphoribosyltransferase	10	96	1
3922021	3921266	-	atpB	b3738	F0 sector of membrane-bound ATP synthase, subunit a	274	2630	1
2876611	2877588	+	iap	b2753	aminopeptidase in alkaline phosphatase isozyme conversion	2	19	1
4127864	4127316	-	yiiX	b3937	putative lipid binding hydrolase, DUF830 family protein	2	19	1
1144970	1145869	+	rluC	b1086	23S rRNA pseudouridine(955,2504,2580) synthase	28	265	1
3648093	3648116	+	agrA	b4712	-	61	577	1
2741905	2742363	+	yfiR	b2603	putative periplasmic inhibitor of YfiN activity	9	85	1
889789	888164	-	ybjL	b0847	putative transporter	6	56	1
1185564	1184488	-	potA	b1126	polyamine transporter subunit	18	168	1
4606256	4606230	-	leuP	b4369	Leu tRNA	31270	289246	1
1891237	1890602	-	tsaB	b1807	tRNA(ANN) t(6)A37 threonylcarbamoyladenosine modification protein; binding partner and protease for TsaD	24	220	1
3444509	3444135	-	rplO	b3301	50S ribosomal subunit protein L15	1410	12860	1
4606135	4606109	-	leuV	b4368	Leu tRNA	32271	291204	1
237365	238090	+	yafT	b0217	lipoprotein	1	9	1
278772	277786	-	afuC	b0262	CP4-6 prophage; putative ferric transporter subunit	1	9	1
820823	821476	+	ybhM	b0787	UPF0005 family inner membrane protein	1	9	1
2147704	2148996	+	yegD	b2069	Hsp70 chaperone family protein	1	9	1
2306724	2305138	-	mqo	b2210	malate dehydrogenase, FAD/NAD(P)-binding domain	2	18	1
2923754	2923032	-	truC	b2791	tRNA(Ile1,Asp) pseudouridine(65) synthase	3	27	1
4109960	4110655	+	cdh	b3918	CDP-diacylglycerol phosphotidylhydrolase	3	27	1
4491109	4490171	-	idnR	b4264	transcriptional repressor, 5-gluconate-binding	1	9	1
4606371	4606345	-	leuQ	b4370	Leu tRNA	32407	291318	1
3575101	3575634	+	yhgN	b3434	UPF0056 family inner membrane protein	8	71	1
4601487	4601008	-	dnaT	b4362	DNA biosynthesis protein (primosomal protein I)	7	62	1
3923650	3923087	-	rsmG	b3740	16S rRNA m(7)G527 methyltransferase, SAM-dependent; glucose-inhibited cell-division protein	12	106	1
1051491	1051643	+	cspG	b0990	cold shock protein homolog, cold-inducible	398	3498	1
3315984	3313372	-	infB	b3168	translation initiation factor IF-2	357	3130	1
1086489	1086136	-	pgaD	b1021	biofilm PGA synthase PgaCD, regulatory subunit; c-di-GMP-stimulated activity and dimerization	4	35	1
3441645	3441085	-	rpsD	b3296	30S ribosomal subunit protein S4	2078	18167	1
1709172	1710170	+	rsxD	b1630	SoxR iron-sulfur cluster reduction factor component; putative membrane protein of electron transport complex	7	61	1
1433644	1433114	-	pinR	b1374	Rac prophage; putative site-specific recombinase	3	26	1
1923096	1923284	+	ryeA	b4432	-	6	52	1
2702439	2701771	-	recO	b2565	gap repair protein	5	43	1
145111	146280	+	yadE	b0130	putative polysaccharide deacetylase lipoprotein	2	17	1
1920253	1921632	+	rsmF	b1835	16S rRNA m(5)C1407 methyltransferase, SAM-dependent	4	34	1
3881191	3880178	-	recF	b3700	gap repair protein	4	34	1
3952231	3952434	+	ilvM	b3769	acetolactate synthase 2 small subunit	2	17	1
2970450	2971103	+	ygdQ	b2832	UPF0053 family inner membrane protein	9	75	1
3446110	3445637	-	rplF	b3305	50S ribosomal subunit protein L6	1757	14562	1
1841520	1841867	+	nudG	b1759	CTP pyrophosphohydrolase; also hydrolyzes 2-hydroxy-dATP, 8-hydroxy-dGTP, 5-hydroxy-CTP, dCTP and 5-methyl-dCTP	4	33	1
2364245	2363763	-	yfaZ	b2250	outer membrane protein, putative porin	4	33	1
3883699	3882356	-	dnaA	b3702	chromosomal replication initiator protein DnaA, DNA-binding transcriptional dual regulator	26	214	1
2282547	2282771	+	rplY	b2185	50S ribosomal subunit protein L25	1297	10620	1
3884523	3884822	+	rnpA	b3704	protein C5 component of RNase P	17	139	1
4277499	4277903	+	soxR	b4063	redox-sensitive transcriptional activator of soxS; autorepressor	17	139	1
3350607	3350667	+	arcZ	b4450	-	60	487	1
2406611	2405733	-	lrhA	b2289	transcriptional repressor of flagellar, motility and chemotaxis genes	31	251	1
2691310	2691187	-	glmY	b4441	-	15	121	1
245775	245095	-	yafK	b0224	L,D-transpeptidase-related protein	17	137	1
3317976	3317584	-	rimP	b3170	ribosome maturation factor for 30S subunits	150	1201	1
291122	290679	-	insB1	b0274	IS1 transposase B	1	8	1
593148	590971	-	nfrB	b0569	bacteriophage N4 receptor, inner membrane subunit	1	8	1
1298628	1299215	+	ychE	b1242	UPF0056 family inner membrane protein	4	32	1
1611824	1610937	-	yneF	b1522	putative membrane-bound diguanylate cyclase	1	8	1
1910306	1911619	+	yebQ	b1828	putative transporter	1	8	1
2837395	2835203	-	hypF	b2712	carbamoyl phosphate phosphatase and maturation protein for [NiFe] hydrogenases	1	8	1
3267035	3266157	-	tdcA	b3118	tdc operon transcriptional activator	10	80	1
3700593	3701804	+	yhjV	b3539	putative transporter	3	24	1
3982988	3984163	+	aslB	b3800	putative AslA-specific sulfatase-maturating enzyme	1	8	1
4120319	4119453	-	menA	b3930	1,4-dihydroxy-2-naphthoate octaprenyltransferase	7	56	1
4544334	4544999	+	fimC	b4316	periplasmic chaperone	11	88	1
4548315	4548758	+	fimG	b4319	minor component of type 1 fimbriae	5	40	1
4548838	4549680	+	fimH	b4320	minor component of type 1 fimbriae	7	56	1
2109554	2108367	-	wzxB	b2037	putative polisoprenol-linked O-antigen transporter	27	214	1
2644253	2643159	-	rlmN	b2517	dual specificity 23S rRNA m(2)A2503, tRNA m(2)A37 methyltransferase, SAM-dependent	25	198	1
3444692	3444573	-	rpmD	b3302	50S ribosomal subunit protein L30	2406	19017	1
3982636	3982662	+	leuT	b3798	Leu tRNA	83563	659819	0.0778936
1184414	1183647	-	potB	b1125	polyamine transporter subunit	7	55	1
1712799	1714241	+	dtpA	b1634	dipeptide and tripeptide permease A	21	165	1
2695513	2691686	-	purL	b2557	phosphoribosylformyl-glycineamide synthetase	12	94	1
1622884	1622847	-	mgrR	b4698	-	62	484	1
3637380	3636238	-	yhiN	b3492	putative oxidoreductase	5	39	1
3920373	3919900	-	atpH	b3735	F1 sector of membrane-bound ATP synthase, delta subunit	250	1948	1
4547772	4548242	+	fimF	b4318	minor component of type 1 fimbriae	4	31	1
1192601	1192020	-	hflD	b1132	putative lysogenization regulator	36	277	1
710695	710669	-	uof	b4637	ryhB-regulated fur leader peptide	6	46	1
1191956	1190646	-	purB	b1131	adenylosuccinate lyase	67	513	1
3445567	3445274	-	rplR	b3304	50S ribosomal subunit protein L18	2321	17751	1
3311654	3311445	-	rpsO	b3165	30S ribosomal subunit protein S15	2642	20154	1
926413	926255	-	infA	b0884	translation initiation factor IF-1	369	2813	1
4441185	4439902	-	ytfL	b4218	UPF0053 family inner membrane protein	10	76	1
3793653	3792856	-	yibB	b3618	YibB family protein, function unknown	30	227	1
3442704	3442648	-	rpmJ	b3299	50S ribosomal subunit protein L36	2626	19796	1
1907030	1906281	-	rlmA	b1822	23S rRNA m(1)G745 methyltransferase, SAM-dependent	15	113	1
1326882	1327697	+	rluB	b1269	23S rRNA pseudouridine(2605) synthase	82	617	1
776372	777577	+	tolA	b0739	membrane anchored protein in TolA-TolQ-TolR complex	6	45	1
1617058	1618188	+	ydeA	b1528	arabinose efflux transporter, arabinose-inducible	2	15	1
2249747	2250736	+	yeiH	b2158	UPF0324 family inner membrane protein	12	90	1
2352344	2351046	-	glpT	b2240	sn-glycerol-3-phosphate transporter	4	30	1
3850106	3848664	-	uhpB	b3668	sensory histidine kinase in two-component regulatory sytem with UhpA	2	15	1
4607833	4608186	+	holD	b4372	DNA polymerase III, psi subunit	14	105	1
3195210	3195129	-	sibE	b4611	-	10	74	1
3445199	3444756	-	rpsE	b3303	30S ribosomal subunit protein S5	1576	11582	1
1979185	1978970	-	insA	b1894	IS1 repressor TnpA	3	22	1
2165698	2166999	+	yegQ	b2081	putative peptidase	23	168	1
1633102	1633275	+	ydfK	b1544	cold shock protein, function unknown, Qin prophage	24	175	1
961231	961854	+	cmk	b0910	cytidylate kinase	33	240	1
3800935	3800297	-	waaY	b3625	lipopolysaccharide core biosynthesis protein	19	138	1
668187	666346	-	mrdA	b0635	transpeptidase involved in peptidoglycan synthesis (penicillin-binding protein 2)	4	29	1
4261699	4262676	+	dusA	b4049	tRNA-dihydrouridine synthase A	22	159	1
4079781	4079939	+	yiiF	b3890	putative thymol sensitivity protein, CopG family putative transcriptional regulator	9	65	1
1737874	1738839	+	purR	b1658	transcriptional repressor, hypoxanthine-binding	53	380	1
774782	775126	+	ybgC	b0736	acyl-CoA thioester hydrolase	19	136	1
3074659	3074006	-	yggC	b2928	putative PanK family P-loop kinase	7	50	1
3312747	3311863	-	truB	b3166	tRNA pseudouridine synthase B: tRNA pseudouridine(55) synthase and putative tmRNA pseudouridine(342) synthase	38	270	1
1012031	1013224	+	pqiA	b0950	paraquat-inducible, SoxRS-regulated inner membrane protein	10	71	1
711868	711635	-	ybfE	b0685	LexA-regulated protein, CopB family	11	78	1
2758570	2757674	-	yfjH	b2623	CP4-57 prophage; uncharacterized protein	13	92	1
170605	171435	+	fhuD	b0152	iron-hydroxamate transporter subunit	1	7	1
177594	177031	-	yadS	b0157	UPF0126 family inner membrane protein	1	7	1
267975	267214	-	yafZ	b0252	CP4-6 prophage; conserved protein	1	7	1
944063	944866	+	dmsC	b0896	dimethyl sulfoxide reductase, anaerobic, subunit C	1	7	1
1230797	1231156	+	umuD	b1183	DNA polymerase V, subunit D	1	7	1
1423812	1425209	+	trkG	b1363	Rac prophage; potassium transporter subunit	3	21	1
1665345	1666541	+	clcB	b1592	H(+)/Cl(-) exchange transporter	1	7	1
2231049	2231684	+	yohK	b2142	LrgB family inner membrane protein	15	105	1
2843416	2843066	-	hycH	b2718	hydrogenase 3 maturation protein	1	7	1
2989334	2989756	+	yqeJ	b2848	uncharacterized protein	1	7	1
3799282	3798269	-	waaU	b3623	lipopolysaccharide core biosynthesis	16	112	1
3892795	3893694	+	yidZ	b3711	putative DNA-binding transcriptional regulator	2	14	1
3960707	3962668	+	rep	b3778	DNA helicase and single-stranded DNA-dependent ATPase	7	49	1
2476340	2476480	+	torI	b4501	response regulator inhibitor for tor operon	2	14	1
2105054	2104524	-	wbbJ	b2033	putative lipopolysaccharide biosynthesis O-acetyl transferase	118	823	1
323788	324423	+	ykgG	b0308	LutC family protein; putative electron transport chain YkgEFG component	52	361	1
2872790	2872539	-	ftsB	b2748	cell division protein	33	229	1
919090	918158	-	ybjX	b0877	DUF535 family protein	93	645	1
2107196	2106090	-	wbbH	b2035	O-antigen polymerase	28	193	1
3333421	3333170	-	rplU	b3186	50S ribosomal subunit protein L21	1343	9215	1
2214614	2212989	-	yehU	b2126	inner membrane putative sensory kinase in two-component system with YehT	14	96	1
4207502	4205973	-	purH	b4006	fused IMP cyclohydrolase/phosphoribosylaminoimidazolecarboxamide formyltransferase	13	89	1
1341951	1342628	+	pyrF	b1281	orotidine-5'-phosphate decarboxylase	19	130	1
3096413	3096643	+	yggU	b2953	UPF0235 family protein	6	41	1
1313633	1312950	-	yciC	b1255	UPF0259 family inner membrane protein	23	157	1
1183590	1182856	-	potC	b1124	polyamine transporter subunit	10	68	1
3804107	3803088	-	waaB	b3628	UDP-D-galactose:(glucosyl)lipopolysaccharide-1,6-D-galactosyltransferase	10	68	1
3807037	3805973	-	waaG	b3631	glucosyltransferase I	14	95	1
1029939	1028809	-	rlmI	b0967	23S rRNA m(5)C1962 methyltransferase, SAM-dependent	15	101	1
1739941	1741092	+	ydhC	b1660	putative arabinose efflux transporter	29	194	1
3439969	3439646	-	rplQ	b3294	50S ribosomal subunit protein L17	2606	17385	1
1395892	1394921	-	ynaI	b1330	mechanosensitive channel protein, very small conductance	6	40	1
3805920	3805183	-	waaP	b3630	kinase that phosphorylates core heptose of lipopolysaccharide	14	93	1
416922	415780	-	sbcD	b0398	exonuclease, dsDNA, ATP-dependent	8	53	1
2106027	2105095	-	wbbI	b2034	d-Galf:alpha-d-Glc beta-1,6-galactofuranosyltransferase	160	1058	1
491442	491933	+	apt	b0469	adenine phosphoribosyltransferase	33	218	1
4005894	4007663	+	recQ	b3822	ATP-dependent DNA helicase	5	33	1
568345	568617	+	emrE	b0543	DLP12 prophage; multidrug resistance protein	32	211	1
2437980	2438915	+	flk	b2321	putative flagella assembly protein	7	46	1
3175366	3173534	-	parE	b3030	DNA topoisomerase IV, subunit B	30	197	1
571484	572221	+	ybcM	b0546	DLP12 prophage; putative DNA-binding transcriptional regulator	2	13	1
733806	734072	+	ybfB	b0702	putative membrane protein	2	13	1
694925	693561	-	miaB	b0661	tRNA-i(6)A37 methylthiotransferase	41	265	1
3803028	3802069	-	waaR	b3627	UDP-D-galactose:(glucosyl)lipopolysaccharide-alpha-1,3-D-galactosyltransferase	11	71	1
182493	183590	+	cdaR	b0162	carbohydrate diacid regulon transcriptional regulator; autoregulator	16	103	1
3814524	3815060	+	slmA	b3641	nucleoid occlusion factor, anti-FtsZ division inhibitor	21	135	1
4180590	4180895	+	rplL	b3986	50S ribosomal subunit protein L7/L12	5674	36420	1
775879	776247	+	tolR	b0738	membrane spanning protein in TolA-TolQ-TolR complex	22	141	1
446636	445332	-	yajR	b0427	putative transporter	5	32	1
448016	447747	-	cyoD	b0429	cytochrome o ubiquinol oxidase subunit IV	130	830	1
1711553	1712128	+	nth	b1633	DNA glycosylase and apyrimidinic (AP) lyase (endonuclease III)	13	83	1
3015027	3014317	-	yqeC	b2876	putative selenium-dependent hydroxylase accessory protein	8	51	1
898548	899615	+	rlmC	b0859	23S rRNA m(5)U747 methyltransferase, SAM-dependent	3	19	1
1216098	1216310	+	ymgA	b1165	RcsB connector protein for regulation of biofilm	3	19	1
4383869	4385311	+	yjeM	b4156	putative transporter	3	19	1
4178909	4179553	+	rplA	b3984	50S ribosomal subunit protein L1	2151	13622	1
3948116	3948394	+	yifE	b3764	UPF0438 family protein	274	1727	1
1506811	1508712	+	ydcP	b1435	putative peptidase	10	63	1
3235845	3234769	-	rlmG	b3084	23S rRNA m(2)G1835 methyltransferase, SAM-dependent	7	44	1
2703356	2702511	-	era	b2566	membrane-associated, 16S rRNA-binding GTPase	59	370	1
4425148	4425483	+	rpsF	b4200	30S ribosomal subunit protein S6	2082	13052	1
2798465	2798121	-	stpA	b2669	DNA binding protein, nucleoid-associated	23	144	1
3885106	3886692	+	yidC	b3705	membrane protein insertase	42	262	1
590924	588012	-	nfrA	b0568	bacteriophage N4 receptor, outer membrane subunit	5	31	1
2909636	2908059	-	pyrG	b2780	CTP synthetase	105	651	1
3808570	3809787	+	waaA	b3633	3-deoxy-D-manno-octulosonic-acid transferase (KDO transferase)	8	49	1
3884366	3884446	+	rpmH	b3703	50S ribosomal subunit protein L34	1623	9910	1
500155	501399	+	gsk	b0477	inosine/guanosine kinase	19	116	1
3528699	3529307	+	yrfG	b3399	GMP/IMP nucleotidase	10	61	1
3477670	3477828	+	slyX	b3348	phi X174 lysis protein	41	249	1
2435606	2434854	-	truA	b2318	tRNA pseudouridine(38-40) synthase	15	91	1
1147397	1147510	+	rpmF	b1089	50S ribosomal subunit protein L32	4325	26126	1
892987	893403	+	ybjN	b0853	negative regulator of motility; multicopy suppressor of coaA(Ts)	53	320	1
171492	173414	+	fhuB	b0153	fused iron-hydroxamate transporter subunits of ABC superfamily: membrane components	1	6	1
873009	875297	+	yliE	b0833	putative membrane-anchored cyclic-di-GMP phosphodiesterase	1	6	1
1089827	1087869	-	pgaB	b1023	poly-beta-1,6-N-acetyl-D-glucosamine (PGA) N-deacetylase outer membrane export lipoprotein	1	6	1
1580760	1579663	-	ydeM	b1497	putative YdeN-specific sulfatase-maturating enzyme	1	6	1
1853949	1852651	-	ydjE	b1769	putative transporter	1	6	1
2587625	2590678	+	acrD	b2470	aminoglycoside/multidrug efflux system	1	6	1
2670420	2670878	+	hcaF	b2539	3-phenylpropionate dioxygenase, small (beta) subunit	1	6	1
2768695	2769456	+	yfjQ	b2633	CP4-57 prophage; uncharacterized protein	1	6	1
2852166	2853227	+	hypD	b2729	hydrogenase maturation protein	1	6	1
2945812	2945066	-	tcdA	b2812	tRNA threonylcarbamoyladenosine dehydratase; sulfur acceptor for CsdA	15	90	1
2988532	2989281	+	yqeI	b2847	putative transcriptional regulator	1	6	1
3407637	3409028	+	panF	b3258	pantothenate:sodium symporter	3	18	1
3490799	3490296	-	pabA	b3360	aminodeoxychorismate synthase, subunit II	7	42	1
3966447	3967646	+	rho	b3783	transcription termination factor	184	1104	1
4382673	4383590	+	epmA	b4155	Elongation Factor P Lys34 lysyltransferase	7	42	1
4563573	4562773	-	yjiK	b4333	SdiA-regulated family putative membrane-anchored protein; putative phytase-like esterase	1	6	1
49853	50272	+	folA	b0048	dihydrofolate reductase	47	280	1
3317496	3316069	-	nusA	b3169	transcription termination/antitermination L factor	221	1311	1
3275312	3276823	+	garD	b3128	(D)-galactarate dehydrogenase	45	266	1
1434194	1434021	-	ynaE	b1375	cold shock protein, Rac prophage	34	199	1
1728377	1728964	+	rnt	b1652	ribonuclease T (RNase T)	12	70	1
1943444	1944169	+	znuB	b1859	zinc transporter subunit: membrane component of ABC superfamily	12	70	1
3808068	3807094	-	waaQ	b3632	lipopolysaccharide core biosynthesis protein	12	70	1
3378621	3378253	-	rplM	b3231	50S ribosomal subunit protein L13	2692	15624	1
15475	16527	+	insL1	b0016	IS186 transposase	5	29	1
3786868	3788067	+	envC	b3613	activator of AmiB,C murein hydrolases, septal ring factor	9	52	1
906723	905770	-	ybjS	b0868	putative NAD(P)H-dependent oxidoreductase with NAD(P)-binding Rossmann-fold domain	8	46	1
2719253	2719891	+	yfiP	b2583	DTW domain protein	4	23	1
3896804	3897409	+	yieH	b3715	phosphoenolpyruvate and 6-phosphogluconate phosphatase	4	23	1
2734265	2734183	-	ryfD	b4609	-	61	350	1
479888	479397	-	maa	b0459	maltose O-acetyltransferase	33	189	1
1293557	1294114	+	tdk	b1238	thymidine kinase/deoxyuridine kinase	34	194	1
2413500	2414642	+	ackA	b2296	acetate kinase A and propionate kinase 2	181	1027	1
2892244	2892549	+	queD	b2765	6-pyruvoyl tetrahydrobiopterin synthase (PTPS)	17	96	1
1258483	1257959	-	pth	b1204	peptidyl-tRNA hydrolase	33	185	1
2742413	2743579	+	yfiN	b2604	putative membrane-anchored diguanylate cyclase with an N-terminal periplasmic domain	5	28	1
3882291	3881251	-	dnaN	b3701	DNA polymerase III, beta subunit	55	306	1
3908336	3907623	-	pstB	b3725	phosphate transporter subunit	20	111	1
2313114	2313146	+	micF	b4439	-	76	421	1
3273527	3272817	-	garL	b3126	alpha-dehydro-beta-deoxy-D-glucarate aldolase	36	199	1
2517802	2515673	-	yfeA	b2395	putative diguanylate cyclase	2	11	1
3109125	3107050	-	speC	b2965	ornithine decarboxylase, constitutive	4	22	1
4001456	4002346	+	corA	b3816	magnesium/nickel/cobalt transporter	24	132	1
2357846	2357971	+	ypaA	b4543	uncharacterized protein	6	33	1
2618746	2618105	-	hda	b2496	ATPase regulatory factor involved in DnaA inactivation	27	147	1
1655643	1655377	-	ynfA	b1582	UPF0060 family inner membrane protein	16	87	1
1947346	1946885	-	ruvC	b1863	component of RuvABC resolvasome, endonuclease	23	125	1
2265480	2265992	+	yeiP	b2171	elongation factor P-like protein	58	314	1
1013289	1014869	+	pqiB	b0951	paraquat-inducible, SoxRS-regulated MCE domain protein	10	54	1
2816910	2816542	-	yqaA	b2689	COG1238 family inner membrane protein	5	27	1
3920858	3920448	-	atpF	b3736	F0 sector of membrane-bound ATP synthase, subunit b	329	1775	1
1877745	1878710	+	yeaP	b1794	diguanylate cyclase	28	151	1
4004892	4005701	+	pldA	b3821	outer membrane phospholipase A	23	124	1
1734465	1735220	+	mepH	b1655	murein DD-endopeptidase, space-maker hydrolase	8	43	1
196576	197868	+	rseP	b0176	inner membrane zinc RIP metalloprotease; RpoE activator, by degrading RseA; cleaved signal peptide endoprotease	30	161	1
30847	34008	+	carB	b0033	carbamoyl-phosphate synthase large subunit	11	59	1
2110989	2110168	-	rfbA	b2039	glucose-1-phosphate thymidylyltransferase	185	992	1
1960092	1961765	+	argS	b1876	arginyl-tRNA synthetase	50	268	1
4205901	4204672	-	purD	b4005	phosphoribosylglycinamide synthetase phosphoribosylamine-glycine ligase	17	91	1
2634040	2632634	-	guaB	b2508	IMP dehydrogenase	156	834	1
2432912	2431704	-	folC	b2315	bifunctional folylpolyglutamate synthase/ dihydrofolate synthase	15	80	1
2667816	2666737	-	hcaT	b2536	putative 3-phenylpropionic transporter	3	16	1
3056271	3056759	+	fau	b2912	5-formyltetrahydrofolate cyclo-ligase family protein	6	32	1
3801969	3801013	-	waaJ	b3626	UDP-D-glucose:(galactosyl)lipopolysaccharide glucosyltransferase	12	64	1
4136138	4136983	+	yijE	b3943	EamA-like transporter family protein	3	16	1
21437	22318	+	ribF	b0025	bifunctional riboflavin kinase/FAD synthetase	26	138	1
3637672	3639111	+	pitA	b3493	phosphate transporter, low-affinity; tellurite importer	27	143	1
3102822	3102163	-	trmI	b2960	tRNA m(7)G46 methyltransferase, SAM-dependent	32	169	1
4190457	4190357	-	sroH	b4691	-	38	200	1
1156807	1157544	+	ycfH	b1100	putative DNase	31	163	1
1210376	1211149	+	mcrA	b1159	putative 5-methylcytosine/5-hydroxymethylcytosine-specific restriction nuclease; 5-methylcytosine DNA binding protein; e14 prophage gene	4	21	1
3336464	3335265	-	murA	b3189	UDP-N-acetylglucosamine 1-carboxyvinyltransferase	68	356	1
3333089	3332892	-	rpmA	b3185	50S ribosomal subunit protein L27	1973	10314	1
1323250	1324071	+	yciV	b1266	PHP domain protein	9	47	1
3884846	3885043	+	yidD	b4557	membrane protein insertion efficiency factor, inner membrane protein, UPF0161 family	19	99	1
1243210	1243761	+	emtA	b1193	lytic murein endotransglycosylase E	24	125	1
3440999	3440070	-	rpoA	b3295	RNA polymerase, alpha subunit	1116	5802	1
448630	448076	-	cyoC	b0430	cytochrome o ubiquinol oxidase subunit III	103	535	1
205156	208578	+	dnaE	b0184	DNA polymerase III alpha subunit	11	57	1
453515	452100	-	ampG	b0433	muropeptide transporter	6	31	1
189904	190569	+	rpsB	b0169	30S ribosomal subunit protein S2	1911	9847	1
1791990	1791337	-	ydiV	b1707	anti-FlhD4C2 factor, inactive EAL family phosphodiesterase	7	36	1
2518843	2519175	+	yfeD	b2399	DUF1323 family putative DNA-binding protein	57	290	1
3647758	3647735	-	dinQ	b4613	UV-inducible membrane toxin, DinQ-AgrB type I toxin-antitoxin system	40	203	1
3056879	3056958	+	sibC	b4446	-	29	147	1
1704581	1704646	+	blr	b4409	beta-lactam resistance membrane protein; divisome-associated protein	60	304	1
3474051	3473572	-	rpsG	b3341	30S ribosomal subunit protein S7	2682	13464	1
74491	72941	-	thiP	b0067	thiamine, thiamine pyrophosphate ABC transporter permease; ThiBPQ thiamine, thiamine pyrophosphate importer	1	5	1
195707	196504	+	cdsA	b0175	CDP-diglyceride synthase	25	125	1
279651	279208	-	insB1	b0264	IS1 transposase B	1	5	1
305175	304525	-	ecpE	b0289	ECP production pilus chaperone	1	5	1
417919	419154	+	phoR	b0400	sensory histidine kinase in two-component regulatory system with PhoB	2	10	1
579910	580056	+	ybcW	b0559	DLP12 prophage; uncharacterized protein	7	35	1
768008	770581	+	mngB	b0732	alpha-mannosidase	1	5	1
853677	854735	+	ybiR	b0818	putative transporter	9	45	1
973371	972652	-	ycbC	b0920	DUF218 superfamily protein	1	5	1
1023853	1021760	-	yccS	b0960	putative transporter, FUSC superfamily inner membrane protein, tandem domains	4	20	1
1266124	1266897	+	prmC	b1212	N5-glutamine methyltransferase, modifies release factors RF-1 and RF-2	13	65	1
1324776	1326611	+	yciQ	b1268	enhancer of membrane protein expression; putative inner membrane protein	1	5	1
1468796	1467951	-	insD1	b1402	IS2 transposase TnpB	1	5	1
2005333	2005683	+	fliS	b1925	flagellar protein potentiates polymerization	1	5	1
2113031	2112006	-	rfbB	b2041	dTDP-glucose 4,6 dehydratase, NAD(P)-binding	84	420	1
2241638	2240658	-	galS	b2151	galactose- and fucose-inducible galactose regulon transcriptional isorepressor; mgl operon transcriptional repressor; autorepressor	9	45	1
2526826	2525960	-	yfeR	b2409	transcriptional regulator of yefH	2	10	1
2811457	2812569	+	emrA	b2685	multidrug efflux system	6	30	1
2871274	2870285	-	truD	b2745	tRNA(Glu) pseudouridine(13) synthase	35	175	1
2982152	2980794	-	araE	b2841	arabinose transporter	1	5	1
3843994	3845700	+	ade	b3665	cryptic adenine deaminase	5	25	1
4087032	4088027	+	yiiG	b3896	DUF3829 family lipoprotein	1	5	1
4385734	4385988	+	yjeO	b4158	inner membrane protein	1	5	1
1641524	1641369	-	cspB	b1557	Qin prophage; cold shock protein	338	1673	1
1936682	1937491	+	yebK	b1853	putative DNA-binding transcriptional regulator	18	89	1
3175976	3175455	-	yqiA	b3031	acyl CoA esterase	35	173	1
3781245	3781658	+	trmL	b3606	tRNA Leu mC34,mU34 2'-O-methyltransferase, SAM-dependent	16	79	1
697017	696993	-	leuW	b0672	Leu tRNA	11400	56248	1
3474522	3474208	-	rpsL	b3342	30S ribosomal subunit protein S12	3500	17204	1
1201002	1200817	-	xisE	b1141	e14 prophage; putative excisionase	9	44	1
3429993	3429796	-	yrdB	b3280	DUF1488 family protein	15	73	1
1682189	1682848	+	rstA	b1608	response regulator of RstAB two-component system, low Mg-responsive via PhoQP	14	68	1
1151969	1153150	+	fabF	b1095	3-oxoacyl-[acyl-carrier-protein] synthase II	241	1169	1
1193743	1192697	-	mnmA	b1133	tRNA(Gln,Lys,Glu) U34 2-thiouridylase, first step in mnm(5)-s(2)U34-tRNA synthesis	55	265	1
1592146	1590884	-	hipA	b1507	inactivating GltX kinase facilitating persister formation; toxin of HipAB TA pair; autokinase	5	24	1
4275011	4274790	-	yjcB	b4060	putative inner membrane protein	5	24	1
1267350	1268099	+	ychA	b1214	transglutaminase-like TPR-repeat protein	32	153	1
4177388	4177711	+	secE	b3981	preprotein translocase membrane subunit	207	988	1
1228845	1229246	+	ycgN	b1181	UPF0153 family cysteine cluster protein	30	143	1
4278036	4277957	-	ryjA	b4459	-	21	100	1
798401	797643	-	ybhA	b0766	pyridoxal phosphate (PLP) phosphatase	24	114	1
3866243	3864642	-	yidE	b3685	putative transporter	8	38	1
4004148	4003318	-	rarD	b3819	putative chloramphenical resistance permease	4	19	1
779628	780359	+	ybgF	b0742	periplasmic TolA-binding protein	154	730	1
2098271	2097351	-	wzzB	b2027	regulator of length of O-antigen component of lipopolysaccharide chains	84	397	1
415723	412637	-	sbcC	b0397	exonuclease, dsDNA, ATP-dependent	7	33	1
3584789	3585013	+	yrhB	b3446	stable heat shock chaperone	7	33	1
3097297	3098373	+	yggW	b2955	HemN family putative oxidoreductase	24	113	1
3919827	3918346	-	atpA	b3734	F1 sector of membrane-bound ATP synthase, alpha subunit	869	4086	1
1308818	1308931	+	yciY	b4595	uncharacterized protein	244	1147	1
450611	448680	-	cyoB	b0431	cytochrome o ubiquinol oxidase subunit I	177	829	1
1261845	1260958	-	prs	b1207	phosphoribosylpyrophosphate synthase	232	1085	1
1612295	1611996	-	yneG	b1523	DUF4186 family protein	6	28	1
2697827	2697384	-	tadA	b2559	tRNA-specific adenosine deaminase	18	84	1
4599411	4597180	-	opgB	b4359	phosphoglycerol transferases I and II	9	42	1
2857123	2859624	+	mutS	b2733	methyl-directed mismatch repair protein	22	102	1
3378177	3377845	-	rpsI	b3230	30S ribosomal subunit protein S9	2155	9986	1
396257	395160	-	ampH	b0376	D-alanyl-D-alanine-carboxypeptidase/endopeptidase; penicillin-binding protein; weak beta-lactamase	8	37	1
1948602	1948210	-	nudB	b1865	dihydroneopterin triphosphate pyrophosphatase	58	267	1
1154142	1155104	+	yceG	b1097	septation protein, ampicillin sensitivity	5	23	1
2585761	2587401	+	narQ	b2469	sensory histidine kinase in two-component regulatory system with NarP (NarL)	5	23	1
1265042	1266064	+	prfA	b1211	peptide chain release factor RF-1	36	165	1
1018269	1016569	-	ycbZ	b0955	putative peptidase	38	174	1
1953472	1954383	+	cmoB	b1871	tRNA (cmo5U34)-carboxymethyltransferase, carboxy-SAM-dependent	13	59	1
3277032	3277307	+	prlF	b3129	antitoxin of the SohA(PrlF)-YhaV toxin-antitoxin system	67	304	1
3473484	3471430	-	fusA	b3340	protein chain elongation factor EF-G, GTP-binding	1960	8859	0.747568
4426138	4426527	+	rplI	b4203	50S ribosomal subunit protein L9	1823	8210	1
37794	36301	-	caiC	b0037	putative crotonobetaine/carnitine-CoA ligase	2	9	1
468901	470613	+	mdlA	b0448	putative multidrug transporter subunit of ABC superfamily, ATP-binding component	4	18	1
969419	970591	+	ycaQ	b0916	DUF1006 family protein with C-terminal wHTH domain	2	9	1
2099583	2098477	-	ugd	b2028	UDP-glucose 6-dehydrogenase	2	9	1
2181126	2182031	+	yegV	b2100	putative kinase	2	9	1
2430733	2430305	-	cvpA	b2313	colicin V production membrane protein	14	63	1
2622264	2622842	+	purN	b2500	phosphoribosylglycinamide formyltransferase 1	18	81	1
2947148	2946111	-	mltA	b2813	membrane-bound lytic murein transglycosylase A	8	36	1
3241714	3241223	-	ygjV	b3090	Imp-YgjV family inner membrane protein	2	9	1
3841709	3840579	-	nepI	b3662	putative transporter	2	9	1
4126780	4124642	-	priA	b3935	Primosome factor n' (replication factor Y)	6	27	1
4235936	4236118	+	yjbE	b4026	extracellular polysaccharide production threonine-rich protein	14	63	1
3970163	3971233	+	wecB	b3786	UDP-N-acetyl glucosamine-2-epimerase	23	103	1
297066	295726	-	intF	b0281	CP4-6 prophage; putative phage integrase	34	152	1
2110108	2109611	-	rfbC	b2038	dTDP-4-deoxyrhamnose-3,5-epimerase	149	666	1
1155154	1155735	+	tmk	b1098	thymidylate kinase	37	165	1
3967946	3968989	+	wecA	b3784	UDP-GlcNAc:undecaprenylphosphate GlcNAc-1-phosphate transferase	24	107	1
1146619	1146727	+	psrD	b4418	-	11	49	1
2746155	2745967	-	rpsP	b2609	30S ribosomal subunit protein S16	2514	11186	1
1987929	1987903	-	azuC	b4663	acid-inducible small membrane-associated protein	34	151	1
660186	659281	-	lipA	b0628	lipoate synthase	244	1083	1
2065192	2064509	-	cobS	b1992	cobalamin synthase	14	62	1
855993	857525	+	ybiT	b0820	putative transporter subunit of ABC superfamily: ATP-binding component	38	168	1
2212932	2212273	-	yehT	b2125	putative response regulator in two-component system withYehU	31	137	1
3822430	3824478	+	spoT	b3650	bifunctional (p)ppGpp synthetase II/ guanosine-3',5'-bis pyrophosphate 3'-pyrophosphohydrolase	27	119	1
3339218	3338496	-	mlaE	b3194	ABC transporter maintaining OM lipid asymmetry, inner membrane permease protein	38	167	1
1908736	1908653	-	mgrB	b1826	regulatory peptide for PhoPQ, feedback inhibition	113	496	1
4086046	4086819	+	fdhD	b3895	formate dehydrogenase formation protein	13	57	1
2297614	2297051	-	ccmA	b2201	heme exporter subunit	8	35	1
3144134	3143016	-	hybB	b2995	putative hydrogenase 2 cytochrome b type component	76	331	1
204523	205059	+	rnhB	b0183	ribonuclease HII, degrades RNA of DNA-RNA hybrids	31	135	1
421016	422329	+	proY	b0402	proline-specific permease	12	52	1
594740	593358	-	cusS	b0570	sensory histidine kinase in two-component regulatory system with CusR, senses copper ions	3	13	1
3671864	3671322	-	yhjB	b3520	putative DNA-binding transcriptional response regulator	3	13	1
3977555	3978574	+	wecF	b4481	TDP-Fuc4NAc:lipidIIFuc4NAc transferase	6	26	1
3921159	3920980	-	atpE	b3737	F0 sector of membrane-bound ATP synthase, subunit c	3149	13623	1
3313148	3312807	-	rbfA	b3167	30s ribosome binding factor	296	1276	1
2948980	2947787	-	amiC	b2817	N-acetylmuramoyl-L-alanine amidase	14	60	1
1234687	1233206	-	nhaB	b1186	sodium:proton antiporter	25	107	1
1799719	1799423	-	rplT	b1716	50S ribosomal subunit protein L20	3876	16538	1
3327820	3328053	+	yhbY	b3180	RNA binding protein associated with pre-50S ribosomal subunits	225	960	1
3911495	3910515	-	pstS	b3728	periplasmic phosphate binding protein, high-affinity	4	17	1
4264344	4265699	+	dnaB	b4052	replicative DNA helicase	22	93	1
3926425	3926042	-	mioC	b3742	FMN-binding protein MioC	84	353	1
2279730	2278600	-	bcr	b2182	bicyclomycin/cysteine/sulfonamide efflux transporter	16	67	1
1510033	1511379	+	ydcR	b1439	putative DNA-binding transcriptional regulator/putative amino transferase	11	46	1
2615851	2614850	-	yfgO	b2493	putative UPF0118 family inner membrane permease	17	71	1
1799969	1799832	-	rpmI	b1717	50S ribosomal subunit protein L35	4105	17129	1
608095	609147	+	insL1	b0582	IS186 transposase	6	25	1
2712734	2712057	-	trmN	b2575	tRNA1(Val) (adenine(37)-N6)-methyltransferase	6	25	1
3809855	3810274	+	coaD	b3634	pantetheine-phosphate adenylyltransferase	20	83	1
112569	111886	-	zapD	b0102	FtsZ stabilizer	43	178	1
4058437	4060200	+	typA	b3871	GTP-binding protein	214	882	1
3176803	3176036	-	cpdA	b3032	3',5' cAMP phosphodiesterase	99	408	1
3784985	3784614	-	yibN	b3611	putative rhodanese-related sulfurtransferase	106	435	1
956602	954902	-	ycaO	b0905	ribosomal protein S12 methylthiotransferase accessory factor	25	102	1
2705279	2704365	-	lepB	b2568	leader peptidase (signal peptidase I)	43	175	1
4425869	4426036	+	rpsR	b4202	30S ribosomal subunit protein S18	1838	7471	1
3210513	3209560	-	tsaD	b3064	tRNA(ANN) t(6)A37 threonylcarbamoyladenosine modification protein; glycation binding protein	47	191	1
3561422	3560652	-	glpG	b3424	rhomboid intramembrane serine protease	19	77	1
3917345	3916023	-	atpD	b3732	F1 sector of membrane-bound ATP synthase, beta subunit	1033	4167	1
1005982	1006464	+	zapC	b0946	FtsZ stabilizer	65	261	1
268930	268127	-	ykfA	b0253	CP4-6 prophage; putative GTP-binding protein	3	12	1
289132	288434	-	yagI	b0272	CP4-6 prophage; putative DNA-binding transcriptional regulator	4	16	1
669877	669326	-	cobC	b0638	putative alpha-ribazole-5'-P phosphatase	5	20	1
973567	974292	+	smtA	b0921	putative S-adenosyl-L-methionine-dependent methyltransferase	10	40	1
1003469	1003924	+	ycbV	b0943	putative fimbrial-like adhesin protein	1	4	1
1030638	1030369	-	tusE	b0969	mnm(5)-s(2)U34-tRNA 2-thiolation sulfurtransferase	35	140	1
1064066	1065262	+	yccE	b1001	uncharacterized protein	1	4	1
1200776	1199709	-	intE	b1140	e14 prophage; putative integrase	3	12	1
1285879	1286496	+	narI	b1227	nitrate reductase 1, gamma (cytochrome b(NR)) subunit	2	8	1
1550491	1551315	+	fdnH	b1475	formate dehydrogenase-N, Fe-S (beta) subunit, nitrate-inducible	2	8	1
1551368	1551961	+	fdnI	b1476	formate dehydrogenase-N, cytochrome B556 (gamma) subunit, nitrate-inducible	1	4	1
1637077	1637427	+	ydfO	b1549	Qin prophage; uncharacterized protein	1	4	1
1722151	1724103	+	ydhK	b1645	putative efflux protein (PET) component of YdhJK efflux pump	1	4	1
1810241	1810771	+	ydjM	b1728	inner membrane protein regulated by LexA	2	8	1
2042398	2042868	+	yodB	b1974	cytochrome b561 homolog	1	4	1
2154046	2155233	+	mdtA	b2074	multidrug efflux system, subunit A	1	4	1
2560287	2560868	+	yffL	b2443	CPZ-55 prophage; uncharacterized protein	2	8	1
2671255	2672007	+	hcaB	b2541	2,3-dihydroxy-2,3-dihydrophenylpropionate dehydrogenase	1	4	1
2879742	2878885	-	ygbT	b2755	multifunctional endonuclease Cas1, CRISPR adaptation protein; DNA repair enzyme	1	4	1
2969692	2970321	+	mutH	b2831	methyl-directed mismatch repair protein	5	20	1
3079300	3078917	-	cmtB	b2934	putative mannitol-specific enzyme IIA component of PTS	1	4	1
3522721	3522002	-	hofM	b3395	DNA catabolic putative pilus assembly protein	3	12	1
4011106	4011945	+	yigM	b3827	putative inner membrane EamA-like transporter	1	4	1
4257772	4259091	+	dinF	b4044	oxidative stress resistance protein; putative MATE family efflux pump; UV and mitomycin C inducible protein	3	12	1
4385423	4385677	+	yjeN	b4157	uncharacterized protein	1	4	1
4410163	4410504	+	yjfI	b4181	DUF2170 family protein	1	4	1
3811644	3811468	-	rpmB	b3637	50S ribosomal subunit protein L28	2388	9508	1
3915942	3915583	-	atpC	b3731	F1 sector of membrane-bound ATP synthase, epsilon subunit	487	1933	1
4123309	4122410	-	ftsN	b3933	essential cell division protein	21	83	1
3972552	3973559	+	rffG	b3788	dTDP-glucose 4,6-dehydratase	18	71	1
2280453	2279818	-	rsuA	b2183	16S rRNA pseudouridine(516) synthase	80	315	1
3518456	3517428	-	aroB	b3389	3-dehydroquinate synthase	48	189	1
668685	668278	-	rlmH	b0636	23S rRNA m(3)Psi1915 pseudouridine methyltransferase, SAM-dependent	21	82	1
2553255	2554094	+	hemF	b2436	coproporphyrinogen III oxidase	10	39	1
2658905	2657115	-	hscA	b2526	DnaK-like molecular chaperone specific for IscU	56	218	1
3091164	3091835	+	rsmE	b2946	16S rRNA m(3)U1498 methyltransferase, SAM-dependent	9	35	1
2104479	2103421	-	wbbK	b2032	lipopolysaccharide biosynthesis protein	99	384	1
2941601	2941266	-	ygdD	b2807	UPF0382 family inner membrane protein	40	155	1
3103043	3104035	+	mutY	b2961	adenine DNA glycosylase	8	31	1
162135	164504	+	hrpB	b0148	putative ATP-dependent helicase	7	27	1
3140288	3140007	-	hybF	b2991	protein involved with the maturation of hydrogenases 1 and 2	19	73	1
113189	112629	-	coaE	b0103	dephospho-CoA kinase	12	46	1
1874382	1874768	+	yeaL	b1789	UPF0756 family putative inner membrane protein	6	23	1
4074699	4075424	+	yihW	b3884	DeoR family putative transcriptional regulator	12	46	1
855714	854854	-	ldtB	b0819	L,D-transpeptidase linking Lpp to murein	83	318	1
77418	77489	+	sgrT	b4662	inhibitor of glucose uptake	23	88	1
1715859	1715056	-	pdxY	b1636	pyridoxamine kinase	50	191	1
2755623	2755925	+	ssrA	b2621	-	54039	206372	1
486566	489868	+	mscK	b0465	mechanosensitive channel protein, intermediate conductance, K+ regulated	11	42	1
4265812	4266831	+	alr	b4053	alanine racemase, biosynthetic, PLP-binding	22	84	1
3515883	3515107	-	dam	b3387	DNA adenine methyltransferase	16	61	1
4466150	4464789	-	treB	b4240	fused trehalose(maltose)-specific PTS enzyme: IIB component/IIC component	634	2417	1
303021	303575	+	yagU	b0287	DUF1440 family inner membrane protein	78	297	1
4022248	4022703	+	tatB	b3838	TatABCE protein translocation system subunit	51	194	1
3800166	3799375	-	waaZ	b3624	lipopolysaccharide core biosynthesis protein	18	68	1
3271740	3270655	-	garK	b3124	glycerate kinase I	13	49	1
3146231	3145173	-	hybO	b2997	hydrogenase 2, small subunit	258	971	1
1277588	1275852	-	narX	b1222	sensory histidine kinase in two-component regulatory system with NarL	4	15	1
1737260	1736151	-	ydhP	b1657	putative transporter	4	15	1
2829077	2829790	+	srlR	b2707	sorbitol-inducible srl operon transcriptional repressor	12	45	1
3204724	3205281	+	plsY	b3059	putative glycerol-3-phosphate acyltransferase	8	30	1
4023584	4024306	+	tatD	b4483	quality control of Tat-exported FeS proteins; Mg-dependent cytoplasmic DNase	15	56	1
968396	969322	+	lpxK	b0915	lipid A 4'kinase	14	52	1
2111946	2111107	-	rfbD	b2040	dTDP-4-dehydrorhamnose reductase subunit, NAD(P)-binding, of dTDP-L-rhamnose synthase	77	286	1
3382230	3383237	+	degS	b3235	serine endoprotease, periplasmic	7	26	1
1263744	1264940	+	hemA	b1210	glutamyl tRNA reductase	48	178	1
2871750	2871331	-	ispF	b2746	2C-methyl-D-erythritol 2,4-cyclodiphosphate synthase	85	315	1
4625942	4627264	+	radA	b4389	DNA repair protein	10	37	1
2663293	2662613	-	trmJ	b2532	tRNA mC32,mU32 2'-O-methyltransferase, SAM-dependent	210	771	1
3322128	3322102	-	leuU	b3174	Leu tRNA	104300	382665	1
3277367	3277771	+	yhaV	b3130	toxin of the SohB(PrlF)-YhaV toxin-antitoxin system	12	44	1
3366956	3367612	+	yhcF	b3219	putative transcriptional regulator	3	11	1
3544912	3545535	+	gntX	b3413	DNA catabolic protein	3	11	1
3976308	3977498	+	wzxE	b3792	O-antigen translocase	3	11	1
2644834	2644463	-	ndk	b2518	multifunctional nucleoside diphosphate kinase and apyrimidinic endonuclease and 3'-phosphodiesterase	159	581	1
3399948	3398905	-	mreC	b3250	cell wall structural complex MreBCD transmembrane component MreC	17	62	1
1122577	1121591	-	pyrC	b1062	dihydro-orotase	31	113	1
4375627	4374659	-	epmB	b4146	EF-P-Lys34 lysylation protein; weak lysine 2,3-aminomutase	19	69	1
4112345	4112725	+	yiiR	b3921	DUF805 family putative inner membrane protein	8	29	1
2531493	2532194	+	cysZ	b2413	EI24 family inner membrane protein; putative sulfate transporter	29	105	1
662248	661667	-	lipB	b0630	octanoyltransferase; octanoyl-[ACP]:protein N-octanoyltransferase	13	47	1
2747992	2748723	+	ypjD	b2611	cytochrome c assembly protein family inner membrane protein	18	65	1
219564	218917	-	tsaA	b0195	tRNA-Thr(GGU) m(6)t(6)A37 methyltransferase, SAM-dependent	10	36	1
260418	261461	+	proB	b0242	gamma-glutamate kinase	30	108	1
492122	493993	+	dnaX	b0470	DNA polymerase III/DNA elongation factor III, tau and gamma subunits	30	108	1
2700968	2700648	-	acpS	b2563	holo-[acyl-carrier-protein] synthase 1	20	72	1
3918235	3917432	-	atpG	b3733	F1 sector of membrane-bound ATP synthase, gamma subunit	311	1119	1
643937	643587	-	rnk	b0610	regulator of nucleoside diphosphate kinase	113	406	1
3602717	3602109	-	ftsE	b3463	putative ABC superfamily transporter ATP-binding subunit	66	237	1
3519034	3518573	-	aroK	b3390	shikimate kinase I	130	466	1
531196	530162	-	mnmH	b0503	tRNA 2-selenouridine synthase, selenophosphate-dependent	9	32	1
2038122	2036824	-	yedV	b1968	putative sensory kinase in two-component regulatory system with YedW	9	32	1
2089435	2089241	-	yoeB	b4539	toxin of the YoeB-YefM toxin-antitoxin system	45	160	1
3338431	3337940	-	mlaD	b3193	ABC transporter maintaining OM lipid asymmetry, anchored periplasmic binding protein	78	276	1
2931085	2931780	+	ygdG	b2798	Ssb-binding protein, misidentified as ExoIX	23	81	1
4022766	4023482	+	tatC	b3839	TatABCE protein translocation system subunit	29	102	1
494435	494980	+	recR	b0472	gap repair protein	39	137	1
2968947	2968477	-	rppH	b2830	RNA pyrophosphohydrolase	55	193	1
795892	796521	+	modB	b0764	molybdate transporter subunit	4	14	1
1024318	1023932	-	yccF	b0961	DUF307 family inner membrane protein	68	238	1
1044180	1042060	-	etk	b0981	tyrosine-protein kinase, role in O-antigen capsule formation	2	7	1
1116837	1117829	+	yceA	b1055	putative rhodanese-related sulfurtransferase	14	49	1
1922939	1922343	-	pphA	b1838	serine/threonine-specific protein phosphatase 1	2	7	1
2065734	2065249	-	cobU	b1993	bifunctional cobinamide kinase/ cobinamide phosphate guanylyltransferase	6	21	1
2299548	2298745	-	napH	b2204	ferredoxin-type protein essential for electron transfer from ubiquinol to periplasmic nitrate reductase (NapAB)	2	7	1
2672077	2673219	+	hcaD	b2542	phenylpropionate dioxygenase, ferredoxin reductase subunit	2	7	1
3540437	3542698	+	feoB	b3409	fused ferrous iron transporter, protein B: GTP-binding protein/membrane protein	4	14	1
3648965	3650194	+	arsB	b3502	arsenite/antimonite transporter	2	7	1
3931346	3933154	+	kup	b3747	potassium transporter	6	21	1
3974497	3975111	+	wecD	b3790	TDP-fucosamine acetyltransferase	6	21	1
4174996	4174106	-	coaA	b3974	pantothenate kinase	18	63	1
4504088	4505245	+	yjhB	b4279	putative transporter	2	7	1
4633827	4634414	+	ytjC	b4395	phosphatase	58	203	1
1940163	1939252	-	lpxM	b1855	myristoyl-acyl carrier protein (ACP)-dependent acyltransferase	53	185	1
2869489	2868923	-	pcm	b2743	L-isoaspartate protein carboxylmethyltransferase type II	31	108	1
2707094	2705355	-	lepA	b2569	back-translocating elongation factor EF4, GTPase	87	302	1
4127043	4127195	+	rpmE	b3936	50S ribosomal subunit protein L31	3439	11918	1
1628382	1629008	+	rspR	b1540	transcriptional repressor for rspAB	50	173	1
4163669	4165453	+	btuB	b3966	vitamin B12/cobalamin outer membrane transporter	37	128	1
233925	232627	-	mltD	b0211	putative membrane-bound lytic murein transglycosylase D	64	221	1
3512314	3511469	-	yhfZ	b3383	putative DNA-binding transcriptional regulator	9	31	1
194933	195634	+	ispU	b0174	undecaprenyl pyrophosphate synthase	49	168	1
1601211	1600318	-	lsrR	b1512	lsr operon transcriptional repressor	7	24	1
2498701	2500338	+	ypdA	b2380	sensor kinase regulating yhjX; pyruvate-responsive YpdAB two-component system	7	24	1
3095128	3095772	+	yggS	b2951	UPF0001 family protein, PLP-binding	35	120	1
484373	481284	-	acrB	b0462	multidrug efflux system protein	27	92	1
735680	736189	+	ybfC	b0704	putative periplasmic protein	5	17	1
2381638	2382495	+	rbn	b2268	RNase BN, tRNA processing enzyme	18	61	1
190887	191678	+	tsf	b0170	translation elongation factor EF-Ts	1679	5688	1
1620019	1620177	+	marB	b1532	mar operon regulator, periplasmic	16	54	1
2518497	2518781	+	yfeC	b2398	DUF1323 family putative DNA-binding protein	48	162	1
3036252	3035214	-	prfB	b2891	peptide chain release factor RF-2	144	486	1
3483232	3484194	+	yheT	b3353	UPF0017 family putative hydrolase	8	27	1
930932	929226	-	cydD	b0887	fused glutathione, cysteine exporter subunits of ABC superfamily: membrane component/ATP-binding component	32	107	1
532481	532903	+	allA	b0505	ureidoglycolate lyase, releasing urea	6	20	1
553910	553248	-	lpxH	b0524	UDP-2,3-diacylglucosamine pyrophosphohydrolase	6	20	1
2212166	2211756	-	yehS	b2124	DUF1456 family protein	57	190	1
3481319	3483172	+	yheS	b3352	putative transporter subunit of ABC superfamily: ATP-binding component	18	60	1
3824545	3825174	+	trmH	b3651	tRNA mG18-2'-O-methyltransferase, SAM-dependent	27	90	1
3825240	3827261	+	recG	b3652	ATP-dependent DNA helicase	6	20	1
4009029	4008469	-	rhtB	b3824	homoserine, homoserine lactone and S-methyl-methionine efflux pump	3	10	1
2748804	2750030	+	yfjD	b4461	UPF0053 family inner membrane protein	12	40	1
4530503	4530285	-	sgcB	b4565	putative enzyme IIB component of PTS	6	20	1
2009509	2009682	+	yedF	b1930	putative TusA family sulfurtransferase	95	316	1
3998013	4000115	+	uvrD	b3813	DNA-dependent ATPase I and helicase II	46	153	1
3145110	3144184	-	hybA	b2996	hydrogenase 2 4Fe-4S ferredoxin-type component	111	369	1
3163451	3162774	-	plsC	b3018	1-acyl-sn-glycerol-3-phosphate acyltransferase	31	103	1
4337899	4337198	-	adiY	b4116	adi system transcriptional activator	55	182	1
57394	58149	+	djlA	b0055	membrane-anchored DnaK co-chaperone, DNA-binding protein	17	56	1
1233000	1232530	-	dsbB	b1185	oxidoreductase that catalyzes reoxidation of DsbA protein disulfide isomerase I	41	135	1
2290530	2291117	+	narP	b2193	response regulator in two-component regulatory system with NarQ or NarX	97	319	1
1500603	1501535	+	tehA	b1429	potassium-tellurite ethidium and proflavin transporter	7	23	1
4394037	4392958	-	queG	b4166	epoxyqueuosine reductase, cobalamine-stimulated; queosine biosynthesis	14	46	1
2744500	2744213	-	rplS	b2606	50S ribosomal subunit protein L19	5325	17486	1
4177773	4178258	+	nusG	b3982	transcription termination factor	306	1003	1
3933381	3933740	+	rbsD	b3748	putative cytoplasmic sugar-binding protein	151	494	1
2632505	2630988	-	guaA	b2507	GMP synthetase (glutamine aminotransferase)	207	677	1
4262870	4263052	+	pspG	b4050	phage shock protein G	15	49	1
1393257	1394810	+	mppA	b1329	murein tripeptide (L-ala-gamma-D-glutamyl-meso-DAP) transporter subunit	27	88	1
2215687	2215734	+	yohO	b4542	putative membrane protein	259	844	1
3146707	3146480	-	yghW	b2998	DUF2623 family protein	4	13	1
3204101	3203340	-	bacA	b3057	undecaprenyl pyrophosphate phosphatase	20	65	1
1049863	1050078	+	insA	b4516	IS1 repressor TnpA	16	52	1
3141256	3140822	-	hybD	b2993	maturation protease for hydrogenase 2	61	198	1
3149441	3149007	-	yqhA	b3002	UPF0114 family putative inner membrane protein	41	133	1
1177350	1178534	+	lolE	b1118	lipoprotein-releasing system transmembrane protein	37	120	1
2914970	2913729	-	rlmD	b2785	23S rRNA m(5)U1939 methyltransferase, SAM-dependent	21	68	1
2167490	2167332	-	ogrK	b2082	positive regulator of P2 growth (insertion of P2 ogr gene into the chromosome)	38	123	1
3040793	3040446	-	cptA	b2896	toxin of CptAB toxin-antitoxin pair	34	110	1
2428596	2428087	-	ubiX	b2311	3-octaprenyl-4-hydroxybenzoate carboxy-lyase	13	42	1
2270009	2270515	+	mepS	b2175	murein DD-endopeptidase, space-maker hydrolase, mutational suppressor of prc thermosensitivity, outer membrane lipoprotein	527	1702	1
1952732	1953415	+	cmoA	b1870	carboxy-SAM synthase	22	71	1
4009200	4010162	+	pldB	b3825	lysophospholipase L2	14	45	1
1194921	1194328	-	rluE	b1135	23S rRNA pseudouridine(2457) synthase	38	122	1
3248469	3248792	+	mzrA	b3096	modulator of EnvZ/OmpR regulon	59	189	1
1682912	1684153	+	rstB	b1609	sensory histidine kinase of RstAB two-component system, low Mg-responsive via PhoQP	10	32	1
1850890	1851846	+	ansA	b1767	cytoplasmic L-asparaginase 1	30	96	1
4203350	4204615	+	zraR	b4004	fused DNA-binding response regulator in two-component regulatory system with ZraS: response regulator/sigma54 interaction protein	10	32	1
2419758	2419264	-	yfcE	b2300	phosphodiesterase activity on bis-pNPP	116	370	1
222615	221644	-	metN	b0199	DL-methionine transporter subunit	106	338	1
3812761	3813921	+	dfp	b3639	fused 4'-phosphopantothenoylcysteine decarboxylase/phosphopantothenoylcysteine synthetase, FMN-binding	60	191	1
3153593	3154192	+	yghB	b3009	general envelope maintenance protein; DedA family inner membrane protein	89	283	1
4025018	4026451	+	ubiD	b3843	3-octaprenyl-4-hydroxybenzoate decarboxylase	112	356	1
221591	220998	-	metI	b0198	DL-methionine transporter subunit	46	146	1
2513072	2514214	+	nupC	b2393	nucleoside (except guanosine) transporter	24	76	1
3543197	3544015	+	yhgA	b3411	transposase_31 family protein	6	19	1
666283	665231	-	mrdB	b0634	cell wall shape-determining protein	13	41	1
1788465	1789451	+	aroH	b1704	3-deoxy-D-arabino-heptulosonate-7-phosphate synthase, tryptophan repressible	26	82	1
729164	729310	+	ybfA	b0699	DUF2517 family protein	1268	3990	1
252739	253131	+	yafP	b0234	putative acyl-CoA transferase	7	22	1
3095850	3096356	+	yggT	b2952	putative inner membrane protein; compensates for loss in K+ uptake	70	220	1
3334939	3335157	+	sfsB	b3188	malPQ operon transcriptional activator	14	44	1
2108299	2107256	-	glf	b2036	UDP-galactopyranose mutase, FAD/NAD(P)-binding	332	1040	1
136434	135628	-	speE	b0121	spermidine synthase (putrescine aminopropyltransferase)	94	294	1
990326	989184	-	pncB	b0931	nicotinate phosphoribosyltransferase	41	128	1
3418420	3418581	+	yhdV	b3267	putative outer membrane protein	17	53	1
3716577	3717176	+	yiaD	b3552	multicopy suppressor of bamB; outer membrane lipoprotein	17	53	1
454137	453619	-	yajG	b0434	putative lipoprotein	104	324	1
3412651	3412770	+	yhdU	b3263	putative membrane protein	9	28	1
3140769	3140341	-	hybE	b2992	hydrogenase 2-specific chaperone	46	143	1
1647964	1648311	+	dicA	b1570	Qin prophage; putative regulator for DicB	120	373	1
1344316	1343627	-	yciT	b1284	global regulator of transcription; DeoR family	38	118	1
4559496	4558384	-	iadA	b4328	isoaspartyl dipeptidase	29	90	1
4406220	4406585	+	nsrR	b4178	nitric oxide-sensitive repressor for NO regulon	69	214	1
2450019	2449258	-	yfcO	b2332	DUF2544 family putative outer membrane protein	10	31	1
4004667	4004260	-	yigI	b3820	4HBT thioesterase family protein	31	96	1
2446354	2445590	-	mepA	b2328	murein DD-endopeptidase	21	65	1
3886858	3888162	+	mnmE	b3706	tRNA U34 5-methylaminomethyl-2-thiouridine modification GTPase	33	102	1
5264	5500	+	yaaX	b0005	DUF2502 family putative periplasmic protein	13	40	1
3234114	3233758	-	higA	b3082	antitoxinof the HigB-HigA toxin-antitoxin system	14	43	1
2966007	2965192	-	lgt	b2828	phosphatidylglycerol-prolipoprotein diacylglyceryl transferase	43	132	1
3210811	3210966	+	rpsU	b3065	30S ribosomal subunit protein S21	2381	7292	1
2824316	2823879	-	pncC	b2700	nicotinamide-nucleotide amidohydrolase; NMN amidohydrolase	65	199	1
1915504	1914866	-	proQ	b1831	RNA chaperone, putative ProP translation regulator	238	727	1
1155792	1156736	+	holB	b1099	DNA polymerase III, delta prime subunit	19	58	1
2740039	2738978	-	tyrA	b2600	fused chorismate mutase T/prephenate dehydrogenase	19	58	1
2153674	2153749	+	sibB	b4437	-	19	58	1
202131	202526	+	fabZ	b0180	(3R)-hydroxymyristol acyl carrier protein dehydratase	480	1462	1
1854824	1854126	-	ydjF	b1770	putative DNA-binding transcriptional regulator	29	88	1
2102881	2101925	-	insH1	b2030	IS5 transposase and trans-activator	30	91	1
3142959	3141316	-	hybC	b2994	hydrogenase 2, large subunit	183	555	1
2448410	2447538	-	prmB	b2330	N5-glutamine methyltransferase	113	342	1
451580	450693	-	cyoA	b0432	cytochrome o ubiquinol oxidase subunit II	348	1051	1
208651	209550	+	accA	b0185	acetyl-CoA carboxylase, carboxytransferase, alpha subunit	180	543	1
427677	429464	+	secD	b0408	SecYEG protein translocase auxillary subunit	62	187	1
20284	19841	-	insB1	b0021	IS1 transposase B	1	3	1
161456	160812	-	sfsA	b0146	sugar fermentation stimulation protein A	39	117	1
169808	170545	+	fhuC	b0151	iron-hydroxamate transporter subunit	3	9	1
340195	341085	+	yahI	b0323	carbamate kinase-like protein	1	3	1
545262	544087	-	allC	b0516	allantoate amidohydrolase	1	3	1
554641	555966	+	cysS	b0526	cysteinyl-tRNA synthetase	59	177	1
595413	594790	-	cusR	b0571	response regulator in two-component regulatory system with CusS	14	42	1
891997	892839	+	rimK	b0852	ribosomal protein S6 modification protein	14	42	1
1351730	1351437	-	ycjD	b1289	DUF559 family endonuclease-related protein	1	3	1
1432441	1432956	+	tfaR	b1373	Rac prophage; putative tail fiber assembly protein	1	3	1
1526970	1527122	+	yncH	b1455	IPR020099 family protein	1	3	1
1586456	1584237	-	ydeP	b1501	putative oxidoreductase	2	6	1
1640335	1640084	-	ydfR	b1555	Qin prophage; uncharacterized protein	1	3	1
1648538	1648633	+	ydfA	b1571	Qin prophage; uncharacterized protein	2	6	1
1838777	1839370	+	ynjD	b1756	putative ABC superfamily transporter ATP-binding subunit	2	6	1
1844841	1843861	-	ynjI	b1762	inner membrane protein	2	6	1
1879555	1879433	-	yoaG	b1796	uncharacterized protein	1	3	1
1904831	1905229	+	yobD	b1820	UPF0266 family inner membrane protein	16	48	1
1942692	1943387	+	znuC	b1858	zinc transporter subunit: ATP-binding component of ABC superfamily	30	90	1
2032287	2030929	-	dcm	b1961	DNA cytosine methyltransferase	17	51	1
2044968	2051984	+	yeeJ	b1978	putative adhesin	1	3	1
2061903	2061046	-	nac	b1988	nitrogen assimilation regulon transcriptional regulator; autorepressor	1	3	1
2180125	2181069	+	yegU	b2099	ADP-ribosylglycohydrolase family protein	5	15	1
2184486	2183746	-	thiD	b2103	bifunctional hydroxy-methylpyrimidine kinase/ hydroxy-phosphomethylpyrimidine kinase	2	6	1
2232908	2233567	+	sanA	b2144	vancomycin high temperature exclusion protein, DUF218 superfamily protein	4	12	1
2294874	2292991	-	ccmF	b2196	heme lyase, CcmF subunit	2	6	1
2320073	2321839	+	atoS	b2219	sensory histidine kinase in two-component regulatory system with AtoC	3	9	1
2370048	2370878	+	arnD	b2256	undecaprenyl phosphate-alpha-L-ara4FN deformylase	2	6	1
2562141	2562497	+	yffO	b2446	CPZ-55 prophage; uncharacterized protein	3	9	1
2715453	2715980	+	eamB	b2578	cysteine and O-acetylserine exporter	1	3	1
2812646	2814124	+	emrB	b2686	multidrug efflux system protein	3	9	1
2893949	2894149	+	ygcO	b2767	putative 4Fe-4S cluster-containing protein	13	39	1
2895749	2894949	-	ygcQ	b2769	putative flavoprotein	1	3	1
3031397	3032785	+	uacT	b2888	uric acid permease	1	3	1
3162639	3161287	-	ftsP	b3017	septal ring component that protects the divisome from stress; multicopy suppressor of ftsI(Ts)	27	81	1
3192238	3192807	+	yqiJ	b3050	DUF1449 family inner membrane protein	2	6	1
3499478	3499585	+	yhfL	b3369	small lipoprotein	8	24	1
3521942	3521463	-	hofN	b3394	DNA catabolic putative fimbrial assembly protein	1	3	1
3779084	3779800	+	lldR	b3604	dual role activator/repressor for lldPRD operon	10	30	1
3811122	3810373	-	mutM	b3635	formamidopyrimidine/5-formyluracil/ 5-hydroxymethyluracil DNA glycosylase	8	24	1
3856445	3856834	+	yidI	b3677	inner membrane protein	6	18	1
3909409	3908579	-	pstA	b3726	phosphate transporter subunit	4	12	1
4097766	4098542	+	rhaS	b3905	transcriptional activator of rhaBAD and rhaT	1	3	1
4146288	4147106	+	pflC	b3952	putative [formate-C-acetyltransferase 2]-activating enzyme; pyruvate formate-lyase 1-activating enzyme	1	3	1
4189816	4190295	+	yjaZ	b3989	stationary phase growth adaptation protein	1	3	1
4194174	4193599	-	thiE	b3993	thiamine phosphate synthase (thiamine phosphate pyrophosphorylase)	2	6	1
4201956	4203293	+	zraS	b4003	sensory histidine kinase in two-component regulatory system with ZraR	3	9	1
4513379	4512441	-	fecC	b4289	iron-dicitrate transporter subunit	1	3	1
4579307	4577988	-	mcrB	b4346	5-methylcytosine-specific restriction enzyme McrBC, subunit McrB	43	129	1
4589049	4588906	-	yjiX	b4353	DUF466 family protein	1	3	1
4602067	4601654	-	yjjB	b4363	DUF3815 family inner membrane protein	1	3	1
4624925	4625833	+	serB	b4388	3-phosphoserine phosphatase	14	42	1
3664894	3664938	+	gadY	b4452	-	37	111	1
4605834	4606010	+	yjjZ	b4567	uncharacterized protein	1	3	1
3683417	3682191	-	dctA	b3528	C4-dicarboxylic acid, orotate and citrate transporter	335	1004	1
191885	192550	+	pyrH	b0171	uridylate kinase	127	380	1
4172087	4173055	+	murB	b3972	UDP-N-acetylenolpyruvoylglucosamine reductase, FAD-binding	40	119	1
1014926	1015429	+	pqiC	b0952	DUF330 family putative lipoprotein	61	181	1
4106499	4107341	+	fieF	b3915	ferrous iron and zinc transporter	23	68	1
966651	968339	+	msbA	b0914	fused lipid transporter subunits of ABC superfamily: membrane component/ATP-binding component	45	133	1
4600159	4599725	-	yjjA	b4360	putative DUF2501 family periplasmic protein	42	124	1
1198207	1197563	-	ymfE	b1138	e14 prophage; putative inner membrane protein	40	118	1
832920	832498	-	ybiA	b0798	DUF1768 family protein	37	109	1
833100	835190	+	dinG	b0799	ATP-dependent DNA helicase	16	47	1
3322475	3322203	-	secG	b3175	preprotein translocase membrane subunit	550	1614	1
2754268	2754038	-	ratB	b2618	UPF0125 family protein	63	184	1
1312860	1312381	-	yciB	b1254	IspA family inner membrane protein	41	119	1
974349	975611	+	mukF	b0922	chromosome condensin MukBEF, kleisin-like subunit, binds calcium	48	139	1
1115460	1114294	-	mdtG	b1053	putative drug efflux system protein	9	26	1
3299885	3299502	-	yhbP	b3154	UPF0306 family protein	9	26	1
3742502	3741714	-	yiaJ	b3574	transcriptional repressor of yiaK-S operon	9	26	1
2284406	2286106	+	yejM	b2188	essential inner membrane DUF3413 domain-containing protein; lipid A production and membrane permeability factor	25	72	1
3612999	3613526	+	acpT	b3475	4'-phosphopantetheinyl transferase	25	72	1
507052	506633	-	ybaK	b0481	Cys-tRNA(Pro)/Cys-tRNA(Cys) deacylase	24	69	1
2030888	2030478	-	vsr	b1960	DNA mismatch endonuclease of very short patch repair	8	23	1
3813962	3814357	+	dut	b3640	deoxyuridinetriphosphatase	149	428	1
3235990	3236433	+	ygjP	b3085	putative metal dependent hydrolase	15	43	1
557711	556905	-	folD	b0529	bifunctional 5,10-methylene-tetrahydrofolate dehydrogenase/ 5,10-methylene-tetrahydrofolate cyclohydrolase	109	312	1
1699150	1698182	-	malI	b1620	transcriptional repressor of Mal regulon	7	20	1
713017	713502	+	seqA	b0687	negative modulator of initiation of replication	139	397	1
1809410	1810018	+	yniC	b1727	2-deoxyglucose-6-P phosphatase	46	131	1
2444721	2444233	-	epmC	b2326	Elongation Factor P Lys34 hydroxylase	26	74	1
63234	60388	-	rapA	b0059	RNA polymerase remodeling/recycling factor ATPase; RNA polymerase-associated, ATP-dependent RNA translocase	32	91	1
2283917	2282970	-	yejK	b2186	spermidine nucleoid-associated protein	57	162	1
2413102	2412707	-	yfbV	b2295	UPF0208 family inner membrane protein	126	358	1
2067291	2066335	-	insH1	b1994	IS5 transposase and trans-activator	25	71	1
670542	669961	-	nadD	b0639	nicotinic acid mononucleotide adenylyltransferase, NAD(P)-dependent	12	34	1
2141582	2139789	-	asmA	b2064	suppressor of OmpF assembly mutants; putative outer membrane protein assembly factor; inner membrane-anchored periplasmic protein	18	51	1
2955973	2952491	-	recB	b2820	exonuclease V (RecBCD complex), beta subunit	6	17	1
3679449	3680318	+	kdgK	b3526	2-dehydro-3-deoxygluconokinase	43	121	1
3640892	3642301	+	dtpB	b3496	dipeptide and tripeptide permease B	102	287	1
1656214	1656714	+	speG	b1584	spermidine N1-acetyltransferase	82	230	1
3401057	3400074	-	mreB	b3251	cell wall structural complex MreBCD, actin-like component MreB	267	748	1
2290051	2289095	-	insH1	b2192	IS5 transposase and trans-activator	35	98	1
3812529	3811921	-	yicR	b3638	UPF0758 family protein	5	14	1
4061195	4062115	+	yihM	b3873	putative sugar phosphate isomerase	10	28	1
4577928	4576942	-	mcrC	b4345	5-methylcytosine-specific restriction enzyme McrBC, subunit McrC	5	14	1
4608676	4609293	+	yjjG	b4374	dUMP phosphatase	54	151	1
2941213	2940173	-	rlmM	b2806	23S rRNA C2498 2'-O-ribose methyltransferase, SAM-dependent	24	67	1
3796978	3798177	+	waaL	b3622	O-antigen ligase	19	53	1
4607670	4606699	-	rsmC	b4371	16S rRNA m(2)G1207 methyltransferase, SAM-dependent	37	103	1
2637326	2635914	-	der	b2511	GTPase; multicopy suppressor of ftsJ	79	219	1
4600945	4600268	-	dnaC	b4361	DNA biosynthesis protein	26	72	1
1396106	1397062	+	insH1	b1331	IS5 transposase and trans-activator	64	177	1
77397	77563	+	sgrS	b4577	-	17	47	1
4024791	4024363	-	rfaH	b3842	transcription antitermination protein	21	58	1
2943367	2944512	+	csdA	b2810	cysteine sulfinate desulfinase	29	80	1
575723	574767	-	insH1	b0552	IS5 transposase and trans-activator	33	91	1
89664	90062	+	mraZ	b0081	RsmH methytransferase inhibitor	52	143	1
291316	291101	-	insA	b0275	IS1 repressor TnpA	8	22	1
1383931	1382993	-	ycjW	b1320	LacI family putative transcriptional repressor	8	22	1
1523035	1520993	-	yncD	b1451	putative iron outer membrane transporter	4	11	1
1967407	1967078	-	cheY	b1882	chemotaxis regulator transmitting signal to flagellar motor component	4	11	1
2851894	2852106	+	hypC	b2728	hydrogenase maturation protein	4	11	1
3073661	3072702	-	epd	b2927	D-erythrose 4-phosphate dehydrogenase	24	66	1
4173112	4174017	+	birA	b3973	bifunctional biotin-[acetylCoA carboxylase] holoenzyme synthetase/ DNA-binding transcriptional repressor, bio-5'-AMP-binding	32	88	1
1175457	1176596	+	lolC	b1116	lipoprotein-releasing system transmembrane protein	47	129	1
435167	435526	+	nusB	b0416	transcription antitermination protein	171	469	1
461945	463756	+	ppiD	b0441	periplasmic folding chaperone, has an inactive PPIase domain	66	181	1
2659437	2658982	-	hscB	b2527	HscA co-chaperone, J domain-containing protein Hsc56; IscU-specific chaperone HscAB	50	137	1
3788131	3789030	+	yibQ	b3614	putative polysaccharide deacetylase	15	41	1
4583018	4581489	-	hsdM	b4349	DNA methyltransferase M	45	123	1
3811387	3811280	-	rpmG	b3636	50S ribosomal subunit protein L33	1317	3599	1
1222958	1222674	-	ymgG	b1172	UPF0757 family protein	11	30	1
441071	440232	-	ispA	b0421	geranyltranstransferase	54	147	1
1841373	1840813	-	ynjF	b1758	inner membrane protein, phosphatidylglycerophosphate synthase homolog	7	19	1
3517276	3516050	-	damX	b3388	cell division protein that binds to the septal ring	77	208	1
4479507	4479064	-	yjgM	b4256	putative acetyltransferase	10	27	1
2657053	2656778	-	fdx	b2525	[2Fe-2S] ferredoxin	163	440	1
1262847	1262056	-	ispE	b1208	4-diphosphocytidyl-2-C-methylerythritol kinase	51	137	1
4448477	4448668	+	chpS	b4224	antitoxin of the ChpBS toxin-antitoxin system	137	368	1
690851	689373	-	lnt	b0657	apolipoprotein N-acyltransferase	19	51	1
585603	584710	-	ompT	b0565	DLP12 prophage; outer membrane protease VII (outer membrane protein 3b)	157	421	1
4165458	4166255	+	murI	b3967	glutamate racemase	83	222	1
3130208	3131164	+	insH1	b2982	IS5 transposase and trans-activator	67	179	1
1092906	1094204	+	ycdT	b1025	diguanylate cyclase, membrane-anchored	3	8	1
2552382	2553191	+	amiA	b2435	N-acetylmuramoyl-l-alanine amidase I	30	80	1
2915087	2917783	+	barA	b2786	hybrid sensory histidine kinase, in two-component regulatory system with UvrY	6	16	1
3866867	3866499	-	ibpB	b3686	heat shock chaperone	6	16	1
3980917	3982242	+	yifK	b3795	putative APC family amino acid transporter	3	8	1
4474023	4473370	-	bdcA	b4249	c-di-GMP-binding biofilm dispersal mediator protein	3	8	1
2528129	2527971	-	ypeB	b4546	DUF3820 family protein	6	16	1
111816	111679	-	yacG	b0101	DNA gyrase inhibitor	77	205	1
4181275	4185243	+	rpoB	b3987	RNA polymerase, beta subunit	404	1074	1
2414777	2416861	+	pta	b2297	phosphate acetyltransferase	188	499	1
2591637	2592704	+	dapE	b2472	N-succinyl-diaminopimelate deacylase	23	61	1
777770	779002	+	tolB	b0740	periplasmic protein	128	339	1
4326704	4326429	-	yjdM	b4108	zinc-ribbon family protein	552	1460	1
2419146	2418664	-	yfcD	b2299	putative NUDIX hydrolase	73	193	1
3139934	3139746	-	hybG	b2990	hydrogenase 2 accessory protein	101	266	1
3653168	3652212	-	insH1	b3505	IS5 transposase and trans-activator	30	79	1
4460334	4459930	-	nrdG	b4237	anaerobic ribonucleotide reductase activating protein	8	21	1
657908	657585	-	flc	b0624	fluoride efflux channel, dual topology membrane protein	45	118	1
3165943	3163745	-	parC	b3019	DNA topoisomerase IV, subunit A	39	102	1
1995329	1994733	-	uvrY	b1914	response regulator in two-component regulatory system with BarA	31	81	1
470666	472387	+	mdlB	b0449	putative multidrug transporter subunit of ABC superfamily, ATP-binding component	5	13	1
850067	849240	-	rhtA	b0813	threonine and homoserine efflux system	5	13	1
1092259	1089896	-	pgaA	b1024	biofilm adhesin polysaccharide PGA secretin; OM porin; poly-beta-1,6-N-acetyl-D-glucosamine export protein	5	13	1
3532409	3530745	-	yhgE	b3402	DUF4153 family putative inner membrane protein	5	13	1
4568489	4567317	-	mdtM	b4337	multidrug efflux system protein	5	13	1
455163	456401	+	tig	b0436	peptidyl-prolyl cis/trans isomerase (trigger factor)	859	2228	1
3336773	3336579	-	ibaG	b3190	acid stress protein; putative transcriptional regulator, BolA family	167	433	1
3184436	3183843	-	ribB	b3041	3,4-dihydroxy-2-butanone-4-phosphate synthase	195	504	1
4376347	4376412	+	ecnA	b4410	entericidin A membrane lipoprotein, antidote entericidin B	12	31	1
1234968	1235627	+	fadR	b1187	fatty acid metabolism regulon transcriptional regulator	146	377	1
4472365	4471490	-	pyrB	b4245	aspartate carbamoyltransferase, catalytic subunit	54	139	1
2270756	2272252	+	rtn	b2176	resistance protein for phages lambda and N4, putative membrane-anchored cyclic-di-GMP phosphodiesterase	7	18	1
2870244	2869543	-	umpG	b2744	broad specificity 5'(3')-nucleotidase and polyphosphatase	28	72	1
3435237	3436466	+	rsmB	b3289	16S rRNA m(5)C967 methyltransferase, SAM-dependent	74	190	1
2754734	2754318	-	ratA	b2619	toxic UPF0083 family protein inhibitor of 70S ribosome formation	180	462	1
2445530	2444781	-	yfcA	b2327	UPF0721 family inner membrane protein	16	41	1
2280662	2282362	+	yejH	b2184	putative ATP-dependent DNA or RNA helicase	9	23	1
932020	931115	-	trxB	b0888	thioredoxin reductase, FAD/NAD(P)-binding	168	429	1
3366688	3365732	-	insH1	b3218	IS5 transposase and trans-activator	31	79	1
1941605	1940343	-	mepM	b1856	murein DD-endopeptidase, space-maker hydrolase, septation protein	44	112	1
60316	59717	-	rluA	b0058	dual specificity 23S rRNA pseudouridine(746), tRNA pseudouridine(32) synthase, SAM-dependent	24	61	1
4161154	4161741	+	fabR	b3963	transcriptional repressor of fabA and fabB	72	182	1
3308894	3308070	-	nlpI	b3163	lipoprotein involved in osmotic sensitivity and filamentation	79	199	1
3971290	3972492	+	wecC	b3787	UDP-N-acetyl-D-mannosaminuronic acid dehydrogenase	29	73	1
1908955	1909134	+	yobH	b4536	uncharacterized protein	33	83	1
4366743	4365502	-	dcuA	b4138	C4-dicarboxylate antiporter	227	570	1
218745	217087	-	proS	b0194	prolyl-tRNA synthetase	184	462	1
3340035	3339286	-	mlaF	b3195	ABC transporter maintaining OM lipid asymmetry, ATP-binding protein	67	168	1
565948	564845	-	intD	b0537	DLP12 prophage; putative phage integrase	2	5	1
1053332	1052319	-	yccM	b0992	putative 4Fe-4S membrane protein	2	5	1
1125296	1124148	-	mdtH	b1065	multidrug resistance efflux transporter conferring overexpression resistance to norfloxacin and enoxacin	2	5	1
1817105	1816416	-	chbG	b1733	chito-oligosaccharide deacetylase	6	15	1
1834146	1834763	+	ydjY	b1751	putative ferrodoxin-like lipoprotein	2	5	1
1875703	1876824	+	yeaN	b1791	putative transporter	2	5	1
2242937	2241840	-	yeiB	b2152	DUF418 family putative inner membrane protein	4	10	1
2292380	2291388	-	ccmH	b2194	heme lyase, CcmH subunit	6	15	1
2298229	2297687	-	napC	b2202	quinol dehydrogenase, electron source for NapAB	4	10	1
2545579	2544782	-	murR	b2427	repressor for murPQ, MurNAc 6-P inducible	2	5	1
2585495	2583576	-	aegA	b2468	putative oxidoreductase, FeS binding subunit/NAD/FAD-binding subunit	2	5	1
2880357	2879818	-	casE	b2756	CRISPR RNA precursor cleavage enzyme; CRISP RNA (crRNA) containing Cascade antiviral complex protein	2	5	1
3219046	3217586	-	aer	b3072	fused signal transducer for aerotaxis sensory component/methyl accepting chemotaxis component	2	5	1
3361206	3361910	+	gltF	b3214	periplasmic protein	10	25	1
4370382	4369186	-	yjeH	b4141	putative transporter	4	10	1
4542067	4542603	+	fimE	b4313	tyrosine recombinase/inversion of on/off regulator of fimA	2	5	1
4591249	4589159	-	yjiY	b4354	putative transporter	2	5	1
246209	245991	-	yafQ	b0225	translation inhibitor toxin of toxin-antitoxin pair YafQ/DinJ	92	229	1
3430808	3430050	-	aroE	b3281	dehydroshikimate reductase, NAD(P)-binding	32	79	1
26307	27197	+	ispH	b0029	4-hydroxy-3-methylbut-2-enyl diphosphate reductase, 4Fe-4S protein	58	143	1
3969061	3970047	+	wzzE	b3785	Entobacterial Common Antigen (ECA) polysaccharide chain length modulation protein	39	96	1
3739735	3740928	+	avtA	b3572	valine-pyruvate aminotransferase 1	37	91	1
4399282	4400172	+	miaA	b4171	delta(2)-isopentenylpyrophosphate tRNA-adenosine transferase	61	150	1
2797241	2797480	+	ygaV	b2667	tributyltin-inducible repressor of ygaVP	11	27	1
4351632	4350061	-	dcuS	b4125	sensory histidine kinase in two-component regulatory system with DcuR, regulator of anaerobic fumarate respiration	11	27	1
1166115	1167359	+	ndh	b1109	respiratory NADH dehydrogenase 2/cupric reductase	476	1168	1
3439100	3438735	-	zntR	b3292	zntA gene transcriptional activator	73	179	1
275087	274131	-	insH1	b0259	IS5 transposase and trans-activator	31	76	1
3068778	3068203	-	argO	b2923	arginine transporter	173	422	1
2520642	2519287	-	gltX	b2400	glutamyl-tRNA synthetase	315	768	1
2423509	2422679	-	yfcI	b2305	transposase_31 family protein	16	39	1
4350004	4349345	-	dcuR	b4124	response regulator in two-component regulatory system with DcuS	48	117	1
3602056	3601058	-	ftsX	b3462	inner membrane putative ABC superfamily transporter permease	55	134	1
3342866	3343381	+	lptC	b3199	lipopolysaccharide export, IM-tethered periplasmic protein of the LptBFGC export complex	51	124	1
228786	228845	+	rrfH	b0205	5S ribosomal RNA of rrnH operon	3709	9013	1
1568793	1567534	-	yddW	b1491	liprotein, glycosyl hydrolase homolog	14	34	1
2010630	2011049	+	yedL	b1932	putative acyl transferase	7	17	1
2689476	2688823	-	yfhG	b2555	putative outer membrane protein modulating the QseEF response	14	34	1
2976355	2976334	-	omrB	b4445	-	70	170	1
4455815	4457128	+	mpl	b4233	UDP-N-acetylmuramate:L-alanyl-gamma-D-glutamyl-meso-diaminopimelate ligase	113	274	1
2405042	2404659	-	nuoA	b2288	NADH:ubiquinone oxidoreductase, membrane subunit A	464	1122	1
107735	108187	+	secM	b0097	regulator of secA translation	72	174	1
758736	761477	+	sucA	b0726	2-oxoglutarate decarboxylase, thiamine triphosphate-binding	159	382	1
850480	850935	+	ompX	b0814	outer membrane protein X	4095	9830	1
3256621	3255371	-	yhaM	b4470	putative L-serine dehydratase alpha chain	5	12	1
1619604	1619927	+	marA	b1531	multiple antibiotic resistance transcriptional regulator	110	263	1
51192	50410	-	apaH	b0049	diadenosine tetraphosphatase	59	141	1
1914786	1912798	-	prc	b1830	carboxy-terminal protease for penicillin-binding protein 3	59	141	1
2284159	2284326	+	yejL	b2187	UPF0352 family protein	136	325	1
3779857	3780987	+	lldD	b3605	L-lactate dehydrogenase, FMN-linked	36	86	1
1348882	1347008	-	rnb	b1286	ribonuclease II	50	119	1
1163290	1164054	+	thiK	b1106	thiamine kinase	8	19	1
882704	882006	-	deoR	b0840	deoxyribose-5-phosphate-inducible deoxyribose operon transcriptional repressor; repressor of nupG and tsx	30	71	1
938024	939307	+	rarA	b0892	DNA-dependent ATPase involved in processing recombination intermediates at replication forks	30	71	1
1910069	1909338	-	kdgR	b1827	KDG regulon transcriptional repressor	137	324	1
407458	408075	+	aroM	b0390	AroM family protein	11	26	1
2137932	2139455	+	yegH	b2063	inner membrane protein	22	52	1
2296290	2295613	-	ccmC	b2199	heme exporter subunit	11	26	1
1994676	1992904	-	uvrC	b1913	excinuclease UvrABC, endonuclease subunit	36	85	1
212361	213599	+	tilS	b0188	tRNA(Ile)-lysidine synthetase	14	33	1
4560960	4561454	+	kptA	b4331	RNA 2'-phosphotransferase	14	33	1
3959783	3959562	-	ppiC	b3775	peptidyl-prolyl cis-trans isomerase C (rotamase C)	122	287	1
3946730	3946789	+	rrfC	b3759	5S ribosomal RNA of rrnC operon	3772	8869	1
2356934	2357773	+	yfaD	b2244	transposase_31 family protein	20	47	1
3645415	3646197	+	rlmJ	b3499	23S rRNA m(6)A2030 methyltransferase, SAM-dependent	69	162	1
4171667	4171726	+	rrfB	b3971	5S ribosomal RNA of rrnB operon	3981	9339	1
246472	246272	-	dinJ	b0226	antitoxin of YafQ-DinJ toxin-antitoxin system	438	1027	1
1832458	1833204	+	xthA	b1749	exonuclease III	85	199	1
962025	963638	+	rpsA	b0911	30S ribosomal subunit protein S1	945	2212	1
201001	201966	+	lpxD	b0179	UDP-3-O-(3-hydroxymyristoyl)-glucosamine N-acyltransferase	146	341	1
75450	74527	-	thiB	b0068	thiamine-, thiamine pyrophosphate-, thiamine monophosphate-binding ABC transporter periplasmic protein; ThiBPQ thiamine, thiamine pyrophosphate importer	6	14	1
417172	417801	+	phoB	b0399	response regulator in two-component regulatory system with PhoR (or CreC)	6	14	1
1056148	1053464	-	torS	b0993	hybrid sensory histidine kinase in two-component regulatory system with TorR	3	7	1
2348544	2348738	+	yfaE	b2236	ferredoxin involved with ribonucleotide reductase diferric-tyrosyl radical (Y*) cofactor maintenance	6	14	1
2493224	2492034	-	frc	b2374	formyl-CoA transferase, NAD(P)-binding	3	7	1
2682893	2684026	+	yphH	b2550	putative DNA-binding transcriptional regulator	3	7	1
2715290	2714469	-	yfiE	b2577	putative DNA-binding transcriptional regulator	6	14	1
2892687	2893898	+	ygcN	b2766	putative oxidoreductase	6	14	1
2962734	2962471	-	ppdC	b2823	putative prepilin peptidase-dependent protein	3	7	1
3540193	3540360	+	feoA	b3408	ferrous iron transporter, protein A	6	14	1
3713682	3714062	+	yiaC	b3550	putative acyl-CoA transferase	3	7	1
4337001	4335724	-	adiC	b4115	arginine:agmatine antiporter	6	14	1
4602828	4602118	-	yjjP	b4364	DUF1212 family inner membrane protein	3	7	1
4213070	4213129	+	rrfE	b4010	5S ribosomal RNA of rrnE operon	3948	9202	1
4175502	4175526	+	tyrU	b3977	Tyr tRNA	6905	16019	1
164760	167234	+	mrcB	b0149	fused glycosyl transferase and transpeptidase	22	51	1
4347296	4345710	-	fumB	b4122	anaerobic class I fumarate hydratase (fumarase B)	16	37	1
3328993	3330366	+	dacB	b3182	D-alanyl-D-alanine carboxypeptidase	13	30	1
3761219	3759888	-	selA	b3591	selenocysteine synthase	26	60	1
1214029	1213358	-	bluR	b1162	repressor of blue light-responsive genes	36	83	1
440147	438345	-	dxs	b0420	1-deoxyxylulose-5-phosphate synthase, thiamine triphosphate-binding, FAD-requiring	59	136	1
1655838	1656119	+	ynfB	b1583	UPF0482 family putative periplasmic protein	246	567	1
721703	721086	-	kdpE	b0694	response regulator in two-component regulatory system with KdpD	20	46	1
3938257	3939189	+	rbsR	b3753	transcriptional repressor of ribose metabolism	10	23	1
4448722	4449012	+	chpB	b4225	toxin of the ChpB-ChpS toxin-antitoxin system	30	69	1
779097	779558	+	pal	b0741	peptidoglycan-associated outer membrane lipoprotein	1075	2468	1
3213077	3214858	+	rpoD	b3067	RNA polymerase, sigma 70 (sigma D) factor	238	546	1
2620842	2620276	-	upp	b2498	uracil phosphoribosyltransferase	236	541	1
3423757	3423698	-	rrfD	b3274	5S ribosomal RNA of rrnD operon	5456	12506	1
807251	806028	-	ybhC	b0772	acyl-CoA thioesterase, lipoprotein	49	112	1
3605009	3605218	+	yhhL	b3466	DUF1145 family protein	21	48	1
429535	430446	+	secF	b0409	SecYEG protein translocase auxillary subunit	88	201	1
4520294	4519368	-	yjhU	b4295	putative DNA-binding transcriptional regulator; KpLE2 phage-like element	53	121	1
2433896	2433042	-	accD	b2316	acetyl-CoA carboxylase, beta (carboxyltransferase) subunit	278	634	1
3328685	3328269	-	greA	b3181	transcript cleavage factor	179	408	1
4341598	4340750	-	melR	b4118	melibiose operon transcriptional regulator; autoregulator	18	41	1
2726158	2726099	-	rrfG	b2588	5S ribosomal RNA of rrnG operon	5336	12145	1
1288594	1287812	-	purU	b1232	formyltetrahydrofolate hydrolase	87	198	1
346307	345696	-	yahN	b0328	amino acid exporter for proline, lysine, glutamate, homoserine	11	25	1
1721294	1722091	+	ydhJ	b1644	putative membrane fusion protein (MFP) of YdhJK efflux pump	11	25	1
2350981	2349965	-	glpQ	b2239	periplasmic glycerophosphodiester phosphodiesterase	11	25	1
3389550	3390419	+	aaeR	b3243	transcriptional regulator for aaeXAB operon	11	25	1
1227744	1227977	+	ycgL	b1179	UPF0745 family protein	59	134	1
1021168	1021737	+	sxy	b0959	CRP-S-dependent promoter expression factor	15	34	1
1506202	1506678	+	ydcN	b1434	putative DNA-binding transcriptional regulator	15	34	1
2441794	2443740	+	mnmC	b2324	fused 5-methylaminomethyl-2-thiouridine-forming enzyme methyltransferase and FAD-dependent demodification enzyme	15	34	1
1289102	1288704	-	ychJ	b1233	UPF0225 family protein	85	192	1
3342303	3342809	+	kdsC	b3198	3-deoxy-D-manno-octulosonate 8-phosphate phosphatase	62	140	1
688983	688027	-	insH1	b0656	IS5 transposase and trans-activator	35	79	1
113474	114457	+	guaC	b0104	GMP reductase	52	117	1
318537	318361	-	rclB	b0303	reactive chlorine species (RCS) stress resistance periplasmic protein	4	9	1
396669	397829	+	sbmA	b0377	microcin B17 transporter	8	18	1
796584	797582	+	modC	b0765	molybdate transporter subunit	4	9	1
1194258	1193857	-	nudJ	b1134	bifunctional thiamine pyrimidine pyrophosphate hydrolase/ thiamine pyrophosphate hydrolase	44	99	1
2003576	2002140	-	fliC	b1923	flagellar filament structural protein (flagellin)	4	9	1
3898052	3898579	+	cbrC	b3717	UPF0167 family protein	4	9	1
3376746	3376309	-	sspB	b3228	ClpXP protease specificity enhancing factor	166	373	1
3405947	3407236	+	accC	b3256	acetyl-CoA carboxylase, biotin carboxylase subunit	114	256	1
2976159	2976132	-	omrA	b4444	-	78	175	1
1800608	1800126	-	infC	b1718	translation initiation factor IF-3	1028	2303	1
1813633	1813451	-	cedA	b1731	cell division modulator	21	47	1
2194330	2196303	+	metG	b2114	methionyl-tRNA synthetase	101	226	1
203378	204466	+	lpxB	b0182	tetraacyldisaccharide-1-P synthase	38	85	1
4434143	4434463	+	ytfH	b4212	DUF24 family HxlR-type putative transcriptional regulator	17	38	1
4085792	4082802	-	fdoG	b3894	formate dehydrogenase-O, large subunit	359	802	1
142809	143675	+	yadG	b0127	putative ABC superfamily transporter ATP-binding subunit	48	107	1
1925138	1925308	+	holE	b1842	DNA polymerase III, theta subunit	85	189	1
3648558	3648851	+	arsR	b3501	arsenical resistance operon transcriptional repressor; autorepressor	9	20	1
2339390	2336823	-	gyrA	b2231	DNA gyrase (type II topoisomerase), subunit A	203	451	1
954436	953639	-	focA	b0904	formate channel	64	142	1
975652	976296	+	mukE	b0923	chromosome condensin MukBEF, MukE localization factor	51	113	1
2167144	2167170	+	cyaR	b4438	-	251	556	1
4082729	4081887	-	fdoH	b3893	formate dehydrogenase-O, Fe-S subunit	216	478	1
409989	409138	-	rdgC	b0393	nucleoid-associated ssDNA and dsDNA binding protein; competitive inhibitor of RecA function	44	97	1
3817790	3818554	+	dinD	b3645	DNA damage-inducible protein	49	108	1
2944572	2944955	+	csdE	b2811	CsdA-binding activator; Fe-S protein	54	119	1
52400	51639	-	rsmA	b0051	16S rRNA m(6)A1518, m(6)A1519 dimethyltransferase, SAM-dependent	140	308	1
490782	490315	-	priC	b0467	primosomal replication protein N''	20	44	1
1271819	1270779	-	chaA	b1216	calcium/sodium:proton antiporter	20	44	1
3891645	3892760	+	mdtL	b3710	multidrug efflux system protein	5	11	1
4558259	4557408	-	hypT	b4327	hypochlorite-responsive transcription factor	5	11	1
2656706	2656566	-	iscX	b2524	Iron binding protein associated with IscS; putative molecular adaptor of IscS function	123	270	1
1287592	1287568	-	tyrT	b1231	Tyr tRNA	7434	16303	1
2224840	2223968	-	pbpG	b2134	D-alanyl-D-alanine endopeptidase	26	57	1
3821458	3822021	+	gmk	b3648	guanylate kinase	115	252	1
441313	441131	-	xseB	b0422	exonuclease VII small subunit	105	230	1
3293305	3292505	-	rsmI	b3146	16S rRNA C1402 2'-O-ribose methyltransferase, SAM-dependent	21	46	1
2344895	2347120	+	nrdA	b2234	ribonucleoside-diphosphate reductase 1, alpha subunit	32	70	1
3511392	3511090	-	yhfY	b3382	PRD domain protein	16	35	1
1168802	1168230	-	ycfQ	b1111	repressor for bhsA(ycfR)	38	83	1
3994029	3993769	-	cyaY	b3807	iron-dependent inhibitor of iron-sulfur cluster formation; frataxin; iron-binding and oxidizing protein	111	242	1
3828635	3827490	-	gltS	b3653	glutamate transporter	28	61	1
4199534	4200064	+	yjaG	b3999	DUF416 domain protein	92	200	1
2186990	2187268	+	rcnB	b2107	periplasmic modulator of Ni and Co efflux	166	359	1
2910655	2909924	-	mazG	b2781	nucleoside triphosphate pyrophosphohydrolase	31	67	1
1287298	1287274	-	tyrV	b1230	Tyr tRNA	7408	16010	1
2431654	2431052	-	dedD	b2314	membrane-anchored periplasmic protein involved in septation	25	54	1
3816706	3817509	+	yicC	b3644	UPF0701 family protein	141	304	1
1289275	1290120	+	rssA	b1234	putative patatin-like family phospholipase	85	183	1
3433720	3434169	+	def	b3287	peptide deformylase	345	742	1
2688773	2687499	-	glrR	b2554	response regulator regulating glmY sRNA in two-component system with sensor protein GlrK	20	43	1
3398845	3398417	-	mreD	b3249	cell wall structural complex MreBCD transmembrane component MreD	20	43	1
3606481	3608619	+	zntA	b3469	zinc, cobalt and lead efflux system	27	58	1
1307120	1306851	-	yciU	b1248	UPF0263 family protein	82	176	1
2233630	2233809	+	yeiS	b2145	DUF2542 family protein	22	47	1
480278	480120	-	hha	b0460	modulator of gene expression, with H-NS	239	510	1
1202903	1202289	-	cohE	b1145	e14 prophage; repressor protein phage e14	31	66	1
3578696	3577761	-	gntR	b3438	d-gluconate inducible gluconate regulon transcriptional repressor	62	132	1
1987728	1987537	-	yecJ	b4537	uncharacterized protein	31	66	1
3423512	3423453	-	rrfF	b3272	5S ribosomal RNA of rrnD operon	5558	11817	1
951050	950370	-	pflA	b0902	[formate-C-acetyltransferase 1]-activating enzyme; pyruvate formate-lyase 1-activating enzyme	199	422	1
219965	219621	-	rcsF	b0196	putative outer membrane protein	108	229	1
2240318	2239380	-	mglB	b2150	methyl-galactoside transporter subunit	95	201	1
1717192	1715978	-	tyrS	b1637	tyrosyl-tRNA synthetase	182	385	1
2634262	2635572	+	xseA	b2509	exonuclease VII, large subunit	35	74	1
703974	705860	+	nagE	b0679	fused N-acetyl glucosamine specific PTS enzyme: IIC, IIB, and IIA components	36	76	1
2514361	2515413	+	insL1	b2394	IS186 transposase	9	19	1
401416	401616	+	iraP	b0382	anti-RssB factor, RpoS stabilzer during Pi starvation; anti-adapter protein	94	198	1
2635784	2635629	-	yfgJ	b2510	DUF1407 family protein	134	282	1
214863	215225	+	arfB	b0191	alternative stalled-ribosome rescue factor B; peptidyl-tRNA hydrolase, ribosome-attached	10	21	1
4056309	4055320	-	glnL	b3869	sensory histidine kinase in two-component regulatory system with GlnG	10	21	1
3337226	3336993	-	mlaB	b3191	ABC transporter maintaining OM lipid asymmetry, cytoplasmic STAS component	71	149	1
2379229	2377619	-	menD	b2264	2-succinyl-5-enolpyruvyl-6-hydroxy-3-cyclohexene-1-carboxylate synthase; SEPHCHC synthase	21	44	1
3877435	3877097	-	yidB	b3698	DUF937 family protein	32	67	1
4050735	4050163	-	yihA	b3865	cell division GTP-binding protein	251	525	1
1795122	1794202	-	btuC	b1711	vitamin B12 transporter subunit: membrane component of ABC superfamily	11	23	1
4026557	4027198	+	fre	b3844	NAD(P)H-flavin reductase	171	357	1
3039713	3038877	-	xerD	b2894	site-specific tyrosine recombinase	24	50	1
3327634	3327065	-	rlmE	b3179	23S rRNA U2552 2'-O-ribose methyltransferase, SAM-dependent	108	224	1
3604423	3604959	+	rsmD	b3465	16S rRNA m(2)G966 methyltransferase, SAM-dependent	27	56	1
988955	987615	-	asnS	b0930	asparaginyl tRNA synthetase	224	464	1
1893205	1891355	-	yoaA	b1808	putative ATP-dependent helicase, DinG family	15	31	1
2817473	2816967	-	yqaB	b2690	fructose-1-P and 6-phosphogluconate phosphatase	63	130	1
1894701	1894582	-	yoaH	b1811	UPF0181 family protein	163	336	1
3514359	3513661	-	gph	b3385	phosphoglycolate phosphatase	73	150	1
2380613	2379378	-	menF	b2265	isochorismate synthase 2	38	78	1
4040547	4040606	+	rrfA	b3855	5S ribosomal RNA of rrnA operon	4396	9011	1
3409100	3409921	+	prmA	b3259	methyltransferase for 50S ribosomal subunit protein L11	41	84	1
25237	25671	+	lspA	b0027	prolipoprotein signal peptidase (signal peptidase II)	105	215	1
658977	659120	+	tatE	b0627	TatABCE protein translocation system subunit	408	833	1
1052097	1052210	+	gnsA	b4517	putative phosphatidylethanolamine synthesis regulator	51	104	1
2038793	2038182	-	yedW	b1969	response regulator family protein	27	55	1
1950492	1948780	-	aspS	b1866	aspartyl-tRNA synthetase	367	745	1
3933808	3935253	+	rbsA	b3749	fused D-ribose transporter subunits of ABC superfamily: ATP-binding components	38	77	1
4185380	4189543	+	rpoC	b3988	RNA polymerase, beta prime subunit	612	1240	1
2530146	2528191	-	ligA	b2411	DNA ligase, NAD(+)-dependent	40	81	1
2968404	2966218	-	ptsP	b2829	fused PTS enzyme: PEP-protein phosphotransferase (enzyme I)/GAF domain containing protein	53	107	1
1116552	1115692	-	lpxL	b1054	lauryl-acyl carrier protein (ACP)-dependent acyltransferase	66	133	1
3096711	3097244	+	rdgB	b2954	dITP/XTP pyrophosphatase	75	151	1
174852	173632	-	hemL	b0154	glutamate-1-semialdehyde aminotransferase (aminomutase)	153	308	1
1202054	1201806	-	ymfJ	b1144	e14 prophage; uncharacterized protein	78	157	1
91443	93149	+	ftsI	b0084	transpeptidase involved in septal peptidoglycan synthesis (penicillin-binding protein 3)	40	80	1
152782	152273	-	yadM	b0138	putative fimbrial-like adhesin protein	2	4	1
162001	161531	-	ligT	b0147	2'-5' RNA ligase	6	12	1
315617	316423	+	insF1	b0299	IS3 transposase B	5	10	1
361830	361279	-	lacA	b0342	thiogalactoside acetyltransferase	1	2	1
523291	527511	+	rhsD	b0497	Rhs family putative polymorphic toxin	1	2	1
567168	567974	+	insF1	b0541	IS3 transposase B	8	16	1
715442	715876	+	ybfP	b0689	lipoprotein	2	4	1
738122	738823	+	ybfD	b0706	H repeat-associated putative transposase	1	2	1
742526	741105	-	dtpD	b0709	dipeptide and tripeptide permease D	1	2	1
809227	807998	-	bioA	b0774	7,8-diaminopelargonic acid synthase, PLP-dependent	1	2	1
809374	810354	+	bioB	b0775	biotin synthase	1	2	1
817074	818003	+	moaA	b0781	molybdopterin biosynthesis protein A	4	8	1
890119	890436	+	ybjM	b0848	inner membrane protein	7	14	1
949538	948690	-	ycaN	b0900	LysR family putative transcriptional regulator	3	6	1
1050057	1050500	+	insB1	b0988	IS1 transposase B	2	4	1
1059286	1061772	+	torA	b0997	trimethylamine N-oxide (TMAO) reductase I, catalytic subunit	1	2	1
1153330	1154079	+	pabC	b1096	4-amino-4-deoxychorismate lyase component of para-aminobenzoate synthase multienzyme complex	29	58	1
1245190	1245570	+	ycgY	b1196	uncharacterized protein	1	2	1
1633652	1634182	+	pinQ	b1545	Qin prophage; putative site-specific recombinase	8	16	1
1643211	1642519	-	quuQ	b1559	Qin prophage; putative antitermination protein Q	1	2	1
1653885	1652926	-	rspB	b1580	putative Zn-dependent NAD(P)-binding oxidoreductase	3	6	1
1655111	1653957	-	rspA	b1581	bifunctional D-altronate/D-mannonate dehydratase	2	4	1
1663639	1664433	+	ynfH	b1590	oxidoreductase, membrane subunit	3	6	1
1729117	1733673	+	lhr	b1653	putative ATP-dependent helicase	5	10	1
1749529	1748777	-	ydhT	b1669	FNR, Nar, NarP-regulated protein; putative subunit of YdhYVWXUT oxidoreductase complex	1	2	1
1777226	1778317	+	ydiO	b1695	putative acyl-CoA dehydrogenase	1	2	1
1834838	1835485	+	ydjZ	b1752	TVP38/TMEM64 family inner membrane protein	1	2	1
1837242	1838717	+	ynjC	b1755	inner membrane putative ABC superfamily transporter permease	1	2	1
2033454	2033149	-	yedR	b1963	inner membrane protein	3	6	1
2074809	2076281	+	yeeR	b2001	CP4-44 prophage; putative membrane protein	1	2	1
2161494	2162849	+	mdtD	b2077	putative arabinose efflux transporter	1	2	1
2170562	2171368	+	insF1	b2089	IS3 transposase B	6	12	1
2178851	2180068	+	yegT	b2098	nucleoside transporter, low affinity	1	2	1
2211255	2211656	+	yehR	b2123	lipoprotein, DUF1307 family	1	2	1
2296994	2296392	-	ccmB	b2200	heme exporter subunit	5	10	1
2300230	2299595	-	napG	b2205	ferredoxin-type protein essential for electron transfer from ubiquinol to periplasmic nitrate reductase (NapAB)	2	4	1
2302723	2300297	-	napA	b2206	nitrate reductase, periplasmic, large subunit	8	16	1
2308585	2307002	-	yojI	b2211	microcin J25 efflux pump, TolC-dependent; fused ABC transporter permease and ATP-binding components	1	2	1
2365958	2367037	+	arnB	b2253	uridine 5'-(beta-1-threo-pentapyranosyl-4-ulose diphosphate) aminotransferase, PLP-dependent	3	6	1
2464977	2464282	-	mlaA	b2346	ABC transporter maintaining OM lipid asymmetry, OM lipoprotein component	142	284	1
2630356	2630835	+	yfgI	b2506	nalidixic acid resistance protein, putative periplasmic protein	1	2	1
2674658	2673846	-	yphB	b2544	mutarotase superfamily protein, YphB family	2	4	1
2691068	2689701	-	glrK	b2556	sensor protein kinase regulating glmY sRNA in two-component system with response regulator GlrR	3	6	1
2782696	2778176	-	ypjA	b2647	adhesin-like autotransporter	1	2	1
2832259	2830805	-	norR	b2709	anaerobic nitric oxide reductase DNA-binding transcriptional activator	2	4	1
2863623	2864201	+	ygbL	b2738	putative class II aldolase	1	2	1
2964147	2963737	-	ppdA	b2826	putative prepilin peptidase-dependent protein	4	8	1
3038076	3036403	-	recJ	b2892	ssDNA exonuclease, 5' --> 3'-specific	24	48	1
3067143	3066307	-	ygfI	b2921	putative DNA-binding transcriptional regulator	3	6	1
3105744	3106940	+	nupG	b2964	nucleoside transporter	10	20	1
3177250	3176888	-	yqiB	b3033	DUF1249 protein YqiB	24	48	1
3177880	3177311	-	nudF	b3034	ADP-ribose pyrophosphatase	29	58	1
3185444	3185935	+	ygiL	b3043	putative fimbrial-like adhesin protein	1	2	1
3225752	3226141	+	ebgC	b3077	evolved beta-D-galactosidase, beta subunit; cupin superfamily	1	2	1
3278635	3277886	-	agaR	b3131	transcriptional repressor of the aga regulon	37	74	1
3583707	3584150	+	insB1	b3445	IS1 transposase B	2	4	1
3710445	3708814	-	eptB	b3546	KDO phosphoethanolamine transferase, Ca(2+)-inducible	15	30	1
3747114	3748550	+	lyxK	b3580	L-xylulose kinase	1	2	1
3751838	3751158	-	yiaT	b3584	putative outer membrane protein	2	4	1
4017363	4018730	+	rmuC	b3832	DNA recombination protein	16	32	1
4033175	4034566	+	trkH	b3849	potassium transporter	11	22	1
4142560	4143579	+	frwC	b3949	putative enzyme IIC component of PTS	1	2	1
4200596	4201231	+	yjaH	b4001	DUF1481 family putative lipoprotein	11	22	1
4327165	4329333	+	crfC	b4109	clamp-binding sister replication fork colocalization protein, dynamin-related	1	2	1
4427392	4426658	-	yjfZ	b4204	uncharacterized protein	1	2	1
4462630	4460552	-	nrdD	b4238	anaerobic ribonucleoside-triphosphate reductase	89	178	1
4487348	4488370	+	lptG	b4262	lipopolysaccharide export ABC permease of the LptBFGC export complex	33	66	1
4537564	4536644	-	nanS	b4309	9-O-acetyl N-acetylneuraminic acid esterase	1	2	1
4559970	4559569	-	yjiG	b4329	SpmB family inner membrane protein	4	8	1
3577031	3575751	-	gntU	b4476	gluconate transporter, low affinity GNT 1 system	1	2	1
4001026	4000322	-	yigE	b4482	DUF2233 family protein	1	2	1
1734071	1733784	-	grxD	b1654	glutaredoxin-4	1010	2014	1
3822136	3822351	+	rpoZ	b3649	RNA polymerase, omega subunit	880	1754	1
2735981	2735061	-	rluD	b2594	23S rRNA pseudouridine(1911,1915,1917) synthase	126	251	1
3907548	3906883	-	phoU	b3724	negative regulator of PhoR/PhoB two-component regulator	70	139	1
3553115	3555760	+	malT	b3418	mal regulon transcriptional activator	59	117	1
3836252	3836286	+	selC	b3658	Sec tRNA	1584	3141	1
3384733	3385143	+	argR	b3237	l-arginine-responsive arginine metabolism regulon transcriptional regulator	116	230	1
3964199	3962775	-	gpp	b3779	guanosine pentaphosphatase/exopolyphosphatase	38	75	1
2718498	2717521	-	yfiF	b2581	putative methyltransferase	109	215	1
3347996	3348208	+	npr	b3206	phosphohistidinoprotein-hexose phosphotransferase component of N-regulated PTS system (Npr)	66	130	1
2868723	2867644	-	nlpD	b2742	activator of AmiC murein hydrolase activity, lipoprotein	81	159	1
1057924	1057292	-	torR	b0995	response regulator in two-component regulatory system with TorS	25	49	1
1150700	1151374	+	fabG	b1093	3-oxoacyl-[acyl-carrier-protein] reductase	816	1598	1
3333740	3334651	+	ispB	b3187	octaprenyl diphosphate synthase	90	176	1
665160	664132	-	rlpA	b0633	septal ring protein, suppressor of prc, minor lipoprotein	44	86	1
3431385	3430873	-	tsaC	b3282	tRNA(ANN) t(6)A37 threonylcarbamoyladenosine modification protein, threonine-dependent ADP-forming ATPase	81	158	1
3842372	3841980	-	yicN	b3663	DUF1198 family protein	19	37	1
3478467	3477937	-	slyD	b3349	FKBP-type peptidyl prolyl cis-trans isomerase (rotamase)	1717	3336	1
214321	214806	+	yaeQ	b0190	PDDEXK superfamily protein	69	134	1
3973638	3974459	+	rffH	b3789	glucose-1-phosphate thymidylyltransferase	17	33	1
1851917	1852498	+	pncA	b1768	nicotinamidase/pyrazinamidase	33	64	1
2448636	2449127	+	smrB	b2331	putative DNA endonuclease	82	159	1
816617	815769	-	ybhK	b0780	putative NAD(P)-binding transferase	15	29	1
3975176	3976246	+	wecE	b3791	TDP-4-oxo-6-deoxy-D-glucose transaminase	45	87	1
1509538	1509894	+	hicB	b1438	antitoxin for the HicAB toxin-antitoxin system	43	83	1
3604213	3602780	-	ftsY	b3464	Signal Recognition Particle (SRP) receptor	110	212	1
514023	514370	+	cueR	b0487	copper-responsive regulon transcriptional regulator	105	202	1
4196933	4197646	+	nudC	b3996	NADH pyrophosphatase	26	50	1
1369423	1369584	+	pspD	b1307	peripheral inner membrane phage-shock protein	25	48	1
3039885	3040346	+	fldB	b2895	flavodoxin 2	87	167	1
1176649	1177290	+	lolD	b1117	outer membrane-specific lipoprotein transporter subunit	82	157	1
2641774	2640716	-	ispG	b2515	1-hydroxy-2-methyl-2-(E)-butenyl 4-diphosphate synthase	242	463	1
2818615	2818583	-	serV	b2695	Ser tRNA	39414	75300	1
1339130	1338600	-	ribA	b1277	GTP cyclohydrolase II	153	292	1
433485	434528	+	ribD	b0414	fused diaminohydroxyphosphoribosylaminopyrimidine deaminase and 5-amino-6-(5-phosphoribosylamino) uracil reductase	120	229	1
435664	436581	+	thiL	b0417	thiamine monophosphate kinase	32	61	1
2404583	2403981	-	nuoB	b2287	NADH:ubiquinone oxidoreductase, chain B	512	975	1
4397442	4399229	+	mutL	b4170	methyl-directed mismatch repair protein	31	59	1
1095111	1094305	-	insF1	b1026	IS3 transposase B	10	19	1
3588083	3587400	-	ugpQ	b3449	glycerophosphodiester phosphodiesterase, cytosolic	29	55	1
925941	925914	-	serW	b0883	Ser tRNA	8196	15537	1
4496435	4496459	+	leuX	b4270	Leu tRNA	12348	23398	1
178432	177692	-	btuF	b0158	vitamin B12 transporter subunit: periplasmic-binding component of ABC superfamily	9	17	1
1996802	1996140	-	sdiA	b1916	quorum-sensing transcriptional activator	9	17	1
2545803	2546639	+	murQ	b2428	N-acetylmuramic acid 6-phosphate (MurNAc-6-P) etherase	27	51	1
3056013	3056135	+	ssrS	b2911	-	3727	7019	1
367480	366458	-	lacI	b0345	lactose-inducible lac operon transcriptional repressor	17	32	1
3398348	3397815	-	yhdE	b3248	Maf-like protein	49	92	1
4277353	4277090	-	soxS	b4062	superoxide response regulon transcriptional activator; autoregulator	97	182	1
358660	357821	-	cynR	b0338	transcriptional activator of cyn operon; autorepressor	8	15	1
2595829	2593874	-	tmcA	b2474	elongator methionine tRNA (ac4C34) acetyltransferase	8	15	1
3239974	3241158	+	sstT	b3089	sodium:serine/threonine symporter	8	15	1
3598014	3598337	+	panM	b3459	PanD autocleavage accelerator, panothenate synthesis	48	90	1
4115549	4114599	-	glpX	b3925	fructose 1,6-bisphosphatase II	16	30	1
202590	203318	+	lpxA	b0181	UDP-N-acetylglucosamine acetyltransferase	269	504	1
527611	527919	+	ybbC	b0498	putative immunity protein	15	28	1
3937324	3938193	+	rbsK	b3752	ribokinase	73	136	1
1846930	1845029	-	topB	b1763	DNA topoisomerase III	29	54	1
2434711	2434112	-	dedA	b2317	DedA family inner membrane protein	64	119	1
685899	685285	-	gltK	b0653	glutamate, aspartate ABC transporter permease subunit	7	13	1
1629245	1629388	+	ydfZ	b1541	selenoprotein, function unknown	7	13	1
2597588	2596935	-	purC	b2476	phosphoribosylaminoimidazole-succinocarboxamide synthetase	98	182	1
2795704	2796306	+	csiR	b2664	transcriptional repressor of csiD	7	13	1
2822609	2822169	-	recX	b2698	regulatory protein for RecA	7	13	1
2851031	2851843	+	hypB	b2727	GTP hydrolase involved in nickel liganding into hydrogenases	7	13	1
3340305	3341222	+	yrbG	b3196	putative calcium/sodium:proton antiporter	14	26	1
3326905	3325031	-	ftsH	b3178	protease, ATP-dependent zinc-metallo	139	258	1
3526119	3525619	-	nudE	b3397	adenosine nucleotide hydrolase; substrates include Ap3A, Ap2A, ADP-ribose, NADH	95	176	1
3343974	3344639	+	lptB	b3201	lipopolysaccharide export ABC transporter ATP-binding protein of the LptBFGC export complex	175	324	1
189476	188742	-	map	b0168	methionine aminopeptidase	249	461	1
3196723	3195350	-	hldE	b3052	fused heptose 7-phosphate kinase/heptose 1-phosphate adenyltransferase	76	140	1
853213	853620	+	mntR	b0817	Mn(2+)-responsive manganese regulon transcriptional regulator	81	149	1
2735004	2734333	-	yfiH	b2593	UPF0124 family protein	43	79	1
1805195	1805242	+	yniD	b4535	uncharacterized protein	43	79	1
2965125	2964391	-	thyA	b2827	thymidylate synthetase	73	134	1
3913638	3911869	-	glmS	b3729	L-glutamine:D-fructose-6-phosphate aminotransferase	334	613	1
724384	721760	-	kdpD	b0695	fused sensory histidine kinase in two-component regulatory system with KdpE: signal sensing protein	6	11	1
885200	884976	-	ybjH	b0843	uncharacterized protein	6	11	1
1443081	1445660	+	ydbH	b1381	putative membrane-anchored protein, function unknown	6	11	1
1875546	1874785	-	yeaM	b1790	putative DNA-binding transcriptional regulator	6	11	1
2546703	2548067	+	murP	b2429	N-acetylmuramic acid permease, EIIBC component, PTS system	6	11	1
2765123	2763567	-	yfjL	b2628	CP4-57 putative defective prophage, DUF4297/DUF1837 polymorphic toxin family protein	6	11	1
3490150	3488990	-	argD	b3359	bifunctional acetylornithine aminotransferase/ succinyldiaminopimelate aminotransferase	6	11	1
4540987	4541529	+	fimB	b4312	tyrosine recombinase/inversion of on/off regulator of fimA	35	64	1
3035144	3033687	-	lysS	b2890	lysine tRNA synthetase, constitutive	271	495	1
4464679	4463084	-	treC	b4239	trehalose-6-P hydrolase	576	1051	1
2551696	2551307	-	yfeZ	b2433	inner membrane protein	11	20	1
1219013	1219171	+	ymgF	b4520	inner membrane division septum protein	11	20	1
4297095	4296466	-	yjcO	b4078	Sel1 family TPR-like repeat protein	38	69	1
3926973	3926575	-	asnC	b3743	transcriptional activator of asnA; autorepressor	27	49	1
2403815	2402085	-	nuoC	b2286	NADH:ubiquinone oxidoreductase, fused CD subunit	311	564	1
4365012	4363375	-	dsbD	b4136	fused thiol:disulfide interchange protein: activator of DsbC/conserved protein	16	29	1
1798912	1797989	-	pheS	b1714	phenylalanine tRNA synthetase, alpha subunit	149	269	1
4081830	4081255	-	fdoI	b3892	formate dehydrogenase-O, cytochrome b556 subunit	166	299	1
3086736	3087830	+	metK	b2942	S-adenosylmethionine synthetase	882	1588	1
392575	391769	-	insF1	b0372	IS3 transposase B	10	18	1
1973309	1972866	-	cheW	b1887	purine-binding chemotaxis protein	5	9	1
2029569	2030429	+	yedA	b1959	amino acid exporter for phenylalanine, threonine	5	9	1
2309311	2308721	-	alkB	b2212	oxidative demethylase of N1-methyladenine or N3-methylcytosine DNA lesions	10	18	1
3497858	3499171	+	cysG	b3368	fused siroheme synthase 1,3-dimethyluroporphyriongen III dehydrogenase and siroheme ferrochelatase/uroporphyrinogen methyltransferase	15	27	1
4081198	4080329	-	fdhE	b3891	formate dehydrogenase formation protein	150	270	1
1097622	1097595	-	serX	b1032	Ser tRNA	8434	15155	1
976356	980756	+	mukB	b0924	chromosome condensin MukBEF, ATPase and DNA-binding subunit	59	106	1
2712926	2714200	+	srmB	b2576	ATP-dependent RNA helicase	98	176	1
4391479	4390487	-	rsgA	b4161	ribosome small subunit-dependent GTPase A	83	149	1
3055414	3054896	-	ygfB	b2909	UPF0149 family protein	390	700	1
4259973	4259518	-	zur	b4046	transcriptional repressor, Zn(II)-binding	141	253	1
3880089	3877735	-	gyrB	b3699	DNA gyrase, subunit B	227	407	1
4484250	4483867	-	holC	b4259	DNA polymerase III, chi subunit	57	102	1
4630492	4628885	-	yjjK	b4391	putative transporter subunit of ABC superfamily: ATP-binding component	189	338	1
761552	762709	+	sucB	b0727	dihydrolipoyltranssuccinase	482	857	1
3093530	3093886	+	yqgF	b2949	putative Holliday junction resolvase	27	48	1
4060477	4061127	+	yihL	b3872	putative DNA-binding transcriptional regulator	9	16	1
514829	514431	-	ybbJ	b0488	inner membrane protein that stimulates the ftsH htpX mutant suppressor activity of QmcA	31	55	1
4586979	4587833	+	mrr	b4351	methylated adenine and cytosine restriction protein	44	78	1
4376905	4377162	+	sugE	b4148	multidrug efflux system protein	48	85	1
3725288	3724437	-	glyQ	b3560	glycine tRNA synthetase, alpha subunit	235	416	1
2295350	2294931	-	ccmE	b2197	periplasmic heme chaperone	13	23	1
4124426	4123461	-	cytR	b3934	Anti-activator for CytR-CRP nucleoside utilization regulon	21	37	1
4400702	4401922	+	hflX	b4173	GTPase, stimulated by 50S subunit binding	144	253	1
4020008	4020199	+	esrE	b4707	-	133	233	1
77269	75674	-	sgrR	b0069	transcriptional DNA-binding transcriptional activator of sgrS sRNA	12	21	1
818600	819025	+	moaC	b0783	molybdopterin biosynthesis, protein C	24	42	1
1357080	1355497	-	sapA	b1294	antimicrobial peptide transport ABC transporter periplasmic binding protein	24	42	1
1673943	1674917	+	tqsA	b1601	pheromone AI-2 transporter	4	7	1
1835545	1836033	+	ynjA	b1753	carboxymuconolactone decarboxylase family protein	8	14	1
2679337	2678414	-	yphF	b2548	putative ABC superfamily sugar transporter periplasmic-binding protein	4	7	1
2839234	2838284	-	ascG	b2714	asc operon transcriptional repressor; prpBC operon repressor	20	35	1
4051066	4051250	+	csrC	b4457	-	128	224	1
3556819	3555863	-	rtcA	b4475	RNA 3'-terminal phosphate cyclase	4	7	1
3991183	3993669	+	cyaA	b3806	adenylate cyclase	63	110	1
1492099	1491992	-	mokB	b1420	regulatory peptide	43	75	1
197958	200330	+	bamA	b0177	BamABCDE complex OM biogenesis outer membrane pore-forming assembly factor	256	446	1
2263465	2262395	-	fruB	b2169	fused fructose-specific PTS enzymes: IIA component/HPr component	27	47	1
3561793	3561527	-	glpE	b3425	thiosulfate:cyanide sulfurtransferase (rhodanese)	46	80	1
3696488	3697999	+	bcsE	b3536	cellulose production protein	19	33	1
2640545	2639331	-	hisS	b2514	histidyl tRNA synthetase	246	427	1
397902	398936	+	yaiW	b0378	putative lipoprotein	15	26	1
9336	9863	+	mog	b0009	molybdochelatase incorporating molybdenum into molybdopterin	217	376	1
3935318	3936223	+	rbsC	b3750	D-ribose transporter subunit	56	97	1
1257782	1256751	-	ychF	b1203	catalase inhibitor protein; ATPase, K+-dependent, ribosome-associated	177	306	1
485589	484456	-	acrA	b0463	multidrug efflux system	95	164	1
813556	815517	+	uvrB	b0779	excinulease of nucleotide excision repair, DNA damage recognition component	69	119	1
2436619	2435666	-	usg	b2319	putative semialdehyde dehydrogenase	87	150	1
143732	144442	+	yadH	b0128	inner membrane putative ABC superfamily transporter permease	36	62	1
685225	684560	-	gltL	b0652	glutamate, aspartate ABC transporter ATP-binding subunit	25	43	1
1226050	1225415	-	minC	b1176	cell division inhibitor	75	129	1
4449622	4449152	-	ppa	b4226	inorganic pyrophosphatase	1635	2812	1
497205	497789	+	adk	b0474	adenylate kinase	450	772	1
2292934	2292437	-	dsbE	b2195	periplasmic thioredoxin of cytochrome c-type biogenesis	7	12	1
2887189	2884583	-	ygcB	b2761	R-loop helicase-annealase Cas3 needed for Cascade anti-viral activity	7	12	1
1031682	1031655	-	serT	b0971	Ser tRNA	13890	23792	1
4409305	4409976	+	rlmB	b4180	23S rRNA mG2251 2'-O-ribose methyltransferase, SAM-dependent	76	130	1
1896962	1898266	+	sdaA	b1814	L-serine dehydratase 1	138	236	1
4312961	4312131	-	alsR	b4089	d-allose-inducible als operon transcriptional repressor; autorepressor; repressor of rpiR	24	41	1
4471417	4471016	-	pyrI	b4244	aspartate carbamoyltransferase, regulatory subunit	51	87	1
3915170	3913860	-	glmU	b3730	fused N-acetyl glucosamine-1-phosphate uridyltransferase/glucosamine-1-phosphate acetyl transferase	220	375	1
4486248	4487288	+	lptF	b4261	lipopolysaccharide export ABC permease of the LptBFGC export complex	44	75	1
1121457	1121272	-	dinI	b1061	DNA damage-inducible protein I	83	141	1
4624759	4624175	-	ytjB	b4387	SMP_2 family putative membrane-anchored periplasmic protein	13	22	1
4447924	4448205	+	ytfP	b4222	GGCT-like protein	81	137	1
700296	699604	-	umpH	b0675	UMP phosphatase	116	196	1
1110893	1113376	+	opgH	b1049	membrane glycosyltransferase; nutrient-dependent cell size regulator, FtsZ assembly antagonist	77	130	1
774339	774572	+	ybgE	b0735	putative inner membrane protein in cydABX-ybgE operon	127	214	1
2913621	2911447	-	relA	b2784	(p)ppGpp synthetase I/GTP pyrophosphokinase	63	106	1
2114297	2113464	-	wcaN	b2042	putative regulatory subunit for GalU	242	407	1
4368297	4366921	-	aspA	b4139	aspartate ammonia-lyase	1216	2040	1
556843	556691	-	ybcJ	b0528	ribosome-associated protein; putative RNA-binding protein	130	218	1
3167688	3166141	-	ygiS	b3020	putative inner membrane ABC superfamily transporter permease	49	82	1
2743655	2744077	+	yfiB	b2605	OM lipoprotein putative positive effector of YfiN activity	67	112	1
72897	72259	-	thiQ	b0066	thiamine, thiamine pyrophosphate ABC transporter ATPase; ThiBPQ thiamine, thiamine pyrophosphate importer	3	5	1
686639	685959	-	gltJ	b0654	glutamate, aspartate ABC transporter permease subunit	12	20	1
1506050	1504935	-	ydcO	b1433	BenE family inner membrane putative transporter	6	10	1
1621107	1620268	-	eamA	b1533	cysteine and O-acetyl-L-serine efflux system	12	20	1
2920716	2919436	-	gudX	b2788	glucarate dehydratase-related protein, substrate unknown	3	5	1
3005756	3004038	-	ygeV	b2869	putative sigma-54-interacting transcriptional activator	30	50	1
3014209	3012644	-	yqeB	b2875	XdhC-CoxI family protein with NAD(P)-binding Rossman fold	45	75	1
3221496	3222419	+	ebgR	b3075	transcriptional repressor	12	20	1
3544814	3544104	-	bioH	b3412	pimeloyl-ACP methyl ester carboxylesterase	30	50	1
3794959	3795945	+	waaF	b3620	ADP-heptose:LPS heptosyltransferase II	45	75	1
4129865	4132237	+	metL	b3940	Bifunctional aspartokinase/homoserine dehydrogenase 2	42	70	1
4378914	4377841	-	ampC	b4150	penicillin-binding protein; beta-lactamase, intrinsically weak	9	15	1
755590	755877	+	sdhD	b0722	succinate dehydrogenase, membrane subunit, binds cytochrome b556	833	1382	1
3184870	3185100	+	yqiC	b3042	BMFP family putative fusogenic protein	403	665	1
252331	252669	+	yafO	b0233	mRNA interferase toxin of the YafO-YafN toxin-antitoxin system	20	33	1
2064437	2063418	-	cobT	b1991	nicotinate-nucleotide--dimethylbenzimidazole phosphoribosyltransferase	17	28	1
4021975	4022184	+	tatA	b3836	TatABCE protein translocation system subunit	765	1259	1
3434244	3435131	+	fmt	b3288	10-formyltetrahydrofolate:L-methionyl-tRNA(fMet) N-formyltransferase	180	296	1
2182751	2182065	-	yegW	b2101	putative DNA-binding transcriptional regulator	28	46	1
4230112	4229483	-	pepE	b4021	(alpha)-aspartyl dipeptidase	58	95	1
2810800	2811270	+	mprA	b2684	transcriptional repressor of microcin B17 synthesis and multidrug efflux	209	342	1
933254	937183	+	ftsK	b0890	DNA translocase at septal ring sorting daughter chromsomes	52	85	1
1445717	1445842	+	ynbE	b1382	lipoprotein	41	67	1
2999861	2999166	-	ygeR	b2865	LysM domain-containing M23 family putative peptidase; septation lipoprotein	30	49	1
4020256	4021836	+	ubiB	b3835	regulator of octaprenylphenol hydroxylation, ubiquinone synthesis; regulator of 2'-N-acetyltransferase; putative ABC1 family protein kinase	46	75	1
1862399	1862046	-	msrB	b1778	methionine sulfoxide reductase B	330	538	1
2142185	2141664	-	dcd	b2065	2'-deoxycytidine 5'-triphosphate deaminase	235	383	1
244357	245064	+	yafJ	b0223	putative amidotransfease	27	44	1
1125592	1126116	+	rimJ	b1066	ribosomal-protein-S5-alanine N-acetyltransferase	40	65	1
3995613	3996260	+	yigA	b3810	DUF484 family protein	56	91	1
405794	406192	+	yaiI	b0387	UPF0178 family protein	111	180	1
2765948	2766961	+	rnlA	b2630	CP4-57 prophage; RNase LS	113	183	1
4564659	4563952	-	yjiL	b4334	putative ATPase, activator of (R)-hydroxyglutaryl-CoA dehydratase	21	34	1
3513608	3512664	-	trpS	b3384	tryptophanyl-tRNA synthetase	225	364	1
2698520	2697945	-	pgpC	b2560	phosphatidylglycerophosphatase C, membrane bound	78	126	1
2985562	2984441	-	yqeF	b2844	short chain acyltransferase	39	63	1
3481131	3480637	-	kefG	b3351	potassium-efflux system ancillary protein for KefB, glutathione-regulated	13	21	1
3272721	3271897	-	garR	b3125	tartronate semialdehyde reductase	158	255	1
1329362	1330351	+	sohB	b1272	inner membrane protein, S49 peptidase family protein	95	153	1
4019654	4020199	+	ubiJ	b3834	aerobic ubiquinone synthesis protein, SCP2 family protein	118	190	1
2911061	2910786	-	mazF	b2782	mRNA interferase toxin, antitoxin is MazE	41	66	1
1769104	1770156	+	ydiK	b1688	UPF0118 family inner membrane protein	38	61	1
4375729	4376235	+	efp	b4147	polyproline-specific translation elongation factor EF-P	776	1243	1
250928	251923	+	dinB	b0231	DNA polymerase IV	10	16	1
1669562	1668729	-	ynfL	b1595	LysR family putative transcriptional regulator	5	8	1
2143296	2146553	+	yegE	b2067	putative diguanylate cyclase	5	8	1
2882607	2882185	-	casB	b2759	CRISP RNA (crRNA) containing Cascade antiviral complex protein	5	8	1
3725917	3726852	+	wecH	b3561	O-acetyltransferase for enterobacterial common antigen (ECA)	5	8	1
3759831	3758047	-	selB	b3590	selenocysteinyl-tRNA-specific translation factor	50	80	1
3874444	3873626	-	dgoK	b3693	2-oxo-3-deoxygalactonate kinase	5	8	1
4253046	4253858	+	ubiA	b4040	p-hydroxybenzoate octaprenyltransferase	110	176	1
4433026	4432121	-	ytfF	b4210	DMT transporter family inner membrane protein	5	8	1
1770402	1770447	+	rprA	b4431	-	15	24	1
3433530	3432466	-	smf	b4473	DNA recombination-mediator A family protein	5	8	1
1664536	1665090	+	dmsD	b1591	twin-argninine leader-binding protein for DmsA and TorA	62	99	1
1720794	1720420	-	slyA	b1642	global transcriptional regulator	225	359	1
1189746	1188346	-	phoQ	b1129	sensory histidine kinase in two-component regulatory system with PhoP	22	35	1
1668534	1667374	-	mlc	b1594	glucosamine anaerobic growth regulon transcriptional repressor; autorepressor	17	27	1
1120925	1120731	-	bssS	b1060	biofilm regulator	75	119	1
2747765	2746464	-	ffh	b2610	Signal Recognition Particle (SRP) component with 4.5S RNA (ffs)	229	363	1
1930717	1930487	-	yebG	b1848	DNA damage-inducible protein regulated by LexA	265	420	1
1907561	1907478	-	yobF	b1824	DUF2527 family heat-induced protein	171	271	1
1959816	1959310	-	yecM	b1875	putative metal-binding enzyme	24	38	1
3696155	3696027	-	yhjR	b3535	DUF2629 family protein	12	19	1
1099670	1100164	+	ycdY	b1035	redox enzyme maturation protein (REMP) chaperone for YcdX	182	288	1
4483807	4481012	-	valS	b4258	valyl-tRNA synthetase	157	248	1
3529378	3529719	+	hslR	b3400	ribosome-associated heat shock protein Hsp15	19	30	1
1148789	1149682	+	fabH	b1091	3-oxoacyl-[acyl-carrier-protein] synthase III	261	411	1
663933	662782	-	dacA	b0632	D-alanyl-D-alanine carboxypeptidase (penicillin-binding protein 5)	89	140	1
1226630	1226938	+	ycgJ	b1177	uncharacterized protein	42	66	1
1819775	1819485	-	chbA	b1736	N,N'-diacetylchitobiose-specific enzyme IIA component of PTS	7	11	1
2377562	2376864	-	menH	b2263	2-succinyl-6-hydroxy-2,4-cyclohexadiene-1-carboxylate synthase	7	11	1
2501160	2501957	+	ypdC	b2382	putative DNA-binding protein	7	11	1
2654903	2654187	-	sseB	b2522	rhodanase-like enzyme, sulfur transfer from thiosulfate	42	66	1
3254349	3254990	+	yhaK	b3106	redox-sensitive bicupin	7	11	1
3838278	3839141	+	yicL	b3660	EamA family inner membrane putative transporter	21	33	1
755937	757643	+	sdhA	b0723	succinate dehydrogenase, flavoprotein subunit	772	1210	1
1292892	1292539	-	hns	b1237	global DNA-binding transcriptional dual regulator H-NS	6174	9674	1
431983	431159	-	tsx	b0411	nucleoside channel, receptor of phage T6 and colicin K	172	269	1
3168514	3168278	-	mqsR	b3022	GCU-specific mRNA interferase toxin of the MqsR-MqsA toxin-antitoxin system; biofilm/motility regulator; anti-repressor	16	25	1
3775602	3776129	+	mtlR	b3601	mannitol operon repressor	16	25	1
4118545	4118730	+	zapB	b3928	FtsZ stabilizer; septal ring assembly factor, stimulates cell division	2610	4072	1
2526976	2527914	+	yfeH	b2410	putative inorganic ion transporter	34	53	1
2080561	2079563	-	yeeA	b2008	putative transporter, FUSC family inner membrane protein	9	14	1
444485	443634	-	panE	b0425	2-dehydropantoate reductase, NADPH-specific	76	118	1
757719	758375	+	sdhB	b0724	succinate dehydrogenase, FeS subunit	518	804	1
4252536	4252973	+	ubiC	b4039	chorismate--pyruvate lyase	58	90	1
4175974	4177098	+	tufB	b3980	translation elongation factor EF-Tu 2	8159	12641	1
706123	707727	+	glnS	b0680	glutamyl-tRNA synthetase	250	387	1
2823739	2822738	-	recA	b2699	DNA recombination and repair protein; ssDNA-dependent ATPase; synaptase; ssDNA and dsDNA binding protein forming filaments; ATP-dependent homologous DNA strand exchanger; recombinase A; LexA autocleavage cofactor	730	1130	1
261533	262726	+	proA	b0243	gamma-glutamylphosphate reductase	84	130	1
485791	486378	+	acrR	b0464	transcriptional repressor	33	51	1
2053673	2054929	+	shiA	b1981	shikimate transporter	11	17	1
4396095	4397372	+	amiB	b4169	N-acetylmuramoyl-l-alanine amidase II	22	34	1
4524980	4524135	-	yjhH	b4298	putative lyase/synthase	11	17	1
3377390	3376812	-	sspA	b3229	stringent starvation protein A, phage P1 late gene activator, RNAP-associated acid-resistance protein, inactive glutathione S-transferase homolog	710	1097	1
606169	605981	-	ybdJ	b0580	DUF1158 family putative inner membrane protein	68	105	1
2905388	2904777	-	queE	b2777	7-carboxy-7-deazaguanine synthase; queosine biosynthesis	135	208	1
2400135	2397469	-	nuoG	b2283	NADH:ubiquinone oxidoreductase, chain G	283	436	1
949698	950228	+	ycaK	b0901	putative NAD(P)H-dependent oxidoreductase	13	20	1
1945326	1944376	-	ruvB	b1860	ATP-dependent DNA helicase, component of RuvABC resolvasome	41	63	1
3867392	3867039	-	ibpA	b3687	heat shock chaperone	41	63	1
2461336	2462616	+	fadL	b2344	long-chain fatty acid outer membrane transporter	71	109	1
2444139	2443921	-	yfcL	b2325	uncharacterized protein	141	216	1
916503	918101	+	ybjD	b0876	putative OLD family ATP-dependent endonuclease; DUF2813 family protein	17	26	1
2558888	2560036	+	intZ	b2442	CPZ-55 prophage; putative phage integrase	19	29	1
444713	445144	+	yajQ	b0426	phage Phi6 host factor, ATP/GTP binding protein	818	1244	1
1329082	1328384	-	yciK	b1271	putative EmrKY-TolC system oxoacyl-(acyl carrier protein) reductase	35	53	1
866334	865159	-	moeA	b0827	molybdopterin molybdenumtransferase; molybdopterin biosynthesis protein	125	189	1
436619	437077	+	pgpA	b0418	phosphatidylglycerophosphatase A	43	65	1
146998	147840	+	yadD	b0132	transposase_31 family protein	6	9	1
292918	292352	-	yagK	b0277	CP4-6 prophage; conserved protein	2	3	1
401777	403132	+	phoA	b0383	bacterial alkaline phosphatase	2	3	1
467282	465642	-	ybaE	b0445	putative ABC superfamily transporter periplasmic-binding protein	4	6	1
624480	623584	-	fepB	b0592	iron-enterobactin transporter subunit	2	3	1
890943	891170	+	ybjC	b0850	DUF1418 family protein	28	42	1
929165	927504	-	cydC	b0886	fused glutathione, cysteine exporter subunits of ABC superfamily: membrane component/ATP-binding component	46	69	1
940989	943373	+	dmsA	b0894	dimethyl sulfoxide reductase, anaerobic, subunit A	2	3	1
1056291	1057259	+	torT	b0994	periplasmic sensory protein associated with the TorRS two-component regulatory system	8	12	1
1273814	1275148	+	ychO	b1220	putative invasin	2	3	1
1371939	1373171	+	ycjN	b1310	putative ABC superfamily sugar transporter periplasmic-binding protein	4	6	1
1445910	1446176	+	ydbL	b1383	DUF1318 family protein	32	48	1
1460923	1462068	+	paaJ	b1397	3-oxoadipyl-CoA/3-oxo-5,6-dehydrosuberyl-CoA thiolase	2	3	1
2162906	2164249	+	baeS	b2078	sensory histidine kinase in two-component regulatory system with BaeR	2	3	1
2425886	2425260	-	hisQ	b2308	histidine/lysine/arginine/ornithine transporter permease subunit	2	3	1
2629822	2630280	+	yfgH	b2505	outer membrane integrity lipoprotein	2	3	1
2771178	2771585	+	yfjT	b2637	CP4-57 prophage; putative periplasmic protein	6	9	1
2825546	2824521	-	mltB	b2701	membrane-bound lytic murein transglycosylase B	22	33	1
2841020	2842384	+	ascB	b2716	cryptic 6-phospho-beta-glucosidase	4	6	1
2922070	2920778	-	gudP	b2789	putative D-glucarate transporter	6	9	1
2973832	2972699	-	lplT	b2835	lysophospholipid transporter	6	9	1
3028982	3028554	-	ygfS	b2886	putative 4Fe-4S ferredoxin-type oxidoreductase subunit	4	6	1
3030901	3029042	-	ygfT	b2887	putative oxidoreductase, Fe-S subunit/nucleotide-binding subunit	4	6	1
3170514	3171803	+	qseC	b3026	quorum sensing sensory histidine kinase in two-component regulatory system with QseB	6	9	1
3192894	3194495	+	yqiK	b3051	PHB family membrane protein, function unknown	2	3	1
3287456	3287980	+	yraH	b3142	putative fimbrial-like adhesin protein	2	3	1
3299996	3300238	+	yhbQ	b3155	GIY-YIG nuclease superfamily protein	16	24	1
3422466	3423164	+	yhdZ	b3271	putative amino-acid transporter subunit	2	3	1
3692577	3690298	-	bcsB	b3532	regulator of cellulose synthase, cyclic di-GMP binding	2	3	1
3735009	3736127	+	xylR	b3569	xylose divergent operon transcriptional activator	2	3	1
3796009	3796908	+	waaC	b3621	ADP-heptose:LPS heptosyl transferase I	24	36	1
3899363	3898701	-	yieK	b3718	putative 6-phosphogluconolactonase	2	3	1
4315072	4314374	-	phnP	b4092	5-phospho-alpha-D-ribosyl 1,2-cyclic phosphate phosphodiesterase	4	6	1
4498625	4499470	+	insD1	b4273	IS2 transposase TnpB	4	6	1
4581432	4580098	-	hsdS	b4348	specificity determinant for hsdM and hsdR	14	21	1
4636726	4638090	+	creC	b4399	sensory histidine kinase in two-component regulatory system with CreB or PhoB, regulator of the CreBC regulon	4	6	1
236097	236768	+	dnaQ	b0215	DNA polymerase III epsilon subunit	96	143	1
3965600	3964395	-	rhlB	b3780	ATP-dependent RNA helicase	268	399	1
2829843	2830748	+	srlQ	b2708	D-arabinose 5-phosphate isomerase	43	64	1
3168216	3167881	-	mqsA	b3021	antitoxin for MqsR toxin; transcriptional repressor	43	64	1
672156	671635	-	lptE	b0641	LPS assembly OM complex LptDE, lipoprotein component	146	217	1
2313518	2316130	+	rcsD	b2216	phosphotransfer intermediate protein in two-component regulatory system with RcsBC	35	52	1
4416740	4416471	-	bsmA	b4189	bioflm peroxide resistance protein	89	132	1
3341296	3342222	+	kdsD	b3197	D-arabinose 5-phosphate isomerase	58	86	1
4633715	4633263	-	yjjX	b4394	non-canonical purine NTP phosphatase, ITPase/XTPase	25	37	1
2911309	2911121	-	mazE	b2783	antitoxin of the ChpA-ChpR toxin-antitoxin system	46	68	1
4052075	4053388	+	hemN	b3867	coproporphyrinogen III oxidase, SAM and NAD(P)H dependent, oxygen-independent	69	102	1
2894226	2894741	+	ygcP	b2768	putative antiterminator regulatory protein	21	31	1
3855581	3855144	-	yidF	b3674	putative Cys-type oxidative YidJ-maturating enzyme	19	28	1
2925378	2926166	+	queF	b2794	7-cyano-7-deazaguanine reductase (NADPH-dependent)	55	81	1
3311138	3309063	-	pnp	b3164	polynucleotide phosphorylase/polyadenylase	909	1335	1
1179661	1180329	+	cobB	b1120	deacetylase of acs and cheY, chemotaxis regulator	106	155	1
256557	257741	+	frsA	b0239	fermentation-respiration switch protein; PTS Enzyme IIA(Glc)-binding protein; pNP-butyrate esterase activity	92	134	1
1490932	1491402	+	cybB	b1418	cytochrome b561	149	217	1
1203298	1203795	+	ymfL	b1147	e14 prophage; putative DNA-binding transcriptional regulator	22	32	1
2447443	2446418	-	aroC	b2329	chorismate synthase	55	80	1
3957790	3956957	-	ilvY	b3773	transcriptional activator of ilvC; autorepressor	11	16	1
1622676	1622711	+	yneM	b4599	inner membrane-associated protein	590	858	1
4554606	4555319	+	uxuR	b4324	fructuronate-inducible hexuronate regulon transcriptional repressor; autorepressor	75	109	1
4256436	4254073	-	plsB	b4041	glycerol-3-phosphate O-acyltransferase	102	148	1
3475688	3475362	-	tusD	b3345	sulfurtransferase for 2-thiolation step of mnm(5)-s(2)U34-tRNA synthesis	20	29	1
2319846	2317057	-	rcsC	b2218	hybrid sensory kinase in two-component regulatory system with RcsB and YojN	9	13	1
2411322	2409550	-	yfbS	b2292	putative transporter	9	13	1
2937468	2938856	+	fucK	b2803	L-fuculokinase	9	13	1
3583513	3583728	+	insA	b3444	IS1 repressor TnpA	18	26	1
3776695	3776997	+	yibL	b3602	ribosome-associated DUF2810 family protein	129	186	1
2591277	2591573	+	yffB	b2471	putative ArsC family reductase	145	209	1
192902	193399	+	frr	b0172	ribosome recycling factor	1082	1559	1
3537415	3539676	+	yhgF	b3407	putative transcriptional accessory protein	32	46	1
175137	176498	+	clcA	b0155	H(+)/Cl(-) exchange transporter	49	70	1
898019	898447	+	ybjO	b0858	DUF2593 family inner membrane protein	7	10	1
1836103	1837209	+	ynjB	b1754	putative ABC superfamily transporter periplasmic-binding protein	7	10	1
2059660	2058233	-	yeeO	b1985	putative multdrug exporter, MATE family	7	10	1
3484248	3484406	+	yheU	b3354	UPF0270 family protein	63	90	1
2460904	2460680	-	yfcZ	b2343	UPF0381 family protein	922	1314	1
1149758	1150627	+	fabD	b1092	malonyl-CoA-[acyl-carrier-protein] transacylase	667	949	1
2816409	2814913	-	gshA	b2688	glutamate-cysteine ligase	135	192	1
1157899	1159272	+	ptsG	b1101	fused glucose-specific PTS enzymes: IIB component/IIC component	174	247	1
922943	923203	+	clpS	b0881	regulatory protein for ClpA substrate specificity	86	122	1
3431932	3431450	-	yrdD	b3283	putative DNA topoisomerase	67	95	1
111074	111403	+	mutT	b0099	nucleoside triphosphate pyrophosphohydrolase, marked preference for dGTP	24	34	1
1353598	1352666	-	sapD	b1291	antimicrobial peptide transport ABC system ATP-binding protein	36	51	1
1917540	1920113	+	yebT	b1834	MCE domain protein	12	17	1
3474935	3474708	-	tusB	b3343	mnm(5)-s(2)U34-tRNA synthesis 2-thiolation protein	12	17	1
3504082	3504753	+	frlR	b3375	putative DNA-binding transcriptional regulator	24	34	1
4230384	4231196	+	rluF	b4022	23S rRNA pseudouridine(2604) synthase	36	51	1
4273841	4271079	-	uvrA	b4058	ATPase and DNA damage recognition protein of nucleotide excision repair excinuclease UvrABC	94	133	1
4640972	4641598	+	yjtD	b4403	putative methyltransferase	41	58	1
1272537	1273172	+	chaC	b1218	cation transport regulator	5	7	1
1779271	1778420	-	ydiP	b1696	putative DNA-binding transcriptional regulator	5	7	1
1823545	1824372	+	cho	b1741	endonuclease of nucleotide excision repair	15	21	1
2374973	2373678	-	menE	b2260	O-succinylbenzoate-CoA ligase	10	14	1
3295839	3296369	+	diaA	b3149	DnaA initiator-associating factor for replication initiation	75	105	1
4073769	4074605	+	yihV	b3883	putative sugar kinase	5	7	1
4531621	4530560	-	sgcX	b4305	putative endoglucanase with Zn-dependent exopeptidase domain	10	14	1
1948121	1947441	-	yebC	b1864	UPF0082 family protein	689	962	1
2295556	2295407	-	ccmD	b2198	cytochrome c biogenesis protein	28	39	1
193551	194687	+	dxr	b0173	1-deoxy-D-xylulose 5-phosphate reductoisomerase	51	71	1
3777429	3779024	+	lldP	b3603	L-lactate permease	41	57	1
3301246	3300782	-	yhbT	b3157	SCP-2 sterol transfer family protein	100	139	1
2925250	2924765	-	syd	b2793	SecY-interacting protein	67	93	1
4256667	4256975	+	dgkA	b4042	diacylglycerol kinase	75	104	1
4128365	4128108	-	metJ	b3938	transcriptional repressor, S-adenosylmethionine-binding	761	1055	1
1945946	1945395	-	ruvA	b1861	component of RuvABC resolvasome, regulatory subunit	96	133	1
2773348	2774991	+	yfjW	b2642	CP4-57 prophage; putative inner membrane protein	13	18	1
2975984	2973885	-	aas	b2836	fused 2-acylglycerophospho-ethanolamine acyl transferase/acyl-acyl carrier protein synthetase	13	18	1
4274155	4274631	+	ssb	b4059	single-stranded DNA-binding protein	614	849	1
674753	672231	-	leuS	b0642	leucyl-tRNA synthetase	230	318	1
1503747	1504835	+	insQ	b1432	IS609 transposase B	21	29	1
1352604	1351858	-	sapF	b1290	antimicrobial peptide transport ABC system ATP-binding protein	29	40	1
919265	920320	+	macA	b0878	macrolide transporter subunit, membrane fusion protein (MFP) component	16	22	1
1848867	1850663	+	sppA	b1766	protease IV (signal peptide peptidase)	24	33	1
4148287	4147496	-	yijO	b3954	AraC family putative transcriptional activator	8	11	1
4528887	4528141	-	sgcQ	b4303	putative nucleoside triphosphatase	8	11	1
1492041	1491952	-	hokB	b4428	toxic polypeptide, small	16	22	1
3055642	3055911	+	zapA	b2910	FtsZ stabilizer	451	618	1
3247803	3248405	+	yqjA	b3095	general envelope maintenance protein; DedA family inner membrane protein	125	171	1
3270562	3270246	-	rnpB	b3123	-	1144	1562	1
3403302	3401422	-	csrD	b3252	targeting factor for csrBC sRNA degradation	11	15	1
3436548	3437864	+	trkA	b3290	NAD-binding component of TrK potassium transporter	44	60	1
4333242	4332211	-	basS	b4112	sensory histidine kinase in two-component regulatory system with BasR	11	15	1
136887	136600	-	yacC	b0122	PulS_OutS family protein	80	109	1
1697022	1696492	-	uidR	b1618	transcriptional repressor	100	136	1
141461	141937	+	hpt	b0125	hypoxanthine phosphoribosyltransferase	256	348	1
3471299	3470175	-	tufA	b3339	translation elongation factor EF-Tu 1	9718	13202	1
755207	755536	+	sdhC	b0721	succinate dehydrogenase, membrane subunit, binds cytochrome b556	1039	1410	1
1991871	1991845	-	leuZ	b1909	Leu tRNA	58407	79230	1
1203852	1204130	+	ymfM	b1148	e14 prophage; uncharacterized protein	17	23	1
142640	142038	-	can	b0126	carbonic anhydrase	97	131	1
1797914	1795587	-	pheT	b1713	phenylalanine tRNA synthetase, beta subunit	257	347	1
1074272	1074850	+	rutR	b1013	rut operon transcriptional repressor for	20	27	1
2754926	2755348	+	smpB	b2620	trans-translation protein	260	350	1
1144337	1141212	-	rne	b1084	fused ribonucleaseE: endoribonuclease/RNA-binding protein/RNA degradosome binding protein	251	337	1
3997213	3997869	+	yigB	b3812	5-amino-6-(5-phospho-D-ribitylamino)uracil phosphatase; pyrimidine phosphatase; riboflavin synthesis	47	63	1
3720079	3720231	+	cspA	b3556	RNA chaperone and antiterminator, cold-inducible	17952	24049	1
2642814	2641861	-	rodZ	b2516	MreB assembly cytoskeletal protein	142	190	1
4034638	4035123	+	hemG	b3850	protoporphyrin oxidase, flavoprotein	80	107	1
1992787	1992299	-	pgsA	b1912	phosphatidylglycerophosphate synthetase	146	195	1
125725	127557	+	aceF	b0115	pyruvate dehydrogenase, dihydrolipoyltransacetylase component E2	2657	3548	1
40356	39274	-	caiA	b0039	crotonobetaine reductase subunit II, FAD-binding	9	12	1
47276	47746	+	kefF	b0046	potassium-efflux system ancillary protein for KefC, glutathione-regulated; quinone oxidoreductase, FMN-dependent	6	8	1
65750	63459	-	polB	b0060	DNA polymerase II	12	16	1
234846	235508	+	yafS	b0213	putative S-adenosyl-L-methionine-dependent methyltransferase	15	20	1
356201	357424	+	codA	b0337	cytosine/isoguanine deaminase	45	60	1
912120	911212	-	hcr	b0872	HCP oxidoreductase, NADH-dependent	3	4	1
1027743	1027141	-	yccT	b0964	UPF0319 family protein	3	4	1
1646435	1646707	+	flxA	b1566	Qin prophage; uncharacterized protein	3	4	1
1667189	1666554	-	ynfK	b1593	putative dethiobiotin synthetase	6	8	1
2251730	2252758	+	yeiI	b2160	putative kinase	6	8	1
2770711	2771094	+	yfjS	b2636	CP4-57 prophage; uncharacterized protein	3	4	1
3295424	3295759	+	yraN	b3148	UPF0102 family protein	12	16	1
3546589	3547845	+	gntT	b3415	gluconate transporter, high-affinity GNT I system	3	4	1
3623429	3623752	+	yhhH	b3483	putative immunity protein for putative polymorphic toxin RhsB	3	4	1
3643102	3642410	-	rsmJ	b3497	16S rRNA m(2)G1516 methyltransferase, SAM-dependent	9	12	1
3855940	3855638	-	yidG	b3675	inner membrane protein	6	8	1
3996317	3997153	+	xerC	b3811	site-specific tyrosine recombinase	33	44	1
4514278	4513436	-	fecB	b4290	iron-dicitrate transporter subunit	6	8	1
4518205	4517744	-	fecI	b4293	RNA polymerase, sigma 19 factor	3	4	1
4451088	4452530	+	ytfR	b4485	putative ABC superfamily sugar transporter ATP-binding subunit	3	4	1
93196	94623	+	murE	b0085	UDP-N-acetylmuramoyl-L-alanyl-D-glutamate:meso-diaminopimelate ligase	91	121	1
1331078	1333615	+	topA	b1274	DNA topoisomerase I, omega subunit	86	114	1
1016440	1015982	-	fabA	b0954	beta-hydroxydecanoyl thioester dehydrase	744	986	1
515743	514886	-	qmcA	b0489	PHB domain membrane-anchored putative protease	108	143	1
4112184	4111645	-	yiiQ	b3920	DUF1454 family putative periplasmic protein	31	41	1
1719906	1720313	+	slyB	b1641	outer membrane lipoprotein	2143	2834	1
106587	107444	+	lpxC	b0096	UDP-3-O-acyl N-acetylglucosamine deacetylase	1283	1696	1
3397765	3396356	-	rng	b3247	ribonuclease G	56	74	1
1483091	1486933	+	hrpA	b1413	putative ATP-dependent helicase	63	83	1
2767014	2767325	+	rnlB	b2631	CP4-57 prophage; uncharacterized protein	82	108	1
1203054	1203194	+	croE	b1146	e14 prophage; putative DNA-binding transcriptional regulator	19	25	1
2262335	2261457	-	fruK	b2168	fructose-1-phosphate kinase	16	21	1
2421355	2421657	+	folX	b2303	D-erythro-7,8-dihydroneopterin triphosphate 2'-epimerase and dihydroneopterin aldolase	192	252	1
98433	99617	+	ftsW	b0089	lipid II flippase; integral membrane protein involved in stabilizing FstZ ring during cell division	39	51	1
279845	279630	-	insA	b0265	IS1 repressor TnpA	13	17	1
3752022	3752936	+	yiaU	b3585	putative DNA-binding transcriptional regulator	13	17	1
3405466	3405876	+	accB	b3255	acetyl CoA carboxylase, BCCP subunit	375	490	1
2373508	2373302	-	pmrD	b2259	inactive two-component system connector protein	124	162	1
90124	91005	+	rsmH	b0082	16S rRNA m(4)C1402 methyltransferase, SAM-dependent	86	112	1
1839497	1840744	+	ynjE	b1757	molybdopterin synthase sulfurtransferase	10	13	1
419621	420880	+	brnQ	b0401	branched-chain amino acid transport system 2 carrier protein; LIV-II transport system for Ile, Leu, and Val	67	87	1
4119300	4118875	-	rraA	b3929	ribonuclease E (RNase E) inhibitor protein	493	640	1
1916288	1917511	+	yebS	b1833	inner membrane protein	17	22	1
2942537	2941680	-	gcvA	b2808	glycine cleavage system transcriptional activator; autorepressor	24	31	1
671575	670604	-	holA	b0640	DNA polymerase III, delta subunit	21	27	1
2275303	2276268	+	yejE	b2179	microcin C transporter YejABEF, permease subunit; ABC family	7	9	1
3075165	3074716	-	yggD	b2929	MtlR family putative transcriptional repressor	7	9	1
669006	668749	-	rsfS	b0637	ribosomal silencing factor	176	226	1
2070150	2069845	-	insC1	b1997	IS2 repressor TnpA	25	32	1
2395315	2395073	-	nuoK	b2279	NADH:ubiquinone oxidoreductase, membrane subunit K	229	293	1
134418	134720	+	yacL	b0119	UPF0231 family protein	277	354	1
2718765	2719124	+	trxC	b2582	thioredoxin 2	108	138	1
2659856	2659593	-	iscA	b2528	FeS cluster assembly protein	253	323	1
99674	100681	+	murG	b0090	N-acetylglucosaminyl transferase	62	79	1
1386750	1388231	+	tyrR	b1323	aromatic amino acid biosynthesis and transport regulon transcriptional regulator; autorepressor; ATPase; phosphatase	62	79	1
103185	103955	+	ftsQ	b0093	divisome assembly protein, membrane anchored protein involved in growth of wall at septum	44	56	1
478587	477097	-	ylaB	b0457	putative membrane-anchored cyclic-di-GMP phosphodiesterase	11	14	1
2512676	2511498	-	mntH	b2392	manganese/divalent cation transporter	11	14	1
2722757	2724052	+	pssA	b2585	phosphatidylserine synthase (CDP-diacylglycerol-serine O-phosphatidyltransferase)	96	122	1
1645603	1645376	-	relE	b1563	Qin prophage; toxin of the RelE-RelB toxin-antitoxin system	41	52	1
2401525	2400248	-	nuoF	b2284	NADH:ubiquinone oxidoreductase, chain F	215	272	1
701564	700404	-	nagC	b0676	N-acetylglucosamine-inducible nag divergent operon transcriptional repressor	99	125	1
2639253	2638693	-	yfgM	b2513	putative anti-RcsB factor	267	337	1
970882	971568	+	kdsB	b0918	3-deoxy-manno-octulosonate cytidylyltransferase	138	174	1
1024501	1026495	+	helD	b0962	DNA helicase IV	43	54	1
3265998	3265069	-	tdcB	b3117	L-threonine dehydratase, catabolic	47	59	1
1660586	1662949	+	ynfF	b1588	S- and N-oxide reductase, A subunit, periplasmic	4	5	1
2555698	2555258	-	eutK	b2438	putative ethanol utilization carboxysome structural protein	16	20	1
2562554	2563087	+	yffP	b2447	CPZ-55 prophage; uncharacterized protein	4	5	1
2997247	2996402	-	insD1	b2860	IS2 transposase TnpB	4	5	1
3860313	3861146	+	yidL	b3680	AraC family putative transcriptional regulator	4	5	1
3978631	3979923	+	wzyE	b3793	putative ECA polysaccharide chain elongation protein	4	5	1
4526858	4526136	-	sgcR	b4300	putative DNA-binding transcriptional regulator	4	5	1
4617035	4615545	-	yjjI	b4380	DUF3029 family protein, putative glycine radical enzyme	4	5	1
465517	464882	-	queC	b0444	7-cyano-7-deazaguanine (preQ0) synthase; queuosine biosynthesis	109	136	1
2393011	2391542	-	nuoM	b2277	NADH:ubiquinone oxidoreductase, membrane subunit M	109	136	1
4010230	4010970	+	yigL	b3826	pyridoxal phosphate phosphatase	81	101	1
2437821	2436745	-	pdxB	b2320	erythronate-4-phosphate dehydrogenase	110	137	1
1305794	1306738	+	oppF	b1247	oligopeptide transporter subunit	260	323	1
3785290	3786774	+	gpmM	b3612	phosphoglycero mutase III, cofactor-independent	124	154	1
3092967	3093470	+	yqgE	b2948	uncharacterized protein	79	98	1
3950352	3950390	+	ilvL	b3766	ilvG operon leader peptide	458	568	1
1355440	1354535	-	sapB	b1293	antimicrobial peptide transport ABC transporter permease	25	31	1
3043593	3043342	-	yqfB	b2900	UPF0267 family protein	130	161	1
144607	144987	+	yadI	b0129	putative PTS Enzyme IIA	42	52	1
1726053	1726592	+	nemR	b1649	transcriptional repressor for the nemRA-gloA operon, quinone-, glyoxal-, and HOCl-activated	21	26	1
3526499	3528574	+	yrfF	b3398	inner membrane protein	21	26	1
376802	377281	+	yaiL	b0354	DUF2058 family protein	102	126	1
4418423	4417728	-	ulaR	b4191	transcriptional repressor for the L-ascorbate utilization (ula) divergent operon	17	21	1
3053488	3052370	-	ubiH	b2907	2-octaprenyl-6-methoxyphenol hydroxylase, FAD/NAD(P)-binding	77	95	1
790999	790013	-	galT	b0758	galactose-1-phosphate uridylyltransferase	60	74	1
644973	644227	-	rna	b0611	ribonuclease I	56	69	1
1113609	1113776	+	yceK	b1050	outer membrane integrity lipoprotein	13	16	1
1268195	1268989	+	kdsA	b1215	3-deoxy-D-manno-octulosonate 8-phosphate synthase	375	461	1
3343410	3343907	+	lptA	b3200	periplasmic LPS-binding protein	318	390	1
2194138	2193089	-	mrp	b2113	antiporter inner membrane protein	367	450	1
123047	125650	+	aceE	b0114	pyruvate dehydrogenase, decarboxylase component E1, thiamine triphosphate-binding	3029	3710	1
2750678	2750145	-	grpE	b2614	heat shock protein	793	971	1
22421	25177	+	ileS	b0026	isoleucyl-tRNA synthetase	304	372	1
795119	795832	+	modA	b0763	molybdate transporter subunit	36	44	1
2402022	2401582	-	nuoE	b2285	NADH:ubiquinone oxidoreductase, chain E	441	539	1
2522447	2521623	-	xapR	b2405	transcriptional activator of xapAB	9	11	1
2962398	2959090	-	recC	b2822	exonuclease V (RecBCD complex), gamma chain	9	11	1
4518557	4518772	+	insA	b4294	IS1 repressor TnpA	9	11	1
3324040	3322763	-	glmM	b3176	phosphoglucosamine mutase	271	331	1
3337861	3337286	-	mlaC	b3192	ABC transporter maintaining OM lipid asymmetry, periplasmic binding protein	299	365	1
1952296	1952631	+	yecN	b1869	MAPEG family inner membrane protein	41	50	1
632212	632349	+	ybdD	b4512	DUF466 family protein	137	167	1
135552	134818	-	speD	b0120	S-adenosylmethionine decarboxylase	96	117	1
2978869	2977667	-	lysA	b2838	diaminopimelate decarboxylase, PLP-binding	32	39	1
4457835	4457344	-	yjgA	b4234	ribosome-associated UPF0307 family protein	166	202	1
57079	54785	-	lptD	b0054	LPS assembly OM complex LptDE, beta-barrel component	195	237	1
927402	926758	-	aat	b0885	leucyl/phenylalanyl-tRNA-protein transferase	14	17	1
3941297	3940665	-	yieP	b3755	putative transcriptional regulator	187	227	1
1303864	1304712	+	oppC	b1245	oligopeptide transporter subunit	173	210	1
235972	235565	-	rnhA	b0214	ribonuclease HI, degrades RNA of DNA-RNA hybrids	33	40	1
1916098	1915661	-	msrC	b1832	free methionine-(R)-sulfoxide reductase	231	280	1
53386	52457	-	pdxA	b0052	4-hydroxy-L-threonine phosphate dehydrogenase, NAD-dependent	43	52	1
160574	160179	-	dksA	b0145	transcriptional regulator of rRNA transcription, DnaK suppressor protein	1009	1220	1
1190417	1189806	-	phoP	b1130	response regulator in two-component regulatory system with PhoQ	314	378	1
2395866	2395372	-	nuoJ	b2280	NADH:ubiquinone oxidoreductase, membrane subunit J	173	208	1
1340588	1341697	+	yciM	b1280	envelope integrity maintenance protein; EnvC-interacting protein	35	42	1
1354488	1353658	-	sapC	b1292	antimicrobial peptide transport ABC transporter permease	30	36	1
3064023	3064748	+	scpB	b2919	methylmalonyl-CoA decarboxylase, biotin-independent	5	6	1
3104463	3105482	+	mltC	b2963	membrane-bound lytic murein transglycosylase C	5	6	1
3182377	3181649	-	ygiD	b3039	4,5- DOPA-extradiol-dioxygenase	5	6	1
3200935	3199694	-	ygiF	b3054	inorganic triphosphatase	40	48	1
3535838	3534546	-	envZ	b3404	sensory histidine kinase in two-component regulatory system with OmpR	20	24	1
4389340	4386077	-	mscM	b4159	mechanosensitive channel protein, miniconductance	10	12	1
4503401	4502133	-	insG	b4278	IS4 transposase	5	6	1
2709982	2709467	-	rpoE	b2573	RNA polymerase sigma E factor	126	151	1
2043527	2043498	-	serU	b1975	Ser tRNA	2137	2552	1
424888	424367	-	acpH	b0404	acyl carrier protein (ACP) phosphodiesterase; ACP hydrolyase	31	37	1
1717977	1717381	-	pdxH	b1638	pyridoxine 5'-phosphate oxidase	73	87	1
2185766	2185554	-	rcnR	b2105	transcriptional repressor of rcnA	42	50	1
4444142	4447861	+	tamB	b4221	translocation and assembly module for autotransporter export, inner membrane subunit	16	19	1
1188210	1187149	-	roxA	b1128	50S ribosomal protein L16 arginine hydroxylase; 2-oxoglutarate oxygenase	199	236	1
96032	97054	+	mraY	b0087	phospho-N-acetylmuramoyl-pentapeptide transferase	70	83	1
2008060	2007707	-	yedD	b1928	lipoprotein	315	373	1
1228109	1228708	+	ycgM	b1180	putative isomerase/hydrolase	99	117	1
1896200	1896718	+	nudL	b1813	putative CoA pyrophosphohydrolase, weak 3-phosphohydroxypyruvate phosphatase	22	26	1
2310375	2309371	-	ada	b2213	fused DNA-binding transcriptional dual regulator/O6-methylguanine-DNA methyltransferase	17	20	1
2221959	2219722	-	bglX	b2132	beta-D-glucoside glucohydrolase, periplasmic	40	47	1
2500413	2501087	+	ypdB	b2381	response regulator activating yhjX; pyruvate-responsive YpdAB two-component system	23	27	1
1222604	1222335	-	ymgD	b1171	uncharacterized protein	29	34	1
3979986	3980666	+	wecG	b3794	UDP-N-acetyl-D-mannosaminuronic acid transferase	29	34	1
389697	388783	-	hemB	b0369	5-aminolevulinate dehydratase (porphobilinogen synthase)	270	316	1
3648324	3648347	+	agrB	b4713	-	47	55	1
399623	399775	+	yaiZ	b0380	DUF2754 family putative inner membrane protein	498	581	1
842362	843228	+	rlmF	b0807	23S rRNA m(6)A1618 methyltransferase, SAM-dependent	54	63	1
1469388	1470479	+	insI1	b1404	IS30 transposase	12	14	1
1739768	1738896	-	ydhB	b1659	LysR family putative transcriptional regulator	12	14	1
3045871	3045188	-	ygfF	b2902	putative NAD(P)-dependent oxidoreductase with NAD(P)-binding Rossmann-fold domain	12	14	1
4002769	4002449	-	yigF	b3817	putative inner membrane protein	6	7	1
4345528	4344959	-	yjdF	b4121	DUF2238 family inner membrane protein	6	7	1
4636037	4636666	+	creB	b4398	response regulator in two-component regulatory system with CreC	12	14	1
3873582	3873025	-	dgoA	b4477	2-oxo-3-deoxygalactonate 6-phosphate aldolase	6	7	1
146664	146344	-	panD	b0131	aspartate 1-decarboxylase	227	264	1
2861204	2860497	-	ygbI	b2735	DeoR family putative transcriptional regulator	62	72	1
1959236	1958550	-	cutC	b1874	copper homeostasis protein	64	74	1
2952431	2950665	-	recD	b2819	exonuclease V (RecBCD complex), alpha chain	13	15	1
1357638	1357453	-	ymjA	b1295	DUF2543 family protein	59	68	1
2033049	2032414	-	yedJ	b1962	putative HD superfamily phosphohydrolase	20	23	1
3698056	3698187	+	bcsF	b3537	DUF2636 family small membrane protein associated with cellulose production	27	31	1
3293430	3295406	+	lpoA	b3147	OM lipoprotein stimulator of MrcA transpeptidase	61	70	1
2089683	2089492	-	yefM	b2017	antitoxin of the YoeB-YefM toxin-antitoxin system	388	445	1
1182799	1181813	-	potD	b1123	polyamine transporter subunit	193	221	1
3264987	3263716	-	tdcC	b3116	L-threonine/L-serine transporter	28	32	1
3856277	3855990	-	yidH	b3676	DUF202 family inner membrane protein	14	16	1
3872968	3871880	-	dgoD	b4478	galactonate dehydratase	7	8	1
3349779	3349111	-	mtgA	b3208	biosynthetic peptidoglycan transglycosylase	15	17	1
4018885	4019580	+	ubiE	b3833	bifunctional 2-octaprenyl-6-methoxy-1,4-benzoquinone methylase/ S-adenosylmethionine:2-DMK methyltransferase	288	326	1
1164125	1165090	+	nagZ	b1107	beta N-acetyl-glucosaminidase	78	88	1
3102103	3101837	-	yggL	b2959	DUF469 family protein	531	599	1
604633	603446	-	ybdG	b0577	mechanosensitive channel protein, miniconductance	47	53	1
2395016	2393235	-	nuoL	b2278	NADH:ubiquinone oxidoreductase, membrane subunit L	110	124	1
4214093	4213710	-	yjaB	b4012	putative acetyltransferase	55	62	1
508248	508529	+	ybaQ	b0483	putative DNA-binding transcriptional regulator	24	27	1
2979051	2979926	+	lysR	b2839	transcriptional activator of lysA; autorepressor	8	9	1
3766367	3767149	+	yibA	b3594	HEAT-domain lethality reduction protein; putative immunity protein for putative polymorphic toxin RhsA	24	27	1
4635551	4635964	+	creA	b4397	putative periplasmic protein	88	99	1
2349442	2348852	-	inaA	b2237	acid-inducible Kdo/WaaP family putative kinase	49	55	1
3085881	3083965	-	speA	b2938	biosynthetic arginine decarboxylase, PLP-binding	199	223	1
1390568	1389900	-	mpaA	b1326	murein peptide amidase A	25	28	1
2552108	2551743	-	ypeA	b2434	putative acyl-CoA transferase	92	103	1
2821981	2819411	-	alaS	b2697	alanyl-tRNA synthetase	251	281	1
476341	476012	-	ybaZ	b0454	excision repair protein, alkyltransferase-like protein ATL	26	29	1
1368831	1368995	+	pspB	b1305	psp operon transcription co-activator	132	147	1
1462155	1463408	+	paaK	b1398	phenylacetyl-CoA ligase	9	10	1
4494653	4495156	+	idnK	b4268	D-gluconate kinase, thermosensitive	9	10	1
3015190	3015708	+	mocA	b2877	CTP:molybdopterin cytidylyltransferase	55	61	1
3201921	3203099	+	cca	b3056	fused tRNA nucleotidyl transferase/2'3'-cyclic phosphodiesterase/2'nucleotidase and phosphatase	46	51	1
3724367	3722358	-	glyS	b3559	glycine tRNA synthetase, beta subunit	297	329	1
859998	859243	-	ybiV	b0822	sugar phosphatase; preference for fructose-1-P, ribose-5-P and glucose-6-P	19	21	1
1795522	1795283	-	ihfA	b1712	integration host factor (IHF), DNA-binding protein, alpha subunit	1442	1593	1
1792701	1792297	-	nlpC	b1708	putative C40 clan peptidase lipoprotein	69	76	1
3698244	3699863	+	bcsG	b3538	DUF3260 family inner membrane protein associated with cellulose production	10	11	1
3783631	3782672	-	gpsA	b3608	glycerol-3-phosphate dehydrogenase (NAD+)	133	146	1
2598835	2597861	-	bamC	b2477	BamABCDE complex OM biogenesis lipoprotein	297	326	1
865099	864410	-	moeB	b0826	molybdopterin synthase sulfurylase	63	69	1
434677	435087	+	ribE	b0415	riboflavin synthase beta chain	665	728	1
3681910	3680474	-	yhjJ	b3527	putative periplasmic M16 family chaperone	53	58	1
283231	285138	+	yagF	b0269	CP4-6 prophage; dehydratase family protein	11	12	1
1517678	1517851	+	ydcY	b1446	uncharacterized protein	527	574	1
3041040	3040834	-	sdhE	b2897	flavinator of succinate dehydrogenase; antitoxin of CptAB toxin-antitoxin pair	478	519	1
188620	186008	-	glnD	b0167	uridylyltransferase	12	13	1
223801	225282	+	rrsH	b0201	16S ribosomal RNA of rrnH operon	10969	11878	1
1151645	1151821	+	acpP	b1094	acyl carrier protein (ACP)	11240	12166	1
4208177	4209658	+	rrsE	b4007	16S ribosomal RNA of rrnE operon	10853	11706	1
2725716	2724478	-	kgtP	b2587	alpha-ketoglutarate transporter	738	796	1
794614	793886	-	modE	b0761	transcriptional repressor for the molybdenum transport operon modABC	90	97	1
4035561	4037042	+	rrsA	b3851	16S ribosomal RNA of rrnA operon	10940	11786	1
1669729	1670922	+	ynfM	b1596	putative arabinose efflux transporter	13	14	1
2272394	2274148	+	yejA	b2177	microcin C transporter YejABEF, periplasmic binding protein; ABC family	13	14	1
3989798	3989118	-	hemD	b3804	uroporphyrinogen III synthase	67	72	1
1308615	1307215	-	clsA	b1249	cardiolipin synthase 1	55	59	1
3941838	3943319	+	rrsC	b3756	16S ribosomal RNA of rrnC operon	11120	11928	1
4166689	4168170	+	rrsB	b3968	16S ribosomal RNA of rrnB operon	10950	11743	1
100795	102210	+	murC	b0091	UDP-N-acetylmuramate:L-alanine ligase	139	149	1
2170266	2170505	+	insE1	b2088	IS3 transposase A	29	31	1
91062	91367	+	ftsL	b0083	membrane bound cell division protein at septum containing leucine zipper motif	73	78	1
710616	710230	-	fur	b0683	ferric iron uptake regulon transcriptional repressor; autorepressor	820	876	1
27323	28177	+	rihC	b0030	ribonucleoside hydrolase 3	265	283	1
341155	342477	+	yahJ	b0324	putative metallo-dependent hydrolase domain deaminase	15	16	1
2339597	2340259	+	ubiG	b2232	bifunctional 3-demethylubiquinone-9 3-methyltransferase/ 2-octaprenyl-6-hydroxy phenol methylase	156	166	1
1392021	1392860	+	pgrR	b1328	murein peptide degradation regulator	16	17	1
3685588	3683660	-	yhjK	b3529	cyclic-di-GMP phosphodiesterase	16	17	1
4365326	4365048	-	cutA	b4137	divalent-cation tolerance protein, copper sensitivity	33	35	1
2638622	2637504	-	bamB	b2512	BamABCDE complex OM biogenesis lipoprotein	255	270	1
4395615	4396016	+	tsaE	b4168	tRNA(ANN) t(6)A37 threonylcarbamoyladenosine modification protein; ADP binding protein	93	98	1
4043448	4044014	+	dsbA	b3860	periplasmic protein disulfide isomerase I	354	373	1
1688347	1686761	-	fumA	b1612	fumarate hydratase (fumarase A), aerobic Class I	321	338	1
468413	468811	+	ybaO	b0447	putative DNA-binding transcriptional regulator	20	21	1
3630572	3629565	-	yhiI	b3487	putative membrane fusion protein (MFP) of efflux pump	80	84	1
2396420	2395938	-	nuoI	b2281	NADH:ubiquinone oxidoreductase, chain I	208	218	1
1487265	1488005	+	ydcF	b1414	DUF218 superfamily protein, SAM-binding	126	132	1
3794017	3794889	+	hldD	b3619	ADP-L-glycero-D-mannoheptose-6-epimerase, NAD(P)-binding	699	732	1
494106	494375	+	ybaB	b0471	DNA-binding protein, putative nucleoid-associated protein	506	529	1
2225831	2226349	+	yohD	b2136	DedA family inner membrane protein	45	47	1
400893	399859	-	ddlA	b0381	D-alanine-D-alanine ligase A	158	165	1
3536842	3537258	+	greB	b3406	transcript cleavage factor	23	24	1
2719983	2722583	+	pka	b2584	protein lysine acetyltransferase	71	74	1
1441088	1441294	+	ydbJ	b4529	DUF333 family putative lipoprotein	556	579	1
1988746	1989183	+	ftnA	b1905	ferritin iron storage protein (cytoplasmic)	1590	1646	1
712772	712068	-	ybfF	b0686	acyl-CoA esterase	58	60	1
4428687	4428109	-	ytfB	b4206	OapA family protein	89	92	1
1682000	1681725	-	ydgC	b1607	GlpM family inner membrane protein	31	32	1
1020889	1020440	-	sulA	b0958	SOS cell division inhibitor	192	198	1
2564553	2565302	+	yffS	b2450	CPZ-55 prophage; uncharacterized protein	163	168	1
1328327	1327797	-	btuR	b1270	cob(I)yrinic acid a,c-diamide adenosyltransferase	39	40	1
1700987	1702099	+	malY	b1622	bifunctional beta-cystathionase, PLP-dependent/ regulator of maltose regulon	41	42	1
713588	715168	+	pgm	b0688	phosphoglucomutase	314	321	1
476478	476531	+	ffs	b0455	-	12840	13093	1
18745	19590	+	nhaR	b0020	transcriptional activator of nhaA	55	56	1
4257145	4257693	+	lexA	b4043	transcriptional repressor of SOS regulon	338	344	1
3347145	3347939	+	yhbJ	b3205	adaptor protein RapZ for GlmZ/GlmY sRNA decay; glucosamine-6-phosphate regulated; NTPase	120	122	1
3428732	3427251	-	rrsD	b3278	16S ribosomal RNA of rrnD operon	22387	22760	1
1339360	1340064	+	pgpB	b1278	phosphatidylglycerophosphatase B	66	67	1
2731127	2729646	-	rrsG	b2591	16S ribosomal RNA of rrnG operon	22279	22492	1
1098909	1099586	+	ycdX	b1034	alkaline phosphatase	133	134	1
39085	37928	-	caiB	b0038	crotonobetainyl CoA:carnitine CoA transferase	6	6	1
45493	45720	+	fixX	b0044	putative 4Fe-4S ferredoxin-type protein	1	1	1
83499	81988	-	leuA	b0074	2-isopropylmalate synthase	4	4	1
85660	87324	+	ilvI	b0077	acetolactate synthase 3 large subunit	5	5	1
231956	232519	+	yafE	b0210	putative S-adenosyl-L-methionine-dependent methyltransferase	3	3	1
275355	276698	+	mmuP	b0260	CP4-6 prophage; putative S-methylmethionine transporter	3	3	1
306787	305204	-	ecpD	b0290	polymerized tip adhesin of ECP fibers	1	1	1
310641	310114	-	ecpA	b0293	ECP pilin	7	7	1
312747	312544	-	ykgM	b0296	50S ribosomal protein L31 type B; alternative L31 utilized during zinc limitation	4	4	1
315321	315560	+	insE1	b0298	IS3 transposase A	27	27	1
318289	317756	-	rclC	b0301	reactive chlorine species (RCS) stress resistance inner membrane protein	2	2	1
334992	334555	-	yahC	b0317	putative inner membrane protein	2	2	1
371269	372075	+	mhpC	b0349	2-hydroxy-6-ketonona-2,4-dienedioic acid hydrolase	1	1	1
373898	374851	+	mhpE	b0352	4-hyroxy-2-oxovalerate/4-hydroxy-2-oxopentanoic acid aldolase, class I	2	2	1
375489	376640	+	mhpT	b0353	3-hydroxyphenylpropionic transporter	1	1	1
387825	388616	+	tauD	b0368	taurine dioxygenase, 2-oxoglutarate-dependent	3	3	1
412451	411327	-	araJ	b0396	arabinose-inducible putative transporter, MFS family	4	4	1
467442	468200	+	cof	b0446	thiamine pyrimidine pyrophosphate hydrolase; HMP-PP phosphatase	9	9	1
472996	474222	+	amtB	b0451	ammonium transporter	1	1	1
490241	490140	-	ybaM	b0466	DUF2496 family protein	98	98	1
504666	503506	-	fsr	b0479	putative fosmidomycin efflux system protein	16	16	1
515949	516566	+	fetA	b0490	iron exporter, ATP-binding subunit, ABC transporter FetAB subunit; peroxide resistance protein	56	56	1
519119	518370	-	ybbO	b0493	putative oxidoreductase	46	46	1
533946	535667	+	gcl	b0507	glyoxylate carboligase	1	1	1
546333	545344	-	allD	b0517	ureidoglycolate dehydrogenase	1	1	1
558242	558724	+	sfmA	b0530	FimA homolog, function unknown	4	4	1
628581	629267	+	entA	b0596	2,3-dihydro-2,3-dihydroxybenzoate dehydrogenase	1	1	1
718235	716976	-	potE	b0692	putrescine/proton symporter: putrescine/ornithine antiporter	1	1	1
749677	749009	-	ybgP	b0717	putative periplasmic pilin chaperone	1	1	1
839177	838560	-	ybiX	b0804	Fe(II)-dependent oxygenase superfamily protein	1	1	1
878278	878601	+	bssR	b0836	repressor of biofilm formation by indole transport regulation	2	2	1
[truncated: 2,208 more rows]

## Sheet: 1E
Table S5. List of strains and plasmids used in this study
	Name	Description	Reference
Strains	MG1655	655 (F- λ- ΔilvG rfb-50 rph-1)	Blattner et al., 1997
	CRB016	MG1655 rho-R66S ilv-500::Tn10	Bastet et al., 2017
	AMD054	MG1655 ∆lacZ	Stringer et al., 2014
	AMD189	MG1655 ∆lacZ ∆thyA	Stringer et al., 2012
	GB001	MG1655 ∆lacZ ∆topAI-yjhQ(74)::thyA	This work
	GB004	MG1655 ∆lacZ rho-R66S	Baniulyte et al., 2017
Plasmids	pAMD-BA-lacZ	Single-copy lacZ reporter	Stringer et al., 2014
	pPro24	Proprionate-inducible expression	Lee and Keasling, 2005
	pET-PesaR-lux	Luciferase reporter	Shong and Collins, 2013
	pCS-PesaR-lux	Luciferase reporter	Shong and Collins, 2013
	pGB72	pET-PesaR-lux with constitutive promoter and Rho terminator	This work
	pGB135	pCS-PesaR-lux with a constitutive promoter	This work
	pJTW100	topAI-yjhQ(→90nt) translational fusion to lacZ	This work
	pGB81	topAI translational fusion to lacZ	This work
	pGB202	topAI (→-1) translational fusion to luxC	This work
	pGB366	topAI (→-1), toiL (S-D*) translational fusion to luxC	This work
	pGB313	topAI (→-1), toiL (ATG→gTa) translational fusion to luxC	This work
	pGB182	topAI (→-1) transcriptional fusion to lacZ	This work
	pGB297	topAI (→-1), toiL (ATG→gTa) transcriptional fusion to lacZ	This work
	pGB215	topAI (→+10) transcriptional fusion to lacZ	This work
	pGB217	topAI (→+42) transcriptional fusion to lacZ	This work
	pGB305	topAI (→+10) rut*(4xC→4xA) transcriptional fusion to lacZ	This work
	pGB306	topAI (→+42) rut*(4xC→4xA) transcriptional fusion to lacZ	This work
	pGB164	toiL translational fusion to lacZ	This work
	pGB196	toiL (AAT→tga) translational fusion to lacZ	This work
	pGB197	toiL (CTG→tga) translational fusion to lacZ	This work
	pGB200	toiL (ATG→tga) translational fusion to lacZ	This work
	pGB201	toiL (TTG→tga) translational fusion to lacZ	This work
	pGB323	toiL (→M1)-ermCL(S10→) translational fusion to luxC	This work
	pGB346	toiL (→L2)-ermCL(S10→) translational fusion to luxC	This work
	pGB325	toiL (→E3)-ermCL(S10→) translational fusion to luxC	This work
	pGB326	toiL (→N4)-ermCL(S10→) translational fusion to luxC	This work
	pGB324	toiL (→V5)-ermCL(S10→) translational fusion to luxC	This work
	pGB327	toiL (→V5L)-ermCL(S10→) translational fusion to luxC	This work
	pGB328	toiL (→I6)-ermCL(S10→) translational fusion to luxC	This work
	pGB329	toiL (→I7)-ermCL(S10→) translational fusion to luxC	This work
	pGB307	toiL (→R8)-ermCL(S10→) translational fusion to luxC	This work
	pGB347	toiL (→Stop9)-ermCL(S10→) translational fusion to luxC	This work
	pGB308	toiL 5' UTR-ermCL translational fusion to luxC	This work
	pGB318	pPro24 with mutant rRNA operon (23S RNA ΔT1917)	This work
	pGB322	pPro24 with wild-type rRNA operon	This work

## Sheet: 1F
Table S6. List of oligonucleotides used in this study.
Name	Sequence	Description
JW5638	GGACGGATCCTCGAGCATGCTTTTCAAGCATCGAAGATGGG	Cloning: topAI fwd into pAMD-BA-lacZ
JW5839	GGCCAGTGCCAAGCTTGCGCTGAAGCCAAATGCG	Cloning: yjhQ(90)-lacZ translational fusion rev into pAMD-BA-lacZ
JW8023	GGCCAGTGCCAAGCTTGCGCGATTATCGAGCTGAGCG	Cloning: topAI-lacZ translational fusion rev
JW7676	ACTTATCAGGATTGGCTTCAATTTTTCAAGCATCGAAGATGGGTAGACAGCTGCATGCAT	FRUIT: TU ΔtopAI/yjhQ(74)::thyA
JW7677	GTAAAGAGGCCACTAAATCGGCTTCTTTGCTGAAGCCAAATGCGGTGTAGGCTGGAGCTG	FRUIT: TD ΔtopAI/yjhQ(74)::thyA
JW7977b	TCGTCTTCACCTCGAGTAGACAGCTGCATGCATCTTTGTTATGGTGTGTTC	Cloning: pHigh fwd into pET-PesaRlux
JW7979b	ATTACCGTTATCATATGAACACACCATAAC	Cloning: pHigh-Rho term. rev
JW7994	TATGATAACGGTAATGCCAGTATCAGATGCAGTTCC	Cloning: pHigh-Rho term. fwd
JW7995	CGCAACTAGAGGATCCAAGCTTGCTTCTTTGCTGACG	Cloning: Rho term. into pET-PesaRlux rev
JW8044	TCGTCTTCACCTCGAGCGCCTGAATAAGTGATAATAAG	Cloning: rrf term.+ pHigh into pCS-PesaRlux fwd
JW8523	GAAGGAGATATACATATGGCGAATTCAAAAATTTCA	Cloning: introduce SD-EcoRI-luxC fwd
JW8522	CGCCATATGTATATCTCCTTCGGTACCGGTTCCTCAT	Cloning: introduce SD-EcoRI- luxC rev
JW8047	GCCTTCAAAATCTAGATTATCCGGCAATTCATTAAT	Cloning: mid luxC rev
JW9288	TGAGTAGGACGGATCCTTTTCAAGCATCGAAGATGGG	Cloning: topAI into pGB135 fwd
JW9289	TGAAATTTTTGAATTCATCATACTGAAGAACCTATTTAATCATC	Cloning: topAI (→-1) translational fusion to luxC rev
JW8809	TTCATGCATTGCTAGCACTGAAGAACCTATTTAATCATC	Cloning: topAI (→-1) transcriptional fusion to lacZ rev
JW9153	TTCATGCATTGCTAGCTTATAAATTCATACTGAAGAACC	Cloning: topAI (→+10)-lacZ transcriptional fusion rev
JW9154	TTCATGCATTGCTAGCTTAGAGAACGTGTAAGGTATGTTG	Cloning: topAI (→+42)-lacZ transcriptional fusion rev
JW9803	TGTTGATTTTAAATGTATTTACGGAGCGAATATTAACAC	Cloning: topAI rut*(4C→4A) rev
JW9804	CATTTAAAATCAACACGAGGCTTTGATGCTGGAG	Cloning: topAI rut*(4C→4A) fwd
JW9106	CTTTGGTACTGGAGAATGTAATCATCCGATAATCAG	Cloning: topAI (toiL ATG→gTa) fwd
JW9107	TCTCCAGTACCAAAGCCTCGGGTTGAG	Cloning: topAI (toiL ATG→gTa) rev
JW8741	GGCCAGTGCCAAGCTTGCTCGGATGATTACATTCTCCAG	Cloning: toiL translational fusion to lacZ rev
JW8998	GGCCAGTGCCAAGCTTGCTCGGATGATTACATTCTCTCACATCAAAGC	Cloning: toiL (CTG→tga) translational fusion to lacZ rev
JW8999	GGCCAGTGCCAAGCTTGCTCGGATGATTACTCACTCCAGCATC	Cloning: toiL (AAT→tga) translational fusion to lacZ rev
JW9013	GGCCAGTGCCAAGCTTGCTCGGATGATTACATTCTCCAGTCACAAAGC	Cloning: toiL (ATG→tga) translational fusion to lacZ rev
JW9014	GGCCAGTGCCAAGCTTGCTCGGATGATTACATTCTCCAGCATTCAAGCCTC	Cloning: toiL (TTG→tga) translational fusion to lacZ rev
JW10121	ATAATGAACTGTGCTCATCAAAGCCTCGGGTTG	Cloning: toiL (←M1)-ermCL(S10→) rev
JW10848	ATAATGAACTGTGCTCAGCATCAAAGCCTCGGG	Cloning: toiL (←E2) -ermCL(S10→) rev
JW10144	ATAATGAACTGTGCTCTCCAGCATCAAAGCCTC	Cloning: toiL (←L3)-ermCL(S10→) rev
JW10145	ATAATGAACTGTGCTATTCTCCAGCATCAAAGCCTC	Cloning: toiL (←N4)-ermCL(S10→) rev
JW10122	ATAATGAACTGTGCTTACATTCTCCAGCATCAAAGC	Cloning: toiL (←V5) -ermCL(S10→) rev
JW10146	ATAATGAACTGTGCTTAAATTCTCCAGCATCAAAGC	Cloning: toiL (←V5L)-ermCL(S10→) rev
JW10147	ATAATGAACTGTGCTGATTACATTCTCCAGCATCAAAG	Cloning: toiL (←I6)-ermCL(S10→) rev
JW10148	ATAATGAACTGTGCTGATGATTACATTCTCCAGCATC	Cloning: toiL (←I7)-ermCL(S10→) rev
JW9965	TGAAATTTTTGAATTCATGTTCATTATAACCCTCTTTAATTTGG	Cloning: toiL (←R8)-ermCL(S10→) rev
JW10849	ATAATGAACTGTGCTTTATCGGATGATTACATTCTCCAGC	Cloning: toiL (←TAA/stop) -ermCL(S10→) rev
JW10123	AGCACAGTTCATTATCAACC	Cloning: ermCL(S10→) fwd
JW9989	ACAAAAATACTAAAAATGCCCATCAAAGCCTCGGGTTG	Cloning: toiL 5' UTR-ermCL rev
JW9990	TTTTAGTATTTTTGTAATCAGCACAGTTCATTATCAACC	Cloning: ermCL fwd
JW10036	CAAGTTGATAACAAGCTAGCCCCGCGCCGCTGAGAAAAAGC	Cloning: rrsC (-175→) into pPro24 fwd
JW9737	ACCGTTTAGTTACGGCCGCCGTTTAC	Cloning: 23S RNA ΔT1917 (←+1923) rev
JW9740	GCCGTAACTAAACGGTCCTAAGGTAG	Cloning: 23S RNA ΔT1917 (+1908→) fwd
JW10104	TATAGTTACGGCCGCCGTTTACC	Cloning: wt 23S RNA (←+1917) rev
JW10105	GGCGGCCGTAACTATAACGGTC	Cloning: wt 23SRNA (+1925→) fwd
JW10037	AGGTCGACTCTAGAGGATCCTTCGGAGAGGGTTATTTCAG	Cloning: trpT (←+553) into pPro24 rev;
JW9200	ACGTGCGCAATACGTCTAC	SHAPE-Seq: RT topAI rev
JW9186	/5PHOS/AGATCGGAAGAGCACACGTCTGAACTCCAGTCAC/3SPC3/	SHAPE-Seq: A_adapter_b (A_b) (ssDNA adapter)
JW9178	CTTTCCCTACACGACGCTCTTCCGATCTRRRYCGTGTAAGGTATGTTGTTCCTG*A*C*G	SHAPE-Seq: topAI (+1M7) selection primer fwd
JW9179	CTTTCCCTACACGACGCTCTTCCGATCTYYYRCGTGTAAGGTATGTTGTTCCTG*A*C*G	SHAPE-Seq: topAI (DMSO) selection primer fwd
JW9175	AATGATACGGCGACCACCGAGATCTACACTCTTTCCCTACACGACGCTCTTCCGATCT	SHAPE-Seq: PE_forward=TruSeq Universal Adapter
JW9180	CAAGCAGAAGACGGCATACGAGATAGGAATGTGACTGGAGTTCAGACGTGTGCTC	SHAPE-Seq: Illumina index (#27) primer
JW9181	CAAGCAGAAGACGGCATACGAGATccggtgGTGACTGGAGTTCAGACGTGTGCTC	SHAPE-Seq: Illumina index (#30) primer
JW9182	CAAGCAGAAGACGGCATACGAGATGCGGACGTGACTGGAGTTCAGACGTGTGCTC	SHAPE-Seq: Illumina index (#18) primer
JW9183	CAAGCAGAAGACGGCATACGAGATcgcctgGTGACTGGAGTTCAGACGTGTGCTC	SHAPE-Seq: Illumina index (#33) primer
JW9184	CAAGCAGAAGACGGCATACGAGATgtcgtcGTGACTGGAGTTCAGACGTGTGCTC	SHAPE-Seq: Illumina index (#41) primer
JW9185	CAAGCAGAAGACGGCATACGAGATgctgtaGTGACTGGAGTTCAGACGTGTGCTC	SHAPE-Seq: Illumina index (#43) primer
JW9371	/5rApp/CTGTAGGCACCATCAAT/3ddC/	RiboSeq: 3' linker oligo
JW8875	/5Phos/AGATCGGAAGAGCGTCGTGTAGGGAAAGAGTGTAGATCTCGGTGGTCGC/iSp18/CACTCA/iSp18/TTCAGACGTGTGCTCTTCCGATCTATTGATGGTGCCTACAG	RiboSeq: RT primer
JW8835	AATGATACGGCGACCACCGAGATCTACAC	RiboSeq: PCR primer fwd
JW3249	CAAGCAGAAGACGGCATACGAGATcgtgatGTGACTGGAGTTCAGACGTGTGCTCTTCCG	RiboSeq: PCR primer rev barcode #1
JW10755	CAAGCAGAAGACGGCATACGAGATgtcgtcGTGACTGGAGTTCAGACGTGTGCTCTTCCG	RiboSeq: PCR primer rev barcode #41
JW160	CGGTTCTATGGTGGTTGA	qPCR: mreB fwd
JW161	GCGCACAGAAGAGGAGTA	qPCR: mreB rev
JW1518	CAACGCTTCCCGTTTTATCT	qPCR: rhoL fwd
JW1519	TTGTGAATGGTATGGCAGGA	qPCR: rhoL rev
JW2737	TGTGTGCTGATGGTTCTG	qPCR: rho intragenic fwd
JW2738	CTTCTCGATCACCATTTCC	qPCR: rho intragenic rev
JW11970	GCATTCGTCAGTGTCATCTGC	qPCR: topAI promoter (→ -290 nt) fwd
JW11972	CCTCGGGTTGAGTTGAAAGG	qPCR: topAI promoter (← -145 nt) rev
JW11968	ACCTTTCAACTCAACCCGAG	qPCR: topAI TSS (→ -165) fwd
JW11969	ATGTGCAAAACGTGCAAACAC	qPCR: topAI TSS (← -44 nt) rev
JW11975	CTGTTGCTGACCGACTGCAC	qPCR: topAI 3' end (→ +121 nt) fwd
JW11977	AGCGATTATCGAGCTGAGCG	qPCR: topAI 3' end (← +256 nt) rev
JW11990	AATACCAAGGGATGGGCGTG	qPCR: yjhQ 3' end (+269 nt →) fwd
JW11991	GGCCGAGAACAAAAACCGTC	qPCR: yjhQ 3' end (← +361 nt) rev
JW11988	GCTATCCGGCACCTTATCCC	qPCR: yjhQ 3' end (+413 nt →) fwd
JW11989	AGTGCTCCGGTTTCATCAGG	qPCR: yjhQ 3' end (← +520 nt) rev
GB007	GGACGGATCCTCGAGCATGCTTTCAAGCATCGAAGATGGGTGAGCATATTTATGTTCTGGATTTAACAAAAGGAGAATAATCTCCCGAAGGGAAAAGCCGATGAGGCCATTTCAGGCGTACTTCAACATGCATTCGTCAGTGTCATCTGCCTTTTCCAGTAAATGGGTTGGCATTCAATTTCCAAAGTACATCACACTTTTTCTACTGAAACATATCCCTCCTATAACTACGTGTTAATATTCGCTCCGTAAATACCTTTCAACTCAACCCGAGGCTTTGATGCTGGAGAATGTAATCATCCGAAGCACAGTTCATTATCAACCAAACAAAAAATAAGTGGTTATAATGAATCGTTAATAAGCAAAATTCATTATAACCAAATTAAAGAGGGTTATAAT…	geneBlock: toiL-ermCL(S10→) including toiL upstream and ermCL downstream sequences
